# Supplementary material for: The Identification and Verification of Key Long Noncoding RNAs in Ischemic Stroke
Source: Biomed Res Int. 2020 Dec 29;2020:2094320. doi: 10.1155/2020/2094320 (PMC7789472; doi:10.1155/2020/2094320)
Supplement: Supplementary 1 — Table S1: detailed information regarding qRT-PCR primer of 4 key lncRNAs. [file 2094320.f1.txt]

name	forward_primer	reverse_primer
GAPDH(Internal reference)	GGACCTGACCTGCCGTCTAG	GTAGCCCAGGATGCCCTTGA
LCMT1-AS2	GGCAGGTGACAAAGTGGC	CGTGGCAGGATGTTATGG
ERVH48-1	CCATTACGACTGCCACAT	GGAATATCCCTCACCACG
LINC01002	TAGGCACTGAGTCCAAAGAGGT	GGCTCATTCCTGACAACGG
LINC00638	TCACTCCACGCCCTTCAC	AGGTCGGTCCCAGGTTAG
