# Supplementary material for: The Identification and Verification of Key Long Noncoding RNAs in Ischemic Stroke
Source: Biomed Res Int. 2020 Dec 29;2020:2094320. doi: 10.1155/2020/2094320 (PMC7789472; doi:10.1155/2020/2094320)
Supplement: Supplementary 2 — Table S2: detailed information regarding the results of GO analysis. [file 2094320.f2.txt]

ONTOLOGY	ID	Description	GeneRatio	BgRatio	pvalue	p.adjust	qvalue	geneID	Count
BP	GO:0034198	cellular response to amino acid starvation	3/61	44/17653	0.000470044	0.392753065	0.370479431	154743/1026/143686	3
BP	GO:1904262	negative regulation of TORC1 signaling	2/61	15/17653	0.001198066	0.392753065	0.370479431	154743/143686	2
BP	GO:0099632	protein transport within plasma membrane	2/61	19/17653	0.001933862	0.392753065	0.370479431	3092/6809	2
BP	GO:0099637	neurotransmitter receptor transport	2/61	19/17653	0.001933862	0.392753065	0.370479431	3092/6809	2
BP	GO:0006622	protein targeting to lysosome	2/61	21/17653	0.00236439	0.392753065	0.370479431	64089/6653	2
BP	GO:2000050	regulation of non-canonical Wnt signaling pathway	2/61	22/17653	0.002595059	0.392753065	0.370479431	23500/85407	2
BP	GO:0070861	regulation of protein exit from endoplasmic reticulum	2/61	25/17653	0.003347839	0.392753065	0.370479431	6653/55432	2
BP	GO:0002675	positive regulation of acute inflammatory response	2/61	28/17653	0.004190301	0.392753065	0.370479431	1236/3572	2
BP	GO:0032594	protein transport within lipid bilayer	2/61	28/17653	0.004190301	0.392753065	0.370479431	3092/6809	2
BP	GO:1903432	regulation of TORC1 signaling	2/61	29/17653	0.004490727	0.392753065	0.370479431	154743/143686	2
BP	GO:0060070	canonical Wnt signaling pathway	5/61	317/17653	0.004733859	0.392753065	0.370479431	23500/8322/85407/83439/169200	5
BP	GO:0006623	protein targeting to vacuole	2/61	34/17653	0.006136812	0.392753065	0.370479431	64089/6653	2
BP	GO:0051056	regulation of small GTPase mediated signal transduction	5/61	339/17653	0.006263487	0.392753065	0.370479431	94134/23092/55789/23362/8036	5
BP	GO:0030111	regulation of Wnt signaling pathway	5/61	344/17653	0.00665457	0.392753065	0.370479431	23500/55789/85407/83439/169200	5
BP	GO:0031929	TOR signaling	3/61	111/17653	0.006682956	0.392753065	0.370479431	154743/55704/143686	3
BP	GO:0038202	TORC1 signaling	2/61	36/17653	0.006861165	0.392753065	0.370479431	154743/143686	2
BP	GO:0061462	protein localization to lysosome	2/61	37/17653	0.0072372	0.392753065	0.370479431	64089/6653	2
BP	GO:0046461	neutral lipid catabolic process	2/61	40/17653	0.00841995	0.392753065	0.370479431	11057/11343	2
BP	GO:0046464	acylglycerol catabolic process	2/61	40/17653	0.00841995	0.392753065	0.370479431	11057/11343	2
BP	GO:0098927	vesicle-mediated transport between endosomal compartments	2/61	41/17653	0.008832197	0.392753065	0.370479431	64089/6653	2
BP	GO:0032527	protein exit from endoplasmic reticulum	2/61	43/17653	0.009683299	0.392753065	0.370479431	6653/55432	2
BP	GO:0043280	positive regulation of cysteine-type endopeptidase activity involved in apoptotic process	3/61	129/17653	0.010079167	0.392753065	0.370479431	130399/112399/3092	3
BP	GO:1904837	beta-catenin-TCF complex assembly	2/61	44/17653	0.010122025	0.392753065	0.370479431	8085/83439	2
BP	GO:0072666	establishment of protein localization to vacuole	2/61	45/17653	0.01056945	0.392753065	0.370479431	64089/6653	2
BP	GO:0007015	actin filament organization	5/61	388/17653	0.010864904	0.392753065	0.370479431	94134/1236/1073/3092/4739	5
BP	GO:0032007	negative regulation of TOR signaling	2/61	46/17653	0.011025511	0.392753065	0.370479431	154743/143686	2
BP	GO:0043491	protein kinase B signaling	4/61	252/17653	0.011202881	0.392753065	0.370479431	1236/1026/3092/143686	4
BP	GO:0009267	cellular response to starvation	3/61	139/17653	0.012328137	0.392753065	0.370479431	154743/1026/143686	3
BP	GO:0006469	negative regulation of protein kinase activity	4/61	263/17653	0.012937548	0.392753065	0.370479431	1026/6653/161742/6895	4
BP	GO:0071901	negative regulation of protein serine/threonine kinase activity	3/61	142/17653	0.013054489	0.392753065	0.370479431	1026/6653/161742	3
BP	GO:2001056	positive regulation of cysteine-type endopeptidase activity	3/61	144/17653	0.01355209	0.392753065	0.370479431	130399/112399/3092	3
BP	GO:0016482	cytosolic transport	3/61	146/17653	0.014060421	0.392753065	0.370479431	64089/6653/9559	3
BP	GO:0000082	G1/S transition of mitotic cell cycle	4/61	276/17653	0.015198801	0.392753065	0.370479431	586/993/1026/4863	4
BP	GO:2000242	negative regulation of reproductive process	2/61	55/17653	0.015508366	0.392753065	0.370479431	130399/5567	2
BP	GO:0035567	non-canonical Wnt signaling pathway	3/61	154/17653	0.016201638	0.392753065	0.370479431	23500/8322/85407	3
BP	GO:0033673	negative regulation of kinase activity	4/61	283/17653	0.01651378	0.392753065	0.370479431	1026/6653/161742/6895	4
BP	GO:0046503	glycerolipid catabolic process	2/61	57/17653	0.016594333	0.392753065	0.370479431	11057/11343	2
BP	GO:0072665	protein localization to vacuole	2/61	58/17653	0.017149197	0.392753065	0.370479431	64089/6653	2
BP	GO:0050821	protein stabilization	3/61	159/17653	0.01762806	0.392753065	0.370479431	1026/1389/3092	3
BP	GO:0045600	positive regulation of fat cell differentiation	2/61	60/17653	0.01828239	0.392753065	0.370479431	1389/169200	2
BP	GO:0044843	cell cycle G1/S phase transition	4/61	295/17653	0.018930588	0.392753065	0.370479431	586/993/1026/4863	4
BP	GO:0045685	regulation of glial cell differentiation	2/61	65/17653	0.021249521	0.392753065	0.370479431	23500/3572	2
BP	GO:0010950	positive regulation of endopeptidase activity	3/61	171/17653	0.021330033	0.392753065	0.370479431	130399/112399/3092	3
BP	GO:0030177	positive regulation of Wnt signaling pathway	3/61	171/17653	0.021330033	0.392753065	0.370479431	23500/55789/85407	3
BP	GO:0051348	negative regulation of transferase activity	4/61	309/17653	0.022015486	0.392753065	0.370479431	1026/6653/161742/6895	4
BP	GO:0051235	maintenance of location	4/61	314/17653	0.023187733	0.392753065	0.370479431	130399/1236/6653/23345	4
BP	GO:0042594	response to starvation	3/61	177/17653	0.02332902	0.392753065	0.370479431	154743/1026/143686	3
BP	GO:1901654	response to ketone	3/61	183/17653	0.025426801	0.392753065	0.370479431	11057/1236/1026	3
BP	GO:0010952	positive regulation of peptidase activity	3/61	188/17653	0.02725037	0.392753065	0.370479431	130399/112399/3092	3
BP	GO:0032507	maintenance of protein location in cell	2/61	75/17653	0.027734417	0.392753065	0.370479431	6653/23345	2
BP	GO:0098876	vesicle-mediated transport to the plasma membrane	2/61	75/17653	0.027734417	0.392753065	0.370479431	6809/9559	2
BP	GO:0002573	myeloid leukocyte differentiation	3/61	191/17653	0.028377374	0.392753065	0.370479431	1236/28962/169200	3
BP	GO:0034644	cellular response to UV	2/61	76/17653	0.028421649	0.392753065	0.370479431	993/1026	2
BP	GO:0001570	vasculogenesis	2/61	78/17653	0.029816535	0.392753065	0.370479431	8322/161742	2
BP	GO:0043407	negative regulation of MAP kinase activity	2/61	78/17653	0.029816535	0.392753065	0.370479431	6653/161742	2
BP	GO:0022412	cellular process involved in reproduction in multicellular organism	4/61	340/17653	0.029894206	0.392753065	0.370479431	11057/8322/8085/6895	4
BP	GO:0045862	positive regulation of proteolysis	4/61	350/17653	0.032750493	0.392753065	0.370479431	130399/112399/3092/160418	4
BP	GO:0001553	luteinization	1/61	10/17653	0.034031173	0.392753065	0.370479431	8322	1
BP	GO:0001768	establishment of T cell polarity	1/61	10/17653	0.034031173	0.392753065	0.370479431	1236	1
BP	GO:0002863	positive regulation of inflammatory response to antigenic stimulus	1/61	10/17653	0.034031173	0.392753065	0.370479431	1236	1
BP	GO:0006222	UMP biosynthetic process	1/61	10/17653	0.034031173	0.392753065	0.370479431	51727	1
BP	GO:0009173	pyrimidine ribonucleoside monophosphate metabolic process	1/61	10/17653	0.034031173	0.392753065	0.370479431	51727	1
BP	GO:0009174	pyrimidine ribonucleoside monophosphate biosynthetic process	1/61	10/17653	0.034031173	0.392753065	0.370479431	51727	1
BP	GO:0030422	production of siRNA involved in RNA interference	1/61	10/17653	0.034031173	0.392753065	0.370479431	6895	1
BP	GO:0033148	positive regulation of intracellular estrogen receptor signaling pathway	1/61	10/17653	0.034031173	0.392753065	0.370479431	8085	1
BP	GO:0035871	protein K11-linked deubiquitination	1/61	10/17653	0.034031173	0.392753065	0.370479431	55432	1
BP	GO:0045060	negative thymic T cell selection	1/61	10/17653	0.034031173	0.392753065	0.370479431	1236	1
BP	GO:0046049	UMP metabolic process	1/61	10/17653	0.034031173	0.392753065	0.370479431	51727	1
BP	GO:0051791	medium-chain fatty acid metabolic process	1/61	10/17653	0.034031173	0.392753065	0.370479431	11057	1
BP	GO:0070862	negative regulation of protein exit from endoplasmic reticulum	1/61	10/17653	0.034031173	0.392753065	0.370479431	55432	1
BP	GO:0097048	dendritic cell apoptotic process	1/61	10/17653	0.034031173	0.392753065	0.370479431	1236	1
BP	GO:0098969	neurotransmitter receptor transport to postsynaptic membrane	1/61	10/17653	0.034031173	0.392753065	0.370479431	6809	1
BP	GO:1903540	establishment of protein localization to postsynaptic membrane	1/61	10/17653	0.034031173	0.392753065	0.370479431	6809	1
BP	GO:1903651	positive regulation of cytoplasmic transport	1/61	10/17653	0.034031173	0.392753065	0.370479431	6653	1
BP	GO:1990253	cellular response to leucine starvation	1/61	10/17653	0.034031173	0.392753065	0.370479431	143686	1
BP	GO:2000042	negative regulation of double-strand break repair via homologous recombination	1/61	10/17653	0.034031173	0.392753065	0.370479431	10721	1
BP	GO:2000586	regulation of platelet-derived growth factor receptor-beta signaling pathway	1/61	10/17653	0.034031173	0.392753065	0.370479431	3092	1
BP	GO:2000668	regulation of dendritic cell apoptotic process	1/61	10/17653	0.034031173	0.392753065	0.370479431	1236	1
BP	GO:0042176	regulation of protein catabolic process	4/61	355/17653	0.034236978	0.392753065	0.370479431	85407/6653/160418/55432	4
BP	GO:0031669	cellular response to nutrient levels	3/61	208/17653	0.035227084	0.392753065	0.370479431	154743/1026/143686	3
BP	GO:0045732	positive regulation of protein catabolic process	3/61	212/17653	0.036952516	0.392753065	0.370479431	85407/6653/160418	3
BP	GO:0000079	regulation of cyclin-dependent protein serine/threonine kinase activity	2/61	88/17653	0.037185659	0.392753065	0.370479431	993/1026	2
BP	GO:0001767	establishment of lymphocyte polarity	1/61	11/17653	0.037370974	0.392753065	0.370479431	1236	1
BP	GO:0031987	locomotion involved in locomotory behavior	1/61	11/17653	0.037370974	0.392753065	0.370479431	8322	1
BP	GO:0043383	negative T cell selection	1/61	11/17653	0.037370974	0.392753065	0.370479431	1236	1
BP	GO:0070106	interleukin-27-mediated signaling pathway	1/61	11/17653	0.037370974	0.392753065	0.370479431	3572	1
BP	GO:0070757	interleukin-35-mediated signaling pathway	1/61	11/17653	0.037370974	0.392753065	0.370479431	3572	1
BP	GO:0090084	negative regulation of inclusion body assembly	1/61	11/17653	0.037370974	0.392753065	0.370479431	6653	1
BP	GO:0090527	actin filament reorganization	1/61	11/17653	0.037370974	0.392753065	0.370479431	4739	1
BP	GO:0098877	neurotransmitter receptor transport to plasma membrane	1/61	11/17653	0.037370974	0.392753065	0.370479431	6809	1
BP	GO:1902992	negative regulation of amyloid precursor protein catabolic process	1/61	11/17653	0.037370974	0.392753065	0.370479431	6653	1
BP	GO:0043281	regulation of cysteine-type endopeptidase activity involved in apoptotic process	3/61	216/17653	0.038720905	0.392753065	0.370479431	130399/112399/3092	3
BP	GO:0006919	activation of cysteine-type endopeptidase activity involved in apoptotic process	2/61	91/17653	0.039519617	0.392753065	0.370479431	112399/3092	2
BP	GO:0030316	osteoclast differentiation	2/61	91/17653	0.039519617	0.392753065	0.370479431	28962/169200	2
BP	GO:0120034	positive regulation of plasma membrane bounded cell projection assembly	2/61	91/17653	0.039519617	0.392753065	0.370479431	55704/1236	2
BP	GO:0051896	regulation of protein kinase B signaling	3/61	218/17653	0.039621142	0.392753065	0.370479431	1236/3092/143686	3
BP	GO:0002864	regulation of acute inflammatory response to antigenic stimulus	1/61	12/17653	0.040699416	0.392753065	0.370479431	1236	1
BP	GO:0019471	4-hydroxyproline metabolic process	1/61	12/17653	0.040699416	0.392753065	0.370479431	112399	1
BP	GO:0043201	response to leucine	1/61	12/17653	0.040699416	0.392753065	0.370479431	143686	1
BP	GO:0048715	negative regulation of oligodendrocyte differentiation	1/61	12/17653	0.040699416	0.392753065	0.370479431	23500	1
BP	GO:0060628	regulation of ER to Golgi vesicle-mediated transport	1/61	12/17653	0.040699416	0.392753065	0.370479431	6653	1
BP	GO:0061450	trophoblast cell migration	1/61	12/17653	0.040699416	0.392753065	0.370479431	130399	1
BP	GO:1901163	regulation of trophoblast cell migration	1/61	12/17653	0.040699416	0.392753065	0.370479431	130399	1
BP	GO:2000052	positive regulation of non-canonical Wnt signaling pathway	1/61	12/17653	0.040699416	0.392753065	0.370479431	85407	1
BP	GO:1904029	regulation of cyclin-dependent protein kinase activity	2/61	93/17653	0.041105916	0.392753065	0.370479431	993/1026	2
BP	GO:0032006	regulation of TOR signaling	2/61	94/17653	0.041908015	0.392753065	0.370479431	154743/143686	2
BP	GO:1990823	response to leukemia inhibitory factor	2/61	95/17653	0.042716014	0.392753065	0.370479431	8322/55892	2
BP	GO:1990830	cellular response to leukemia inhibitory factor	2/61	95/17653	0.042716014	0.392753065	0.370479431	8322/55892	2
BP	GO:0051651	maintenance of location in cell	2/61	96/17653	0.043529865	0.392753065	0.370479431	6653/23345	2
BP	GO:0001771	immunological synapse formation	1/61	13/17653	0.044016537	0.392753065	0.370479431	1236	1
BP	GO:0030836	positive regulation of actin filament depolymerization	1/61	13/17653	0.044016537	0.392753065	0.370479431	1073	1
BP	GO:0031274	positive regulation of pseudopodium assembly	1/61	13/17653	0.044016537	0.392753065	0.370479431	1236	1
BP	GO:0035791	platelet-derived growth factor receptor-beta signaling pathway	1/61	13/17653	0.044016537	0.392753065	0.370479431	3092	1
BP	GO:0043568	positive regulation of insulin-like growth factor receptor signaling pathway	1/61	13/17653	0.044016537	0.392753065	0.370479431	55023	1
BP	GO:0050862	positive regulation of T cell receptor signaling pathway	1/61	13/17653	0.044016537	0.392753065	0.370479431	1236	1
BP	GO:0060576	intestinal epithelial cell development	1/61	13/17653	0.044016537	0.392753065	0.370479431	1026	1
BP	GO:0060831	smoothened signaling pathway involved in dorsal/ventral neural tube patterning	1/61	13/17653	0.044016537	0.392753065	0.370479431	5567	1
BP	GO:0070863	positive regulation of protein exit from endoplasmic reticulum	1/61	13/17653	0.044016537	0.392753065	0.370479431	6653	1
BP	GO:1903539	protein localization to postsynaptic membrane	1/61	13/17653	0.044016537	0.392753065	0.370479431	6809	1
BP	GO:1904293	negative regulation of ERAD pathway	1/61	13/17653	0.044016537	0.392753065	0.370479431	55432	1
BP	GO:1905049	negative regulation of metallopeptidase activity	1/61	13/17653	0.044016537	0.392753065	0.370479431	6653	1
BP	GO:2000010	positive regulation of protein localization to cell surface	1/61	13/17653	0.044016537	0.392753065	0.370479431	6809	1
BP	GO:2000095	regulation of Wnt signaling pathway, planar cell polarity pathway	1/61	13/17653	0.044016537	0.392753065	0.370479431	85407	1
BP	GO:0009896	positive regulation of catabolic process	4/61	393/17653	0.046815122	0.392753065	0.370479431	85407/143686/6653/160418	4
BP	GO:0007041	lysosomal transport	2/61	100/17653	0.046842819	0.392753065	0.370479431	64089/6653	2
BP	GO:0030099	myeloid cell differentiation	4/61	394/17653	0.047176777	0.392753065	0.370479431	1236/8085/28962/169200	4
BP	GO:0019511	peptidyl-proline hydroxylation	1/61	14/17653	0.047322375	0.392753065	0.370479431	112399	1
BP	GO:0031054	pre-miRNA processing	1/61	14/17653	0.047322375	0.392753065	0.370479431	6895	1
BP	GO:0031272	regulation of pseudopodium assembly	1/61	14/17653	0.047322375	0.392753065	0.370479431	1236	1
BP	GO:0043517	positive regulation of DNA damage response, signal transduction by p53 class mediator	1/61	14/17653	0.047322375	0.392753065	0.370479431	161742	1
BP	GO:0048711	positive regulation of astrocyte differentiation	1/61	14/17653	0.047322375	0.392753065	0.370479431	3572	1
BP	GO:0090399	replicative senescence	1/61	14/17653	0.047322375	0.392753065	0.370479431	1026	1
BP	GO:1904152	regulation of retrograde protein transport, ER to cytosol	1/61	14/17653	0.047322375	0.392753065	0.370479431	55432	1
BP	GO:0031668	cellular response to extracellular stimulus	3/61	237/17653	0.048700455	0.392753065	0.370479431	154743/1026/143686	3
BP	GO:0002922	positive regulation of humoral immune response	1/61	15/17653	0.050616969	0.392753065	0.370479431	1236	1
BP	GO:0006646	phosphatidylethanolamine biosynthetic process	1/61	15/17653	0.050616969	0.392753065	0.370479431	55500	1
BP	GO:0010801	negative regulation of peptidyl-threonine phosphorylation	1/61	15/17653	0.050616969	0.392753065	0.370479431	161742	1
BP	GO:0034380	high-density lipoprotein particle assembly	1/61	15/17653	0.050616969	0.392753065	0.370479431	5567	1
BP	GO:0060026	convergent extension	1/61	15/17653	0.050616969	0.392753065	0.370479431	85407	1
BP	GO:0071850	mitotic cell cycle arrest	1/61	15/17653	0.050616969	0.392753065	0.370479431	1026	1
BP	GO:0014013	regulation of gliogenesis	2/61	105/17653	0.051109918	0.392753065	0.370479431	23500/3572	2
BP	GO:0045185	maintenance of protein location	2/61	105/17653	0.051109918	0.392753065	0.370479431	6653/23345	2
BP	GO:0043547	positive regulation of GTPase activity	4/61	407/17653	0.052021129	0.392753065	0.370479431	94134/23092/1236/55789	4
BP	GO:0045926	negative regulation of growth	3/61	244/17653	0.052282176	0.392753065	0.370479431	1026/85407/29946	3
BP	GO:0002070	epithelial cell maturation	1/61	16/17653	0.053900355	0.392753065	0.370479431	1026	1
BP	GO:0009130	pyrimidine nucleoside monophosphate biosynthetic process	1/61	16/17653	0.053900355	0.392753065	0.370479431	51727	1
BP	GO:0016246	RNA interference	1/61	16/17653	0.053900355	0.392753065	0.370479431	6895	1
BP	GO:0016446	somatic hypermutation of immunoglobulin genes	1/61	16/17653	0.053900355	0.392753065	0.370479431	10721	1
BP	GO:0031269	pseudopodium assembly	1/61	16/17653	0.053900355	0.392753065	0.370479431	1236	1
BP	GO:0031629	synaptic vesicle fusion to presynaptic active zone membrane	1/61	16/17653	0.053900355	0.392753065	0.370479431	6809	1
BP	GO:0033145	positive regulation of intracellular steroid hormone receptor signaling pathway	1/61	16/17653	0.053900355	0.392753065	0.370479431	8085	1
BP	GO:0045780	positive regulation of bone resorption	1/61	16/17653	0.053900355	0.392753065	0.370479431	169200	1
BP	GO:0046852	positive regulation of bone remodeling	1/61	16/17653	0.053900355	0.392753065	0.370479431	169200	1
BP	GO:0051447	negative regulation of meiotic cell cycle	1/61	16/17653	0.053900355	0.392753065	0.370479431	5567	1
BP	GO:0061298	retina vasculature development in camera-type eye	1/61	16/17653	0.053900355	0.392753065	0.370479431	8322	1
BP	GO:0090083	regulation of inclusion body assembly	1/61	16/17653	0.053900355	0.392753065	0.370479431	6653	1
BP	GO:0099500	vesicle fusion to plasma membrane	1/61	16/17653	0.053900355	0.392753065	0.370479431	6809	1
BP	GO:0140058	neuron projection arborization	1/61	16/17653	0.053900355	0.392753065	0.370479431	8322	1
BP	GO:0007281	germ cell development	3/61	248/17653	0.054385034	0.392753065	0.370479431	11057/8085/6895	3
BP	GO:0052548	regulation of endopeptidase activity	4/61	414/17653	0.054739243	0.392753065	0.370479431	130399/112399/3092/6653	4
BP	GO:2000116	regulation of cysteine-type endopeptidase activity	3/61	249/17653	0.054917077	0.392753065	0.370479431	130399/112399/3092	3
BP	GO:0034504	protein localization to nucleus	3/61	250/17653	0.055451641	0.392753065	0.370479431	1026/55916/23345	3
BP	GO:0030330	DNA damage response, signal transduction by p53 class mediator	2/61	110/17653	0.055511456	0.392753065	0.370479431	1026/161742	2
BP	GO:0060071	Wnt signaling pathway, planar cell polarity pathway	2/61	110/17653	0.055511456	0.392753065	0.370479431	8322/85407	2
BP	GO:0031647	regulation of protein stability	3/61	253/17653	0.0570704	0.392753065	0.370479431	1026/1389/3092	3
BP	GO:0002566	somatic diversification of immune receptors via somatic mutation	1/61	17/17653	0.057172571	0.392753065	0.370479431	10721	1
BP	GO:0002577	regulation of antigen processing and presentation	1/61	17/17653	0.057172571	0.392753065	0.370479431	1236	1
BP	GO:0009129	pyrimidine nucleoside monophosphate metabolic process	1/61	17/17653	0.057172571	0.392753065	0.370479431	51727	1
BP	GO:0031268	pseudopodium organization	1/61	17/17653	0.057172571	0.392753065	0.370479431	1236	1
BP	GO:0032460	negative regulation of protein oligomerization	1/61	17/17653	0.057172571	0.392753065	0.370479431	6653	1
BP	GO:0034199	activation of protein kinase A activity	1/61	17/17653	0.057172571	0.392753065	0.370479431	5567	1
BP	GO:0038092	nodal signaling pathway	1/61	17/17653	0.057172571	0.392753065	0.370479431	130399	1
BP	GO:0060977	coronary vasculature morphogenesis	1/61	17/17653	0.057172571	0.392753065	0.370479431	161742	1
BP	GO:0070102	interleukin-6-mediated signaling pathway	1/61	17/17653	0.057172571	0.392753065	0.370479431	3572	1
BP	GO:0090175	regulation of establishment of planar polarity	2/61	112/17653	0.057308431	0.392753065	0.370479431	8322/85407	2
BP	GO:0032868	response to insulin	3/61	254/17653	0.057614991	0.392753065	0.370479431	130399/55023/143686	3
BP	GO:0045667	regulation of osteoblast differentiation	2/61	114/17653	0.059125645	0.392753065	0.370479431	3572/169200	2
BP	GO:0043434	response to peptide hormone	4/61	427/17653	0.059989669	0.392753065	0.370479431	130399/55023/5567/143686	4
BP	GO:0006206	pyrimidine nucleobase metabolic process	1/61	18/17653	0.060433655	0.392753065	0.370479431	51727	1
BP	GO:0010224	response to UV-B	1/61	18/17653	0.060433655	0.392753065	0.370479431	1026	1
BP	GO:0036010	protein localization to endosome	1/61	18/17653	0.060433655	0.392753065	0.370479431	6653	1
BP	GO:0046716	muscle cell cellular homeostasis	1/61	18/17653	0.060433655	0.392753065	0.370479431	1073	1
BP	GO:0048268	clathrin coat assembly	1/61	18/17653	0.060433655	0.392753065	0.370479431	3092	1
BP	GO:0051412	response to corticosterone	1/61	18/17653	0.060433655	0.392753065	0.370479431	1026	1
BP	GO:1901881	positive regulation of protein depolymerization	1/61	18/17653	0.060433655	0.392753065	0.370479431	1073	1
BP	GO:1902003	regulation of amyloid-beta formation	1/61	18/17653	0.060433655	0.392753065	0.370479431	6653	1
BP	GO:1904683	regulation of metalloendopeptidase activity	1/61	18/17653	0.060433655	0.392753065	0.370479431	6653	1
BP	GO:0006639	acylglycerol metabolic process	2/61	116/17653	0.060962743	0.392753065	0.370479431	11057/11343	2
BP	GO:0008543	fibroblast growth factor receptor signaling pathway	2/61	116/17653	0.060962743	0.392753065	0.370479431	8036/161742	2
BP	GO:0017156	calcium ion regulated exocytosis	2/61	116/17653	0.060962743	0.392753065	0.370479431	192683/6809	2
BP	GO:0033157	regulation of intracellular protein transport	3/61	261/17653	0.06149658	0.392753065	0.370479431	1026/6653/55432	3
BP	GO:0006638	neutral lipid metabolic process	2/61	117/17653	0.061888639	0.392753065	0.370479431	11057/11343	2
BP	GO:0060828	regulation of canonical Wnt signaling pathway	3/61	263/17653	0.062627752	0.392753065	0.370479431	23500/85407/169200	3
BP	GO:0051668	localization within membrane	2/61	118/17653	0.062819374	0.392753065	0.370479431	3092/6809	2
BP	GO:0001933	negative regulation of protein phosphorylation	4/61	435/17653	0.063350757	0.392753065	0.370479431	1026/6653/161742/6895	4
BP	GO:0006978	DNA damage response, signal transduction by p53 class mediator resulting in transcription of p21 class mediator	1/61	19/17653	0.063683643	0.392753065	0.370479431	1026	1
BP	GO:0010560	positive regulation of glycoprotein biosynthetic process	1/61	19/17653	0.063683643	0.392753065	0.370479431	1236	1
BP	GO:0033158	regulation of protein import into nucleus, translocation	1/61	19/17653	0.063683643	0.392753065	0.370479431	1026	1
BP	GO:0045061	thymic T cell selection	1/61	19/17653	0.063683643	0.392753065	0.370479431	1236	1
BP	GO:0071731	response to nitric oxide	1/61	19/17653	0.063683643	0.392753065	0.370479431	1236	1
BP	GO:1905331	negative regulation of morphogenesis of an epithelium	1/61	19/17653	0.063683643	0.392753065	0.370479431	85407	1
BP	GO:0045598	regulation of fat cell differentiation	2/61	121/17653	0.065640188	0.392753065	0.370479431	1389/169200	2
BP	GO:0071482	cellular response to light stimulus	2/61	121/17653	0.065640188	0.392753065	0.370479431	993/1026	2
BP	GO:0052547	regulation of peptidase activity	4/61	441/17653	0.065936142	0.392753065	0.370479431	130399/112399/3092/6653	4
BP	GO:0001736	establishment of planar polarity	2/61	122/17653	0.066589853	0.392753065	0.370479431	8322/85407	2
BP	GO:0007164	establishment of tissue polarity	2/61	122/17653	0.066589853	0.392753065	0.370479431	8322/85407	2
BP	GO:0042772	DNA damage response, signal transduction resulting in transcription	1/61	20/17653	0.066922574	0.392753065	0.370479431	1026	1
BP	GO:0045724	positive regulation of cilium assembly	1/61	20/17653	0.066922574	0.392753065	0.370479431	55704	1
BP	GO:0046112	nucleobase biosynthetic process	1/61	20/17653	0.066922574	0.392753065	0.370479431	51727	1
BP	GO:0046337	phosphatidylethanolamine metabolic process	1/61	20/17653	0.066922574	0.392753065	0.370479431	55500	1
BP	GO:0060575	intestinal epithelial cell differentiation	1/61	20/17653	0.066922574	0.392753065	0.370479431	1026	1
BP	GO:1901798	positive regulation of signal transduction by p53 class mediator	1/61	20/17653	0.066922574	0.392753065	0.370479431	161742	1
BP	GO:1990126	retrograde transport, endosome to plasma membrane	1/61	20/17653	0.066922574	0.392753065	0.370479431	9559	1
BP	GO:0008286	insulin receptor signaling pathway	2/61	124/17653	0.068503018	0.392753065	0.370479431	55023/143686	2
BP	GO:0045834	positive regulation of lipid metabolic process	2/61	124/17653	0.068503018	0.392753065	0.370479431	1236/1389	2
BP	GO:0045995	regulation of embryonic development	2/61	124/17653	0.068503018	0.392753065	0.370479431	85407/5567	2
BP	GO:0046330	positive regulation of JNK cascade	2/61	124/17653	0.068503018	0.392753065	0.370479431	1236/8322	2
BP	GO:0050729	positive regulation of inflammatory response	2/61	124/17653	0.068503018	0.392753065	0.370479431	1236/3572	2
BP	GO:0034976	response to endoplasmic reticulum stress	3/61	274/17653	0.069022193	0.392753065	0.370479431	192683/160418/55432	3
BP	GO:0002021	response to dietary excess	1/61	21/17653	0.070150483	0.392753065	0.370479431	130399	1
BP	GO:0002438	acute inflammatory response to antigenic stimulus	1/61	21/17653	0.070150483	0.392753065	0.370479431	1236	1
BP	GO:0002861	regulation of inflammatory response to antigenic stimulus	1/61	21/17653	0.070150483	0.392753065	0.370479431	1236	1
BP	GO:0009083	branched-chain amino acid catabolic process	1/61	21/17653	0.070150483	0.392753065	0.370479431	586	1
BP	GO:0035929	steroid hormone secretion	1/61	21/17653	0.070150483	0.392753065	0.370479431	8322	1
BP	GO:0046132	pyrimidine ribonucleoside biosynthetic process	1/61	21/17653	0.070150483	0.392753065	0.370479431	51727	1
BP	GO:0050857	positive regulation of antigen receptor-mediated signaling pathway	1/61	21/17653	0.070150483	0.392753065	0.370479431	1236	1
BP	GO:1903649	regulation of cytoplasmic transport	1/61	21/17653	0.070150483	0.392753065	0.370479431	6653	1
BP	GO:0090068	positive regulation of cell cycle process	3/61	277/17653	0.070816221	0.392753065	0.370479431	993/1026/55023	3
BP	GO:0051961	negative regulation of nervous system development	3/61	278/17653	0.071418934	0.392753065	0.370479431	23500/5567/6653	3
BP	GO:0009220	pyrimidine ribonucleotide biosynthetic process	1/61	22/17653	0.073367408	0.392753065	0.370479431	51727	1
BP	GO:0021516	dorsal spinal cord development	1/61	22/17653	0.073367408	0.392753065	0.370479431	23500	1
BP	GO:0070841	inclusion body assembly	1/61	22/17653	0.073367408	0.392753065	0.370479431	6653	1
BP	GO:0099072	regulation of postsynaptic membrane neurotransmitter receptor levels	1/61	22/17653	0.073367408	0.392753065	0.370479431	6809	1
BP	GO:0050921	positive regulation of chemotaxis	2/61	130/17653	0.074350201	0.392753065	0.370479431	1236/6809	2
BP	GO:0007034	vacuolar transport	2/61	131/17653	0.075340003	0.392753065	0.370479431	64089/6653	2
BP	GO:0007265	Ras protein signal transduction	4/61	463/17653	0.075883869	0.392753065	0.370479431	1026/23362/8625/8036	4
BP	GO:0050671	positive regulation of lymphocyte proliferation	2/61	132/17653	0.076334062	0.392753065	0.370479431	1026/3572	2
BP	GO:0002407	dendritic cell chemotaxis	1/61	23/17653	0.076573385	0.392753065	0.370479431	1236	1
BP	GO:0010586	miRNA metabolic process	1/61	23/17653	0.076573385	0.392753065	0.370479431	6895	1
BP	GO:0018126	protein hydroxylation	1/61	23/17653	0.076573385	0.392753065	0.370479431	112399	1
BP	GO:0021904	dorsal/ventral neural tube patterning	1/61	23/17653	0.076573385	0.392753065	0.370479431	5567	1
BP	GO:0034067	protein localization to Golgi apparatus	1/61	23/17653	0.076573385	0.392753065	0.370479431	6653	1
BP	GO:0034205	amyloid-beta formation	1/61	23/17653	0.076573385	0.392753065	0.370479431	6653	1
BP	GO:0045956	positive regulation of calcium ion-dependent exocytosis	1/61	23/17653	0.076573385	0.392753065	0.370479431	192683	1
BP	GO:0050687	negative regulation of defense response to virus	1/61	23/17653	0.076573385	0.392753065	0.370479431	6895	1
BP	GO:0051457	maintenance of protein location in nucleus	1/61	23/17653	0.076573385	0.392753065	0.370479431	23345	1
BP	GO:0055093	response to hyperoxia	1/61	23/17653	0.076573385	0.392753065	0.370479431	1026	1
BP	GO:1902991	regulation of amyloid precursor protein catabolic process	1/61	23/17653	0.076573385	0.392753065	0.370479431	6653	1
BP	GO:1903020	positive regulation of glycoprotein metabolic process	1/61	23/17653	0.076573385	0.392753065	0.370479431	1236	1
BP	GO:2000780	negative regulation of double-strand break repair	1/61	23/17653	0.076573385	0.392753065	0.370479431	10721	1
BP	GO:0031667	response to nutrient levels	4/61	465/17653	0.076824265	0.392753065	0.370479431	130399/154743/1026/143686	4
BP	GO:0032946	positive regulation of mononuclear cell proliferation	2/61	133/17653	0.077332335	0.392753065	0.370479431	1026/3572	2
BP	GO:0032103	positive regulation of response to external stimulus	3/61	289/17653	0.078201776	0.392753065	0.370479431	1236/3572/6809	3
BP	GO:0042770	signal transduction in response to DNA damage	2/61	134/17653	0.078334784	0.392753065	0.370479431	1026/161742	2
BP	GO:0009411	response to UV	2/61	135/17653	0.079341369	0.392753065	0.370479431	993/1026	2
BP	GO:0009081	branched-chain amino acid metabolic process	1/61	24/17653	0.079768452	0.392753065	0.370479431	586	1
BP	GO:0009218	pyrimidine ribonucleotide metabolic process	1/61	24/17653	0.079768452	0.392753065	0.370479431	51727	1
BP	GO:0010640	regulation of platelet-derived growth factor receptor signaling pathway	1/61	24/17653	0.079768452	0.392753065	0.370479431	3092	1
BP	GO:0034695	response to prostaglandin E	1/61	24/17653	0.079768452	0.392753065	0.370479431	1236	1
BP	GO:0045672	positive regulation of osteoclast differentiation	1/61	24/17653	0.079768452	0.392753065	0.370479431	169200	1
BP	GO:0045686	negative regulation of glial cell differentiation	1/61	24/17653	0.079768452	0.392753065	0.370479431	23500	1
BP	GO:0045910	negative regulation of DNA recombination	1/61	24/17653	0.079768452	0.392753065	0.370479431	10721	1
BP	GO:0006633	fatty acid biosynthetic process	2/61	136/17653	0.08035205	0.393020096	0.370731318	11057/11343	2
BP	GO:0042326	negative regulation of phosphorylation	4/61	473/17653	0.080645132	0.393020096	0.370731318	1026/6653/161742/6895	4
BP	GO:0016236	macroautophagy	3/61	293/17653	0.080736686	0.393020096	0.370731318	143686/9559/55432	3
BP	GO:0001738	morphogenesis of a polarized epithelium	2/61	137/17653	0.081366788	0.394598333	0.372220051	8322/85407	2
BP	GO:0006260	DNA replication	3/61	296/17653	0.082661367	0.39486683	0.372473322	55704/993/10721	3
BP	GO:0030336	negative regulation of cell migration	3/61	296/17653	0.082661367	0.39486683	0.372473322	11057/130399/161742	3
BP	GO:0045738	negative regulation of DNA repair	1/61	25/17653	0.082952644	0.39486683	0.372473322	10721	1
BP	GO:0045992	negative regulation of embryonic development	1/61	25/17653	0.082952644	0.39486683	0.372473322	5567	1
BP	GO:1905048	regulation of metallopeptidase activity	1/61	25/17653	0.082952644	0.39486683	0.372473322	6653	1
BP	GO:0070665	positive regulation of leukocyte proliferation	2/61	140/17653	0.084434957	0.398978369	0.376351688	1026/3572	2
BP	GO:2000241	regulation of reproductive process	2/61	140/17653	0.084434957	0.398978369	0.376351688	130399/5567	2
BP	GO:0043087	regulation of GTPase activity	4/61	482/17653	0.085055966	0.399649417	0.376984681	94134/23092/1236/55789	4
BP	GO:0007286	spermatid development	2/61	141/17653	0.085465536	0.399649417	0.376984681	11057/6895	2
BP	GO:0000188	inactivation of MAPK activity	1/61	26/17653	0.086125998	0.399649417	0.376984681	161742	1
BP	GO:0043567	regulation of insulin-like growth factor receptor signaling pathway	1/61	26/17653	0.086125998	0.399649417	0.376984681	55023	1
BP	GO:1902751	positive regulation of cell cycle G2/M phase transition	1/61	26/17653	0.086125998	0.399649417	0.376984681	993	1
BP	GO:0006606	protein import into nucleus	2/61	143/17653	0.08753825	0.401697697	0.378916799	1026/55916	2
BP	GO:0010575	positive regulation of vascular endothelial growth factor production	1/61	27/17653	0.089288551	0.401697697	0.378916799	3572	1
BP	GO:0031167	rRNA methylation	1/61	27/17653	0.089288551	0.401697697	0.378916799	154743	1
BP	GO:0036336	dendritic cell migration	1/61	27/17653	0.089288551	0.401697697	0.378916799	1236	1
BP	GO:0048240	sperm capacitation	1/61	27/17653	0.089288551	0.401697697	0.378916799	11057	1
BP	GO:1901652	response to peptide	4/61	491/17653	0.089584193	0.401697697	0.378916799	130399/55023/5567/143686	4
BP	GO:0044344	cellular response to fibroblast growth factor stimulus	2/61	145/17653	0.089626118	0.401697697	0.378916799	8036/161742	2
BP	GO:0071496	cellular response to external stimulus	3/61	307/17653	0.089887451	0.401697697	0.378916799	154743/1026/143686	3
BP	GO:0048515	spermatid differentiation	2/61	146/17653	0.090675642	0.401697697	0.378916799	11057/6895	2
BP	GO:0009991	response to extracellular stimulus	4/61	495/17653	0.091633967	0.401697697	0.378916799	130399/154743/1026/143686	4
BP	GO:0007338	single fertilization	2/61	147/17653	0.091728842	0.401697697	0.378916799	11057/6895	2
BP	GO:0034377	plasma lipoprotein particle assembly	1/61	28/17653	0.092440338	0.401697697	0.378916799	5567	1
BP	GO:0046134	pyrimidine nucleoside biosynthetic process	1/61	28/17653	0.092440338	0.401697697	0.378916799	51727	1
BP	GO:0048710	regulation of astrocyte differentiation	1/61	28/17653	0.092440338	0.401697697	0.378916799	3572	1
BP	GO:0071480	cellular response to gamma radiation	1/61	28/17653	0.092440338	0.401697697	0.378916799	1026	1
BP	GO:1904292	regulation of ERAD pathway	1/61	28/17653	0.092440338	0.401697697	0.378916799	55432	1
BP	GO:2000146	negative regulation of cell motility	3/61	311/17653	0.092579582	0.401697697	0.378916799	11057/130399/161742	3
BP	GO:0071375	cellular response to peptide hormone stimulus	3/61	312/17653	0.093257885	0.401697697	0.378916799	55023/5567/143686	3
BP	GO:0002673	regulation of acute inflammatory response	2/61	149/17653	0.093846125	0.401697697	0.378916799	1236/3572	2
BP	GO:0051251	positive regulation of lymphocyte activation	3/61	315/17653	0.095305321	0.401697697	0.378916799	1236/1026/3572	3
BP	GO:0000083	regulation of transcription involved in G1/S transition of mitotic cell cycle	1/61	29/17653	0.095581396	0.401697697	0.378916799	4863	1
BP	GO:0030262	apoptotic nuclear changes	1/61	29/17653	0.095581396	0.401697697	0.378916799	130399	1
BP	GO:0030970	retrograde protein transport, ER to cytosol	1/61	29/17653	0.095581396	0.401697697	0.378916799	55432	1
BP	GO:1903513	endoplasmic reticulum to cytosol transport	1/61	29/17653	0.095581396	0.401697697	0.378916799	55432	1
BP	GO:0032874	positive regulation of stress-activated MAPK cascade	2/61	151/17653	0.095977675	0.401697697	0.378916799	1236/8322	2
BP	GO:0070304	positive regulation of stress-activated protein kinase signaling cascade	2/61	152/17653	0.09704871	0.401697697	0.378916799	1236/8322	2
BP	GO:0071774	response to fibroblast growth factor	2/61	152/17653	0.09704871	0.401697697	0.378916799	8036/161742	2
BP	GO:0010569	regulation of double-strand break repair via homologous recombination	1/61	30/17653	0.09871176	0.401697697	0.378916799	10721	1
BP	GO:0036296	response to increased oxygen levels	1/61	30/17653	0.09871176	0.401697697	0.378916799	1026	1
BP	GO:0043516	regulation of DNA damage response, signal transduction by p53 class mediator	1/61	30/17653	0.09871176	0.401697697	0.378916799	161742	1
BP	GO:0043552	positive regulation of phosphatidylinositol 3-kinase activity	1/61	30/17653	0.09871176	0.401697697	0.378916799	1236	1
BP	GO:0045879	negative regulation of smoothened signaling pathway	1/61	30/17653	0.09871176	0.401697697	0.378916799	5567	1
BP	GO:0046685	response to arsenic-containing substance	1/61	30/17653	0.09871176	0.401697697	0.378916799	1026	1
BP	GO:0051385	response to mineralocorticoid	1/61	30/17653	0.09871176	0.401697697	0.378916799	1026	1
BP	GO:0051491	positive regulation of filopodium assembly	1/61	30/17653	0.09871176	0.401697697	0.378916799	1236	1
BP	GO:0065005	protein-lipid complex assembly	1/61	30/17653	0.09871176	0.401697697	0.378916799	5567	1
BP	GO:0070536	protein K63-linked deubiquitination	1/61	30/17653	0.09871176	0.401697697	0.378916799	55432	1
BP	GO:0071108	protein K48-linked deubiquitination	1/61	30/17653	0.09871176	0.401697697	0.378916799	55432	1
BP	GO:0090023	positive regulation of neutrophil chemotaxis	1/61	30/17653	0.09871176	0.401697697	0.378916799	1236	1
BP	GO:0003401	axis elongation	1/61	31/17653	0.101831466	0.40462434	0.381677468	85407	1
BP	GO:0006921	cellular component disassembly involved in execution phase of apoptosis	1/61	31/17653	0.101831466	0.40462434	0.381677468	130399	1
BP	GO:0034694	response to prostaglandin	1/61	31/17653	0.101831466	0.40462434	0.381677468	1236	1
BP	GO:0045736	negative regulation of cyclin-dependent protein serine/threonine kinase activity	1/61	31/17653	0.101831466	0.40462434	0.381677468	1026	1
BP	GO:0051897	positive regulation of protein kinase B signaling	2/61	157/17653	0.102455045	0.40462434	0.381677468	1236/3092	2
BP	GO:0120032	regulation of plasma membrane bounded cell projection assembly	2/61	159/17653	0.104640798	0.40462434	0.381677468	55704/1236	2
BP	GO:0010574	regulation of vascular endothelial growth factor production	1/61	32/17653	0.10494055	0.40462434	0.381677468	3572	1
BP	GO:0030947	regulation of vascular endothelial growth factor receptor signaling pathway	1/61	32/17653	0.10494055	0.40462434	0.381677468	8322	1
BP	GO:0032735	positive regulation of interleukin-12 production	1/61	32/17653	0.10494055	0.40462434	0.381677468	1236	1
BP	GO:0042987	amyloid precursor protein catabolic process	1/61	32/17653	0.10494055	0.40462434	0.381677468	6653	1
BP	GO:0071354	cellular response to interleukin-6	1/61	32/17653	0.10494055	0.40462434	0.381677468	3572	1
BP	GO:0071624	positive regulation of granulocyte chemotaxis	1/61	32/17653	0.10494055	0.40462434	0.381677468	1236	1
BP	GO:0001101	response to acid chemical	3/61	329/17653	0.105102863	0.40462434	0.381677468	1236/8322/143686	3
BP	GO:0006898	receptor-mediated endocytosis	3/61	330/17653	0.105817637	0.40462434	0.381677468	3092/53353/6653	3
BP	GO:0032956	regulation of actin cytoskeleton organization	3/61	331/17653	0.106534361	0.40462434	0.381677468	55704/1236/1073	3
BP	GO:0060491	regulation of cell projection assembly	2/61	161/17653	0.106839401	0.40462434	0.381677468	55704/1236	2
BP	GO:0006221	pyrimidine nucleotide biosynthetic process	1/61	33/17653	0.108039048	0.40462434	0.381677468	51727	1
BP	GO:0015949	nucleobase-containing small molecule interconversion	1/61	33/17653	0.108039048	0.40462434	0.381677468	51727	1
BP	GO:0019433	triglyceride catabolic process	1/61	33/17653	0.108039048	0.40462434	0.381677468	11343	1
BP	GO:0046131	pyrimidine ribonucleoside metabolic process	1/61	33/17653	0.108039048	0.40462434	0.381677468	51727	1
BP	GO:0090218	positive regulation of lipid kinase activity	1/61	33/17653	0.108039048	0.40462434	0.381677468	1236	1
BP	GO:0097120	receptor localization to synapse	1/61	33/17653	0.108039048	0.40462434	0.381677468	6809	1
BP	GO:1902624	positive regulation of neutrophil migration	1/61	33/17653	0.108039048	0.40462434	0.381677468	1236	1
BP	GO:1904030	negative regulation of cyclin-dependent protein kinase activity	1/61	33/17653	0.108039048	0.40462434	0.381677468	1026	1
BP	GO:0016241	regulation of macroautophagy	2/61	164/17653	0.110160802	0.40462434	0.381677468	143686/9559	2
BP	GO:0051170	import into nucleus	2/61	164/17653	0.110160802	0.40462434	0.381677468	1026/55916	2
BP	GO:0010573	vascular endothelial growth factor production	1/61	34/17653	0.111126994	0.40462434	0.381677468	3572	1
BP	GO:0032148	activation of protein kinase B activity	1/61	34/17653	0.111126994	0.40462434	0.381677468	55704	1
BP	GO:0043243	positive regulation of protein complex disassembly	1/61	34/17653	0.111126994	0.40462434	0.381677468	1073	1
BP	GO:0045070	positive regulation of viral genome replication	1/61	34/17653	0.111126994	0.40462434	0.381677468	6895	1
BP	GO:0051930	regulation of sensory perception of pain	1/61	34/17653	0.111126994	0.40462434	0.381677468	11343	1
BP	GO:0051931	regulation of sensory perception	1/61	34/17653	0.111126994	0.40462434	0.381677468	11343	1
BP	GO:2000008	regulation of protein localization to cell surface	1/61	34/17653	0.111126994	0.40462434	0.381677468	6809	1
BP	GO:0048469	cell maturation	2/61	165/17653	0.111274066	0.40462434	0.381677468	11057/1026	2
BP	GO:0051271	negative regulation of cellular component movement	3/61	340/17653	0.113071324	0.40462434	0.381677468	11057/130399/161742	3
BP	GO:0051224	negative regulation of protein transport	2/61	167/17653	0.113509589	0.40462434	0.381677468	130399/55432	2
BP	GO:0003091	renal water homeostasis	1/61	35/17653	0.114204425	0.40462434	0.381677468	5567	1
BP	GO:0010165	response to X-ray	1/61	35/17653	0.114204425	0.40462434	0.381677468	1026	1
BP	GO:0032456	endocytic recycling	1/61	35/17653	0.114204425	0.40462434	0.381677468	6653	1
BP	GO:0048713	regulation of oligodendrocyte differentiation	1/61	35/17653	0.114204425	0.40462434	0.381677468	23500	1
BP	GO:0050435	amyloid-beta metabolic process	1/61	35/17653	0.114204425	0.40462434	0.381677468	6653	1
BP	GO:0090022	regulation of neutrophil chemotaxis	1/61	35/17653	0.114204425	0.40462434	0.381677468	1236	1
BP	GO:0046328	regulation of JNK cascade	2/61	169/17653	0.115756885	0.40462434	0.381677468	1236/8322	2
BP	GO:0043405	regulation of MAP kinase activity	3/61	344/17653	0.1160256	0.40462434	0.381677468	8322/6653/161742	3
BP	GO:0030308	negative regulation of cell growth	2/61	170/17653	0.116884866	0.40462434	0.381677468	1026/29946	2
BP	GO:0035418	protein localization to synapse	1/61	36/17653	0.117271375	0.40462434	0.381677468	6809	1
BP	GO:0050856	regulation of T cell receptor signaling pathway	1/61	36/17653	0.117271375	0.40462434	0.381677468	1236	1
BP	GO:0070741	response to interleukin-6	1/61	36/17653	0.117271375	0.40462434	0.381677468	3572	1
BP	GO:0010921	regulation of phosphatase activity	2/61	171/17653	0.118015693	0.40462434	0.381677468	8036/161742	2
BP	GO:1904950	negative regulation of establishment of protein localization	2/61	171/17653	0.118015693	0.40462434	0.381677468	130399/55432	2
BP	GO:1903829	positive regulation of cellular protein localization	3/61	347/17653	0.118260621	0.40462434	0.381677468	55704/6653/6809	3
BP	GO:0043901	negative regulation of multi-organism process	2/61	172/17653	0.119149332	0.40462434	0.381677468	130399/6895	2
BP	GO:0050707	regulation of cytokine secretion	2/61	172/17653	0.119149332	0.40462434	0.381677468	1236/192683	2
BP	GO:0090090	negative regulation of canonical Wnt signaling pathway	2/61	172/17653	0.119149332	0.40462434	0.381677468	85407/169200	2
BP	GO:0043409	negative regulation of MAPK cascade	2/61	173/17653	0.120285753	0.40462434	0.381677468	6653/161742	2
BP	GO:0061136	regulation of proteasomal protein catabolic process	2/61	173/17653	0.120285753	0.40462434	0.381677468	160418/55432	2
BP	GO:0007340	acrosome reaction	1/61	37/17653	0.12032788	0.40462434	0.381677468	11057	1
BP	GO:0042149	cellular response to glucose starvation	1/61	37/17653	0.12032788	0.40462434	0.381677468	143686	1
BP	GO:0045124	regulation of bone resorption	1/61	37/17653	0.12032788	0.40462434	0.381677468	169200	1
BP	GO:0045742	positive regulation of epidermal growth factor receptor signaling pathway	1/61	37/17653	0.12032788	0.40462434	0.381677468	3092	1
BP	GO:0061512	protein localization to cilium	1/61	37/17653	0.12032788	0.40462434	0.381677468	55704	1
BP	GO:0002696	positive regulation of leukocyte activation	3/61	351/17653	0.121265978	0.40462434	0.381677468	1236/1026/3572	3
BP	GO:0031346	positive regulation of cell projection organization	3/61	353/17653	0.122779363	0.40462434	0.381677468	55704/1236/8322	3
BP	GO:0040013	negative regulation of locomotion	3/61	353/17653	0.122779363	0.40462434	0.381677468	11057/130399/161742	3
BP	GO:1901653	cellular response to peptide	3/61	353/17653	0.122779363	0.40462434	0.381677468	55023/5567/143686	3
BP	GO:0007223	Wnt signaling pathway, calcium modulating pathway	1/61	38/17653	0.123373974	0.40462434	0.381677468	8322	1
BP	GO:0010559	regulation of glycoprotein biosynthetic process	1/61	38/17653	0.123373974	0.40462434	0.381677468	1236	1
BP	GO:0045022	early endosome to late endosome transport	1/61	38/17653	0.123373974	0.40462434	0.381677468	64089	1
BP	GO:0045687	positive regulation of glial cell differentiation	1/61	38/17653	0.123373974	0.40462434	0.381677468	3572	1
BP	GO:0046676	negative regulation of insulin secretion	1/61	38/17653	0.123373974	0.40462434	0.381677468	130399	1
BP	GO:0050691	regulation of defense response to virus by host	1/61	38/17653	0.123373974	0.40462434	0.381677468	6895	1
BP	GO:0050706	regulation of interleukin-1 beta secretion	1/61	38/17653	0.123373974	0.40462434	0.381677468	1236	1
BP	GO:0090311	regulation of protein deacetylation	1/61	38/17653	0.123373974	0.40462434	0.381677468	161742	1
BP	GO:0090317	negative regulation of intracellular protein transport	1/61	38/17653	0.123373974	0.40462434	0.381677468	55432	1
BP	GO:1902622	regulation of neutrophil migration	1/61	38/17653	0.123373974	0.40462434	0.381677468	1236	1
BP	GO:0021532	neural tube patterning	1/61	39/17653	0.126409693	0.40462434	0.381677468	5567	1
BP	GO:0033146	regulation of intracellular estrogen receptor signaling pathway	1/61	39/17653	0.126409693	0.40462434	0.381677468	8085	1
BP	GO:0048009	insulin-like growth factor receptor signaling pathway	1/61	39/17653	0.126409693	0.40462434	0.381677468	55023	1
BP	GO:0071377	cellular response to glucagon stimulus	1/61	39/17653	0.126409693	0.40462434	0.381677468	5567	1
BP	GO:0072583	clathrin-dependent endocytosis	1/61	39/17653	0.126409693	0.40462434	0.381677468	3092	1
BP	GO:1901186	positive regulation of ERBB signaling pathway	1/61	39/17653	0.126409693	0.40462434	0.381677468	3092	1
BP	GO:0071478	cellular response to radiation	2/61	180/17653	0.128315905	0.40462434	0.381677468	993/1026	2
BP	GO:0000154	rRNA modification	1/61	40/17653	0.129435071	0.40462434	0.381677468	154743	1
BP	GO:0010613	positive regulation of cardiac muscle hypertrophy	1/61	40/17653	0.129435071	0.40462434	0.381677468	3572	1
BP	GO:0014014	negative regulation of gliogenesis	1/61	40/17653	0.129435071	0.40462434	0.381677468	23500	1
BP	GO:0014742	positive regulation of muscle hypertrophy	1/61	40/17653	0.129435071	0.40462434	0.381677468	3572	1
BP	GO:0097028	dendritic cell differentiation	1/61	40/17653	0.129435071	0.40462434	0.381677468	1236	1
BP	GO:1904031	positive regulation of cyclin-dependent protein kinase activity	1/61	40/17653	0.129435071	0.40462434	0.381677468	1026	1
BP	GO:0008064	regulation of actin polymerization or depolymerization	2/61	181/17653	0.12947344	0.40462434	0.381677468	1236/1073	2
BP	GO:1905330	regulation of morphogenesis of an epithelium	2/61	181/17653	0.12947344	0.40462434	0.381677468	8322/85407	2
BP	GO:0050867	positive regulation of cell activation	3/61	363/17653	0.130450699	0.40462434	0.381677468	1236/1026/3572	3
BP	GO:0030832	regulation of actin filament length	2/61	182/17653	0.130633474	0.40462434	0.381677468	1236/1073	2
BP	GO:0009566	fertilization	2/61	183/17653	0.131795979	0.40462434	0.381677468	11057/6895	2
BP	GO:0009112	nucleobase metabolic process	1/61	41/17653	0.132450143	0.40462434	0.381677468	51727	1
BP	GO:0010799	regulation of peptidyl-threonine phosphorylation	1/61	41/17653	0.132450143	0.40462434	0.381677468	161742	1
BP	GO:0042455	ribonucleoside biosynthetic process	1/61	41/17653	0.132450143	0.40462434	0.381677468	51727	1
BP	GO:0045026	plasma membrane fusion	1/61	41/17653	0.132450143	0.40462434	0.381677468	6809	1
BP	GO:0072595	maintenance of protein localization in organelle	1/61	41/17653	0.132450143	0.40462434	0.381677468	23345	1
BP	GO:0030278	regulation of ossification	2/61	185/17653	0.134128278	0.40462434	0.381677468	3572/169200	2
BP	GO:2001020	regulation of response to DNA damage stimulus	2/61	186/17653	0.135298012	0.40462434	0.381677468	10721/161742	2
BP	GO:0030890	positive regulation of B cell proliferation	1/61	42/17653	0.135454943	0.40462434	0.381677468	1026	1
BP	GO:0032459	regulation of protein oligomerization	1/61	42/17653	0.135454943	0.40462434	0.381677468	6653	1
BP	GO:0032924	activin receptor signaling pathway	1/61	42/17653	0.135454943	0.40462434	0.381677468	130399	1
BP	GO:0035196	production of miRNAs involved in gene silencing by miRNA	1/61	42/17653	0.135454943	0.40462434	0.381677468	6895	1
BP	GO:0051489	regulation of filopodium assembly	1/61	42/17653	0.135454943	0.40462434	0.381677468	1236	1
BP	GO:0090051	negative regulation of cell migration involved in sprouting angiogenesis	1/61	42/17653	0.135454943	0.40462434	0.381677468	161742	1
BP	GO:0001754	eye photoreceptor cell differentiation	1/61	43/17653	0.138449506	0.40462434	0.381677468	85407	1
BP	GO:0002437	inflammatory response to antigenic stimulus	1/61	43/17653	0.138449506	0.40462434	0.381677468	1236	1
BP	GO:0002832	negative regulation of response to biotic stimulus	1/61	43/17653	0.138449506	0.40462434	0.381677468	6895	1
BP	GO:0006284	base-excision repair	1/61	43/17653	0.138449506	0.40462434	0.381677468	10721	1
BP	GO:0022602	ovulation cycle process	1/61	43/17653	0.138449506	0.40462434	0.381677468	8322	1
BP	GO:0034105	positive regulation of tissue remodeling	1/61	43/17653	0.138449506	0.40462434	0.381677468	169200	1
BP	GO:0042771	intrinsic apoptotic signaling pathway in response to DNA damage by p53 class mediator	1/61	43/17653	0.138449506	0.40462434	0.381677468	1026	1
BP	GO:0045668	negative regulation of osteoblast differentiation	1/61	43/17653	0.138449506	0.40462434	0.381677468	169200	1
BP	GO:0046326	positive regulation of glucose import	1/61	43/17653	0.138449506	0.40462434	0.381677468	1389	1
BP	GO:0051445	regulation of meiotic cell cycle	1/61	43/17653	0.138449506	0.40462434	0.381677468	5567	1
BP	GO:0072528	pyrimidine-containing compound biosynthetic process	1/61	43/17653	0.138449506	0.40462434	0.381677468	51727	1
BP	GO:0090278	negative regulation of peptide hormone secretion	1/61	43/17653	0.138449506	0.40462434	0.381677468	130399	1
BP	GO:1902017	regulation of cilium assembly	1/61	43/17653	0.138449506	0.40462434	0.381677468	55704	1
BP	GO:1903573	negative regulation of response to endoplasmic reticulum stress	1/61	43/17653	0.138449506	0.40462434	0.381677468	55432	1
BP	GO:1903727	positive regulation of phospholipid metabolic process	1/61	43/17653	0.138449506	0.40462434	0.381677468	1236	1
BP	GO:0010810	regulation of cell-substrate adhesion	2/61	191/17653	0.141181353	0.40462434	0.381677468	1236/8322	2
BP	GO:0043401	steroid hormone mediated signaling pathway	2/61	191/17653	0.141181353	0.40462434	0.381677468	11057/8085	2
BP	GO:0048599	oocyte development	1/61	44/17653	0.141433866	0.40462434	0.381677468	8085	1
BP	GO:0050702	interleukin-1 beta secretion	1/61	44/17653	0.141433866	0.40462434	0.381677468	1236	1
BP	GO:0050704	regulation of interleukin-1 secretion	1/61	44/17653	0.141433866	0.40462434	0.381677468	1236	1
BP	GO:0010876	lipid localization	3/61	377/17653	0.141470775	0.40462434	0.381677468	130399/8322/6653	3
BP	GO:0032970	regulation of actin filament-based process	3/61	377/17653	0.141470775	0.40462434	0.381677468	55704/1236/1073	3
BP	GO:0045787	positive regulation of cell cycle	3/61	377/17653	0.141470775	0.40462434	0.381677468	993/1026/55023	3
BP	GO:0032011	ARF protein signal transduction	1/61	45/17653	0.144408058	0.40462434	0.381677468	23362	1
BP	GO:0032012	regulation of ARF protein signal transduction	1/61	45/17653	0.144408058	0.40462434	0.381677468	23362	1
BP	GO:0032570	response to progesterone	1/61	45/17653	0.144408058	0.40462434	0.381677468	11057	1
BP	GO:0043551	regulation of phosphatidylinositol 3-kinase activity	1/61	45/17653	0.144408058	0.40462434	0.381677468	1236	1
BP	GO:0045058	T cell selection	1/61	45/17653	0.144408058	0.40462434	0.381677468	1236	1
BP	GO:0046850	regulation of bone remodeling	1/61	45/17653	0.144408058	0.40462434	0.381677468	169200	1
BP	GO:0071827	plasma lipoprotein particle organization	1/61	45/17653	0.144408058	0.40462434	0.381677468	5567	1
BP	GO:0097366	response to bronchodilator	1/61	45/17653	0.144408058	0.40462434	0.381677468	1236	1
BP	GO:1903018	regulation of glycoprotein metabolic process	1/61	45/17653	0.144408058	0.40462434	0.381677468	1236	1
BP	GO:1902905	positive regulation of supramolecular fiber organization	2/61	195/17653	0.14592789	0.40462434	0.381677468	1236/1073	2
BP	GO:0050663	cytokine secretion	2/61	196/17653	0.147119823	0.40462434	0.381677468	1236/192683	2
BP	GO:0000060	protein import into nucleus, translocation	1/61	46/17653	0.147372114	0.40462434	0.381677468	1026	1
BP	GO:0001954	positive regulation of cell-matrix adhesion	1/61	46/17653	0.147372114	0.40462434	0.381677468	1236	1
BP	GO:0031050	dsRNA fragmentation	1/61	46/17653	0.147372114	0.40462434	0.381677468	6895	1
BP	GO:0070918	production of small RNA involved in gene silencing by RNA	1/61	46/17653	0.147372114	0.40462434	0.381677468	6895	1
BP	GO:1901031	regulation of response to reactive oxygen species	1/61	46/17653	0.147372114	0.40462434	0.381677468	143686	1
BP	GO:0010001	glial cell differentiation	2/61	197/17653	0.14831382	0.40462434	0.381677468	23500/3572	2
BP	GO:0017038	protein import	2/61	198/17653	0.149509852	0.40462434	0.381677468	1026/55916	2
BP	GO:0006220	pyrimidine nucleotide metabolic process	1/61	47/17653	0.15032607	0.40462434	0.381677468	51727	1
BP	GO:0060976	coronary vasculature development	1/61	47/17653	0.15032607	0.40462434	0.381677468	161742	1
BP	GO:0060986	endocrine hormone secretion	1/61	47/17653	0.15032607	0.40462434	0.381677468	8322	1
BP	GO:0071622	regulation of granulocyte chemotaxis	1/61	47/17653	0.15032607	0.40462434	0.381677468	1236	1
BP	GO:0071825	protein-lipid complex subunit organization	1/61	47/17653	0.15032607	0.40462434	0.381677468	5567	1
BP	GO:1901799	negative regulation of proteasomal protein catabolic process	1/61	47/17653	0.15032607	0.40462434	0.381677468	55432	1
BP	GO:0035303	regulation of dephosphorylation	2/61	199/17653	0.150707892	0.40462434	0.381677468	8036/161742	2
BP	GO:0007254	JNK cascade	2/61	200/17653	0.151907913	0.40462434	0.381677468	1236/8322	2
BP	GO:0016197	endosomal transport	2/61	200/17653	0.151907913	0.40462434	0.381677468	6653/9559	2
BP	GO:0071229	cellular response to acid chemical	2/61	200/17653	0.151907913	0.40462434	0.381677468	8322/143686	2
BP	GO:0048545	response to steroid hormone	3/61	391/17653	0.152796957	0.40462434	0.381677468	11057/1026/8085	3
BP	GO:0032869	cellular response to insulin stimulus	2/61	201/17653	0.153109887	0.40462434	0.381677468	55023/143686	2
BP	GO:0050670	regulation of lymphocyte proliferation	2/61	201/17653	0.153109887	0.40462434	0.381677468	1026/3572	2
BP	GO:1903050	regulation of proteolysis involved in cellular protein catabolic process	2/61	201/17653	0.153109887	0.40462434	0.381677468	160418/55432	2
BP	GO:0006213	pyrimidine nucleoside metabolic process	1/61	48/17653	0.153269959	0.40462434	0.381677468	51727	1
BP	GO:0009163	nucleoside biosynthetic process	1/61	48/17653	0.153269959	0.40462434	0.381677468	51727	1
BP	GO:0010828	positive regulation of glucose transmembrane transport	1/61	48/17653	0.153269959	0.40462434	0.381677468	1389	1
BP	GO:0042982	amyloid precursor protein metabolic process	1/61	48/17653	0.153269959	0.40462434	0.381677468	6653	1
BP	GO:0045214	sarcomere organization	1/61	48/17653	0.153269959	0.40462434	0.381677468	1073	1
BP	GO:0048260	positive regulation of receptor-mediated endocytosis	1/61	48/17653	0.153269959	0.40462434	0.381677468	3092	1
BP	GO:1903307	positive regulation of regulated secretory pathway	1/61	48/17653	0.153269959	0.40462434	0.381677468	192683	1
BP	GO:0045785	positive regulation of cell adhesion	3/61	392/17653	0.153617074	0.40462434	0.381677468	1236/3572/6809	3
BP	GO:0032944	regulation of mononuclear cell proliferation	2/61	202/17653	0.154313786	0.40462434	0.381677468	1026/3572	2
BP	GO:0050920	regulation of chemotaxis	2/61	202/17653	0.154313786	0.40462434	0.381677468	1236/6809	2
BP	GO:0008154	actin polymerization or depolymerization	2/61	203/17653	0.155519585	0.40462434	0.381677468	1236/1073	2
BP	GO:0032386	regulation of intracellular transport	3/61	395/17653	0.156086009	0.40462434	0.381677468	1026/6653/55432	3
BP	GO:0006904	vesicle docking involved in exocytosis	1/61	49/17653	0.156203815	0.40462434	0.381677468	6809	1
BP	GO:0007029	endoplasmic reticulum organization	1/61	49/17653	0.156203815	0.40462434	0.381677468	23023	1
BP	GO:0009994	oocyte differentiation	1/61	49/17653	0.156203815	0.40462434	0.381677468	8085	1
BP	GO:0030834	regulation of actin filament depolymerization	1/61	49/17653	0.156203815	0.40462434	0.381677468	1073	1
BP	GO:0031529	ruffle organization	1/61	49/17653	0.156203815	0.40462434	0.381677468	1236	1
BP	GO:0045806	negative regulation of endocytosis	1/61	49/17653	0.156203815	0.40462434	0.381677468	192683	1
BP	GO:0046579	positive regulation of Ras protein signal transduction	1/61	49/17653	0.156203815	0.40462434	0.381677468	8036	1
BP	GO:2000107	negative regulation of leukocyte apoptotic process	1/61	49/17653	0.156203815	0.40462434	0.381677468	1236	1
BP	GO:0001649	osteoblast differentiation	2/61	205/17653	0.157936773	0.40717415	0.384082674	3572/169200	2
BP	GO:0007566	embryo implantation	1/61	50/17653	0.159127671	0.40717415	0.384082674	130399	1
BP	GO:0032655	regulation of interleukin-12 production	1/61	50/17653	0.159127671	0.40717415	0.384082674	1236	1
BP	GO:0042306	regulation of protein import into nucleus	1/61	50/17653	0.159127671	0.40717415	0.384082674	1026	1
BP	GO:0051568	histone H3-K4 methylation	1/61	50/17653	0.159127671	0.40717415	0.384082674	8085	1
BP	GO:1901659	glycosyl compound biosynthetic process	1/61	50/17653	0.159127671	0.40717415	0.384082674	51727	1
BP	GO:0051052	regulation of DNA metabolic process	3/61	399/17653	0.159397632	0.40717415	0.384082674	55704/1026/10721	3
BP	GO:0030178	negative regulation of Wnt signaling pathway	2/61	207/17653	0.160361237	0.408826078	0.385640919	85407/169200	2
BP	GO:0044242	cellular lipid catabolic process	2/61	208/17653	0.161576132	0.409869833	0.386625481	11057/11343	2
BP	GO:0002763	positive regulation of myeloid leukocyte differentiation	1/61	51/17653	0.162041562	0.409869833	0.386625481	169200	1
BP	GO:0033762	response to glucagon	1/61	51/17653	0.162041562	0.409869833	0.386625481	5567	1
BP	GO:0050701	interleukin-1 secretion	1/61	51/17653	0.162041562	0.409869833	0.386625481	1236	1
BP	GO:0071897	DNA biosynthetic process	2/61	209/17653	0.162792767	0.410771661	0.387476164	1026/10721	2
BP	GO:0045444	fat cell differentiation	2/61	210/17653	0.164011116	0.410771661	0.387476164	1389/169200	2
BP	GO:0030042	actin filament depolymerization	1/61	52/17653	0.16494552	0.410771661	0.387476164	1073	1
BP	GO:0032615	interleukin-12 production	1/61	52/17653	0.16494552	0.410771661	0.387476164	1236	1
BP	GO:0045840	positive regulation of mitotic nuclear division	1/61	52/17653	0.16494552	0.410771661	0.387476164	55023	1
BP	GO:0046626	regulation of insulin receptor signaling pathway	1/61	52/17653	0.16494552	0.410771661	0.387476164	143686	1
BP	GO:0048008	platelet-derived growth factor receptor signaling pathway	1/61	52/17653	0.16494552	0.410771661	0.387476164	3092	1
BP	GO:1903078	positive regulation of protein localization to plasma membrane	1/61	52/17653	0.16494552	0.410771661	0.387476164	6809	1
BP	GO:0070663	regulation of leukocyte proliferation	2/61	212/17653	0.166452856	0.413726751	0.390263668	1026/3572	2
BP	GO:0050870	positive regulation of T cell activation	2/61	213/17653	0.167676195	0.413973052	0.390496	1236/3572	2
BP	GO:0019369	arachidonic acid metabolic process	1/61	53/17653	0.167839578	0.413973052	0.390496	11343	1
BP	GO:0043550	regulation of lipid kinase activity	1/61	53/17653	0.167839578	0.413973052	0.390496	1236	1
BP	GO:0048146	positive regulation of fibroblast proliferation	1/61	53/17653	0.167839578	0.413973052	0.390496	1026	1
BP	GO:0001819	positive regulation of cytokine production	3/61	411/17653	0.169462577	0.413973052	0.390496	1236/3572/192683	3
BP	GO:0050727	regulation of inflammatory response	3/61	411/17653	0.169462577	0.413973052	0.390496	1236/3572/11343	3
BP	GO:0002526	acute inflammatory response	2/61	215/17653	0.170127685	0.413973052	0.390496	1236/3572	2
BP	GO:0002011	morphogenesis of an epithelial sheet	1/61	54/17653	0.17072377	0.413973052	0.390496	94134	1
BP	GO:0018208	peptidyl-proline modification	1/61	54/17653	0.17072377	0.413973052	0.390496	112399	1
BP	GO:0034394	protein localization to cell surface	1/61	54/17653	0.17072377	0.413973052	0.390496	6809	1
BP	GO:0050854	regulation of antigen receptor-mediated signaling pathway	1/61	54/17653	0.17072377	0.413973052	0.390496	1236	1
BP	GO:0051058	negative regulation of small GTPase mediated signal transduction	1/61	54/17653	0.17072377	0.413973052	0.390496	94134	1
BP	GO:1904589	regulation of protein import	1/61	54/17653	0.17072377	0.413973052	0.390496	1026	1
BP	GO:0032872	regulation of stress-activated MAPK cascade	2/61	216/17653	0.171355785	0.41472601	0.391206256	1236/8322	2
BP	GO:0051495	positive regulation of cytoskeleton organization	2/61	217/17653	0.172585423	0.416140554	0.39254058	1236/1073	2
BP	GO:0070302	regulation of stress-activated protein kinase signaling cascade	2/61	217/17653	0.172585423	0.416140554	0.39254058	1236/8322	2
BP	GO:0010332	response to gamma radiation	1/61	55/17653	0.17359813	0.417801469	0.394107302	1026	1
BP	GO:0046394	carboxylic acid biosynthetic process	3/61	419/17653	0.1762756	0.419994223	0.396175701	11057/586/11343	3
BP	GO:1901605	alpha-amino acid metabolic process	2/61	220/17653	0.176283316	0.419994223	0.396175701	586/112399	2
BP	GO:0008333	endosome to lysosome transport	1/61	56/17653	0.176462689	0.419994223	0.396175701	64089	1
BP	GO:0016445	somatic diversification of immunoglobulins	1/61	56/17653	0.176462689	0.419994223	0.396175701	10721	1
BP	GO:0031122	cytoplasmic microtubule organization	1/61	56/17653	0.176462689	0.419994223	0.396175701	55704	1
BP	GO:0051057	positive regulation of small GTPase mediated signal transduction	1/61	56/17653	0.176462689	0.419994223	0.396175701	8036	1
BP	GO:0016053	organic acid biosynthetic process	3/61	420/17653	0.177132763	0.420812641	0.396947706	11057/586/11343	3
BP	GO:0014015	positive regulation of gliogenesis	1/61	57/17653	0.179317481	0.422204513	0.398260643	3572	1
BP	GO:0045453	bone resorption	1/61	57/17653	0.179317481	0.422204513	0.398260643	169200	1
BP	GO:1903902	positive regulation of viral life cycle	1/61	57/17653	0.179317481	0.422204513	0.398260643	6895	1
BP	GO:0007389	pattern specification process	3/61	424/17653	0.18057336	0.422204513	0.398260643	23500/85407/5567	3
BP	GO:1903039	positive regulation of leukocyte cell-cell adhesion	2/61	224/17653	0.181233879	0.422204513	0.398260643	1236/3572	2
BP	GO:0002066	columnar/cuboidal epithelial cell development	1/61	58/17653	0.182162539	0.422204513	0.398260643	1026	1
BP	GO:0030520	intracellular estrogen receptor signaling pathway	1/61	58/17653	0.182162539	0.422204513	0.398260643	8085	1
BP	GO:0032651	regulation of interleukin-1 beta production	1/61	58/17653	0.182162539	0.422204513	0.398260643	1236	1
BP	GO:0046530	photoreceptor cell differentiation	1/61	58/17653	0.182162539	0.422204513	0.398260643	85407	1
BP	GO:0046847	filopodium assembly	1/61	58/17653	0.182162539	0.422204513	0.398260643	1236	1
BP	GO:1904377	positive regulation of protein localization to cell periphery	1/61	58/17653	0.182162539	0.422204513	0.398260643	6809	1
BP	GO:2000779	regulation of double-strand break repair	1/61	58/17653	0.182162539	0.422204513	0.398260643	10721	1
BP	GO:0001667	ameboidal-type cell migration	3/61	426/17653	0.182300708	0.422204513	0.398260643	130399/2196/161742	3
BP	GO:0050708	regulation of protein secretion	3/61	426/17653	0.182300708	0.422204513	0.398260643	130399/1236/192683	3
BP	GO:0000302	response to reactive oxygen species	2/61	227/17653	0.184960996	0.426918218	0.402707026	1236/143686	2
BP	GO:0032387	negative regulation of intracellular transport	1/61	59/17653	0.184997894	0.426918218	0.402707026	55432	1
BP	GO:0030100	regulation of endocytosis	2/61	229/17653	0.187452148	0.430359537	0.405953182	3092/192683	2
BP	GO:0010812	negative regulation of cell-substrate adhesion	1/61	60/17653	0.187823581	0.430359537	0.405953182	8322	1
BP	GO:0045669	positive regulation of osteoblast differentiation	1/61	60/17653	0.187823581	0.430359537	0.405953182	3572	1
BP	GO:1903051	negative regulation of proteolysis involved in cellular protein catabolic process	1/61	60/17653	0.187823581	0.430359537	0.405953182	55432	1
BP	GO:1903362	regulation of cellular protein catabolic process	2/61	231/17653	0.18994821	0.434101929	0.409483337	160418/55432	2
BP	GO:0023061	signal release	3/61	435/17653	0.190129915	0.434101929	0.409483337	130399/8322/6809	3
BP	GO:0030888	regulation of B cell proliferation	1/61	61/17653	0.190639631	0.434496685	0.409855706	1026	1
BP	GO:0006977	DNA damage response, signal transduction by p53 class mediator resulting in cell cycle arrest	1/61	62/17653	0.193446076	0.439146631	0.414241946	1026	1
BP	GO:0016239	positive regulation of macroautophagy	1/61	62/17653	0.193446076	0.439146631	0.414241946	143686	1
BP	GO:0009755	hormone-mediated signaling pathway	2/61	234/17653	0.193701111	0.439146631	0.414241946	11057/8085	2
BP	GO:0030032	lamellipodium assembly	1/61	63/17653	0.196242949	0.439502437	0.414577574	55704	1
BP	GO:0046888	negative regulation of hormone secretion	1/61	63/17653	0.196242949	0.439502437	0.414577574	130399	1
BP	GO:0051785	positive regulation of nuclear division	1/61	63/17653	0.196242949	0.439502437	0.414577574	55023	1
BP	GO:0071230	cellular response to amino acid stimulus	1/61	63/17653	0.196242949	0.439502437	0.414577574	143686	1
BP	GO:0072431	signal transduction involved in mitotic G1 DNA damage checkpoint	1/61	63/17653	0.196242949	0.439502437	0.414577574	1026	1
BP	GO:1901607	alpha-amino acid biosynthetic process	1/61	63/17653	0.196242949	0.439502437	0.414577574	586	1
BP	GO:1902400	intracellular signal transduction involved in G1 DNA damage checkpoint	1/61	63/17653	0.196242949	0.439502437	0.414577574	1026	1
BP	GO:0019915	lipid storage	1/61	64/17653	0.199030281	0.441908886	0.416847549	130399	1
BP	GO:0042698	ovulation cycle	1/61	64/17653	0.199030281	0.441908886	0.416847549	8322	1
BP	GO:0046782	regulation of viral transcription	1/61	64/17653	0.199030281	0.441908886	0.416847549	6895	1
BP	GO:0046889	positive regulation of lipid biosynthetic process	1/61	64/17653	0.199030281	0.441908886	0.416847549	1389	1
BP	GO:0050891	multicellular organismal water homeostasis	1/61	64/17653	0.199030281	0.441908886	0.416847549	5567	1
BP	GO:0033077	T cell differentiation in thymus	1/61	65/17653	0.201808105	0.445012745	0.419775384	1236	1
BP	GO:0072413	signal transduction involved in mitotic cell cycle checkpoint	1/61	65/17653	0.201808105	0.445012745	0.419775384	1026	1
BP	GO:1902402	signal transduction involved in mitotic DNA damage checkpoint	1/61	65/17653	0.201808105	0.445012745	0.419775384	1026	1
BP	GO:1902403	signal transduction involved in mitotic DNA integrity checkpoint	1/61	65/17653	0.201808105	0.445012745	0.419775384	1026	1
BP	GO:0046486	glycerolipid metabolic process	3/61	450/17653	0.203370025	0.446096755	0.420797918	11057/55500/11343	3
BP	GO:0001756	somitogenesis	1/61	66/17653	0.204576454	0.446096755	0.420797918	85407	1
BP	GO:0010611	regulation of cardiac muscle hypertrophy	1/61	66/17653	0.204576454	0.446096755	0.420797918	3572	1
BP	GO:0045670	regulation of osteoclast differentiation	1/61	66/17653	0.204576454	0.446096755	0.420797918	169200	1
BP	GO:0046324	regulation of glucose import	1/61	66/17653	0.204576454	0.446096755	0.420797918	1389	1
BP	GO:1902117	positive regulation of organelle assembly	1/61	66/17653	0.204576454	0.446096755	0.420797918	55704	1
BP	GO:0045637	regulation of myeloid cell differentiation	2/61	244/17653	0.206279917	0.446096755	0.420797918	8085/169200	2
BP	GO:0046578	regulation of Ras protein signal transduction	2/61	244/17653	0.206279917	0.446096755	0.420797918	23362/8036	2
BP	GO:0002200	somatic diversification of immune receptors	1/61	67/17653	0.207335357	0.446096755	0.420797918	10721	1
BP	GO:0032611	interleukin-1 beta production	1/61	67/17653	0.207335357	0.446096755	0.420797918	1236	1
BP	GO:0042531	positive regulation of tyrosine phosphorylation of STAT protein	1/61	67/17653	0.207335357	0.446096755	0.420797918	3572	1
BP	GO:0070373	negative regulation of ERK1 and ERK2 cascade	1/61	67/17653	0.207335357	0.446096755	0.420797918	161742	1
BP	GO:0071359	cellular response to dsRNA	1/61	67/17653	0.207335357	0.446096755	0.420797918	6895	1
BP	GO:0071479	cellular response to ionizing radiation	1/61	67/17653	0.207335357	0.446096755	0.420797918	1026	1
BP	GO:0031503	protein-containing complex localization	2/61	245/17653	0.207543093	0.446096755	0.420797918	3092/6809	2
BP	GO:0002791	regulation of peptide secretion	3/61	455/17653	0.207832674	0.446096755	0.420797918	130399/1236/192683	3
BP	GO:0051249	regulation of lymphocyte activation	3/61	457/17653	0.209624223	0.44794951	0.422545601	1236/1026/3572	3
BP	GO:0014743	regulation of muscle hypertrophy	1/61	68/17653	0.210084848	0.44794951	0.422545601	3572	1
BP	GO:0030104	water homeostasis	1/61	68/17653	0.210084848	0.44794951	0.422545601	5567	1
BP	GO:0050688	regulation of defense response to virus	1/61	68/17653	0.210084848	0.44794951	0.422545601	6895	1
BP	GO:0051051	negative regulation of transport	3/61	460/17653	0.212318302	0.449335834	0.423853304	130399/192683/55432	3
BP	GO:2000027	regulation of organ morphogenesis	2/61	249/17653	0.212604371	0.449335834	0.423853304	8322/85407	2
BP	GO:0030239	myofibril assembly	1/61	69/17653	0.212824957	0.449335834	0.423853304	1073	1
BP	GO:0048708	astrocyte differentiation	1/61	69/17653	0.212824957	0.449335834	0.423853304	3572	1
BP	GO:0071300	cellular response to retinoic acid	1/61	69/17653	0.212824957	0.449335834	0.423853304	8322	1
BP	GO:2001021	negative regulation of response to DNA damage stimulus	1/61	69/17653	0.212824957	0.449335834	0.423853304	10721	1
BP	GO:0016311	dephosphorylation	3/61	461/17653	0.213218098	0.449430305	0.423942417	993/8036/161742	3
BP	GO:0000086	G2/M transition of mitotic cell cycle	2/61	250/17653	0.213871731	0.450072648	0.424548333	993/1026	2
BP	GO:0001510	RNA methylation	1/61	70/17653	0.215555717	0.451246048	0.425655187	154743	1
BP	GO:0043507	positive regulation of JUN kinase activity	1/61	70/17653	0.215555717	0.451246048	0.425655187	8322	1
BP	GO:0048278	vesicle docking	1/61	70/17653	0.215555717	0.451246048	0.425655187	6809	1
BP	GO:0031349	positive regulation of defense response	3/61	466/17653	0.21773	0.451246048	0.425655187	1236/3572/5567	3
BP	GO:0030279	negative regulation of ossification	1/61	71/17653	0.218277158	0.451246048	0.425655187	169200	1
BP	GO:0031571	mitotic G1 DNA damage checkpoint	1/61	71/17653	0.218277158	0.451246048	0.425655187	1026	1
BP	GO:0031644	regulation of neurological system process	1/61	71/17653	0.218277158	0.451246048	0.425655187	11343	1
BP	GO:0044819	mitotic G1/S transition checkpoint	1/61	71/17653	0.218277158	0.451246048	0.425655187	1026	1
BP	GO:0090398	cellular senescence	1/61	71/17653	0.218277158	0.451246048	0.425655187	1026	1
BP	GO:1900076	regulation of cellular response to insulin stimulus	1/61	71/17653	0.218277158	0.451246048	0.425655187	143686	1
BP	GO:1903363	negative regulation of cellular protein catabolic process	1/61	71/17653	0.218277158	0.451246048	0.425655187	55432	1
BP	GO:0110053	regulation of actin filament organization	2/61	254/17653	0.218948733	0.451910186	0.42628166	1236/1073	2
BP	GO:0032652	regulation of interleukin-1 production	1/61	72/17653	0.220989312	0.454667006	0.428882137	1236	1
BP	GO:0044783	G1 DNA damage checkpoint	1/61	72/17653	0.220989312	0.454667006	0.428882137	1026	1
BP	GO:0021700	developmental maturation	2/61	256/17653	0.221491492	0.454974561	0.42917225	11057/1026	2
BP	GO:0022409	positive regulation of cell-cell adhesion	2/61	257/17653	0.222763867	0.455997376	0.430137059	1236/3572	2
BP	GO:0000018	regulation of DNA recombination	1/61	73/17653	0.22369221	0.455997376	0.430137059	10721	1
BP	GO:0009988	cell-cell recognition	1/61	73/17653	0.22369221	0.455997376	0.430137059	1236	1
BP	GO:0060291	long-term synaptic potentiation	1/61	73/17653	0.22369221	0.455997376	0.430137059	6809	1
BP	GO:0050768	negative regulation of neurogenesis	2/61	259/17653	0.225310511	0.455997376	0.430137059	23500/6653	2
BP	GO:0014910	regulation of smooth muscle cell migration	1/61	74/17653	0.226385883	0.455997376	0.430137059	6653	1
BP	GO:0030433	ubiquitin-dependent ERAD pathway	1/61	74/17653	0.226385883	0.455997376	0.430137059	55432	1
BP	GO:0043462	regulation of ATPase activity	1/61	74/17653	0.226385883	0.455997376	0.430137059	169200	1
BP	GO:0043627	response to estrogen	1/61	74/17653	0.226385883	0.455997376	0.430137059	8085	1
BP	GO:1903725	regulation of phospholipid metabolic process	1/61	74/17653	0.226385883	0.455997376	0.430137059	1236	1
BP	GO:0042063	gliogenesis	2/61	260/17653	0.226584742	0.455997376	0.430137059	23500/3572	2
BP	GO:0046651	lymphocyte proliferation	2/61	260/17653	0.226584742	0.455997376	0.430137059	1026/3572	2
BP	GO:0071383	cellular response to steroid hormone stimulus	2/61	260/17653	0.226584742	0.455997376	0.430137059	11057/8085	2
BP	GO:0016049	cell growth	3/61	477/17653	0.227728109	0.456772339	0.430868073	1026/8085/29946	3
BP	GO:0008589	regulation of smoothened signaling pathway	1/61	75/17653	0.229070363	0.456772339	0.430868073	5567	1
BP	GO:0033143	regulation of intracellular steroid hormone receptor signaling pathway	1/61	75/17653	0.229070363	0.456772339	0.430868073	8085	1
BP	GO:0090049	regulation of cell migration involved in sprouting angiogenesis	1/61	75/17653	0.229070363	0.456772339	0.430868073	161742	1
BP	GO:1903671	negative regulation of sprouting angiogenesis	1/61	75/17653	0.229070363	0.456772339	0.430868073	161742	1
BP	GO:0032943	mononuclear cell proliferation	2/61	262/17653	0.229134928	0.456772339	0.430868073	1026/3572	2
BP	GO:0005977	glycogen metabolic process	1/61	76/17653	0.231745679	0.456772339	0.430868073	3572	1
BP	GO:0017158	regulation of calcium ion-dependent exocytosis	1/61	76/17653	0.231745679	0.456772339	0.430868073	192683	1
BP	GO:0045652	regulation of megakaryocyte differentiation	1/61	76/17653	0.231745679	0.456772339	0.430868073	8085	1
BP	GO:0006914	autophagy	3/61	482/17653	0.232303241	0.456772339	0.430868073	143686/9559/55432	3
BP	GO:0061919	process utilizing autophagic mechanism	3/61	482/17653	0.232303241	0.456772339	0.430868073	143686/9559/55432	3
BP	GO:0002521	leukocyte differentiation	3/61	483/17653	0.233220427	0.456772339	0.430868073	1236/28962/169200	3
BP	GO:0006073	cellular glucan metabolic process	1/61	77/17653	0.234411863	0.456772339	0.430868073	3572	1
BP	GO:0006303	double-strand break repair via nonhomologous end joining	1/61	77/17653	0.234411863	0.456772339	0.430868073	10721	1
BP	GO:0031100	animal organ regeneration	1/61	77/17653	0.234411863	0.456772339	0.430868073	1026	1
BP	GO:0031295	T cell costimulation	1/61	77/17653	0.234411863	0.456772339	0.430868073	1236	1
BP	GO:0042509	regulation of tyrosine phosphorylation of STAT protein	1/61	77/17653	0.234411863	0.456772339	0.430868073	3572	1
BP	GO:0043537	negative regulation of blood vessel endothelial cell migration	1/61	77/17653	0.234411863	0.456772339	0.430868073	161742	1
BP	GO:0044042	glucan metabolic process	1/61	77/17653	0.234411863	0.456772339	0.430868073	3572	1
BP	GO:0044839	cell cycle G2/M phase transition	2/61	267/17653	0.235519575	0.456772339	0.430868073	993/1026	2
BP	GO:0051403	stress-activated MAPK cascade	2/61	267/17653	0.235519575	0.456772339	0.430868073	1236/8322	2
BP	GO:0010827	regulation of glucose transmembrane transport	1/61	78/17653	0.237068945	0.456772339	0.430868073	1389	1
BP	GO:0031294	lymphocyte costimulation	1/61	78/17653	0.237068945	0.456772339	0.430868073	1236	1
BP	GO:0048259	regulation of receptor-mediated endocytosis	1/61	78/17653	0.237068945	0.456772339	0.430868073	3092	1
BP	GO:0072401	signal transduction involved in DNA integrity checkpoint	1/61	78/17653	0.237068945	0.456772339	0.430868073	1026	1
BP	GO:0072422	signal transduction involved in DNA damage checkpoint	1/61	78/17653	0.237068945	0.456772339	0.430868073	1026	1
BP	GO:0140029	exocytic process	1/61	78/17653	0.237068945	0.456772339	0.430868073	6809	1
BP	GO:1905897	regulation of response to endoplasmic reticulum stress	1/61	78/17653	0.237068945	0.456772339	0.430868073	55432	1
BP	GO:0016054	organic acid catabolic process	2/61	269/17653	0.23807672	0.456772339	0.430868073	11057/586	2
BP	GO:0046395	carboxylic acid catabolic process	2/61	269/17653	0.23807672	0.456772339	0.430868073	11057/586	2
BP	GO:0060627	regulation of vesicle-mediated transport	3/61	490/17653	0.239659986	0.456772339	0.430868073	3092/192683/6653	3
BP	GO:0046323	glucose import	1/61	79/17653	0.239716956	0.456772339	0.430868073	1389	1
BP	GO:0061418	regulation of transcription from RNA polymerase II promoter in response to hypoxia	1/61	79/17653	0.239716956	0.456772339	0.430868073	112399	1
BP	GO:0072395	signal transduction involved in cell cycle checkpoint	1/61	79/17653	0.239716956	0.456772339	0.430868073	1026	1
BP	GO:1901879	regulation of protein depolymerization	1/61	79/17653	0.239716956	0.456772339	0.430868073	1073	1
BP	GO:2001022	positive regulation of response to DNA damage stimulus	1/61	79/17653	0.239716956	0.456772339	0.430868073	161742	1
BP	GO:0072331	signal transduction by p53 class mediator	2/61	272/17653	0.241915507	0.459088319	0.43305271	1026/161742	2
BP	GO:0007260	tyrosine phosphorylation of STAT protein	1/61	80/17653	0.242355926	0.459088319	0.43305271	3572	1
BP	GO:0046427	positive regulation of JAK-STAT cascade	1/61	80/17653	0.242355926	0.459088319	0.43305271	3572	1
BP	GO:0048477	oogenesis	1/61	80/17653	0.242355926	0.459088319	0.43305271	8085	1
BP	GO:0002821	positive regulation of adaptive immune response	1/61	81/17653	0.244985887	0.460687746	0.434561431	3572	1
BP	GO:0008652	cellular amino acid biosynthetic process	1/61	81/17653	0.244985887	0.460687746	0.434561431	586	1
BP	GO:0045921	positive regulation of exocytosis	1/61	81/17653	0.244985887	0.460687746	0.434561431	192683	1
BP	GO:0070542	response to fatty acid	1/61	81/17653	0.244985887	0.460687746	0.434561431	1236	1
BP	GO:0097581	lamellipodium organization	1/61	81/17653	0.244985887	0.460687746	0.434561431	55704	1
BP	GO:0014909	smooth muscle cell migration	1/61	82/17653	0.247606867	0.460913215	0.434774114	6653	1
BP	GO:0032612	interleukin-1 production	1/61	82/17653	0.247606867	0.460913215	0.434774114	1236	1
BP	GO:0042147	retrograde transport, endosome to Golgi	1/61	82/17653	0.247606867	0.460913215	0.434774114	9559	1
BP	GO:0046849	bone remodeling	1/61	82/17653	0.247606867	0.460913215	0.434774114	169200	1
BP	GO:0070098	chemokine-mediated signaling pathway	1/61	82/17653	0.247606867	0.460913215	0.434774114	1236	1
BP	GO:0072332	intrinsic apoptotic signaling pathway by p53 class mediator	1/61	82/17653	0.247606867	0.460913215	0.434774114	1026	1
BP	GO:1904894	positive regulation of STAT cascade	1/61	82/17653	0.247606867	0.460913215	0.434774114	3572	1
BP	GO:0070661	leukocyte proliferation	2/61	278/17653	0.249602397	0.463767783	0.437466794	1026/3572	2
BP	GO:0050886	endocrine process	1/61	83/17653	0.250218897	0.463767783	0.437466794	8322	1
BP	GO:0072527	pyrimidine-containing compound metabolic process	1/61	83/17653	0.250218897	0.463767783	0.437466794	51727	1
BP	GO:0000726	non-recombinational repair	1/61	84/17653	0.252822007	0.466581386	0.440120834	10721	1
BP	GO:0097194	execution phase of apoptosis	1/61	84/17653	0.252822007	0.466581386	0.440120834	130399	1
BP	GO:2000106	regulation of leukocyte apoptotic process	1/61	84/17653	0.252822007	0.466581386	0.440120834	1236	1
BP	GO:1901214	regulation of neuron death	2/61	281/17653	0.253449571	0.467071353	0.440583014	112399/6653	2
BP	GO:0034103	regulation of tissue remodeling	1/61	85/17653	0.255416227	0.468021212	0.441479005	169200	1
BP	GO:0043506	regulation of JUN kinase activity	1/61	85/17653	0.255416227	0.468021212	0.441479005	8322	1
BP	GO:0045778	positive regulation of ossification	1/61	85/17653	0.255416227	0.468021212	0.441479005	3572	1
BP	GO:0061053	somite development	1/61	85/17653	0.255416227	0.468021212	0.441479005	85407	1
BP	GO:0002042	cell migration involved in sprouting angiogenesis	1/61	86/17653	0.258001588	0.470087638	0.443428242	161742	1
BP	GO:0034446	substrate adhesion-dependent cell spreading	1/61	86/17653	0.258001588	0.470087638	0.443428242	8322	1
BP	GO:0042058	regulation of epidermal growth factor receptor signaling pathway	1/61	86/17653	0.258001588	0.470087638	0.443428242	3092	1
BP	GO:1903076	regulation of protein localization to plasma membrane	1/61	86/17653	0.258001588	0.470087638	0.443428242	6809	1
BP	GO:0001843	neural tube closure	1/61	87/17653	0.260578118	0.471452695	0.444715884	5567	1
BP	GO:0002690	positive regulation of leukocyte chemotaxis	1/61	87/17653	0.260578118	0.471452695	0.444715884	1236	1
BP	GO:0045639	positive regulation of myeloid cell differentiation	1/61	87/17653	0.260578118	0.471452695	0.444715884	169200	1
BP	GO:0048145	regulation of fibroblast proliferation	1/61	87/17653	0.260578118	0.471452695	0.444715884	1026	1
BP	GO:1901989	positive regulation of cell cycle phase transition	1/61	87/17653	0.260578118	0.471452695	0.444715884	993	1
BP	GO:0016079	synaptic vesicle exocytosis	1/61	88/17653	0.263145847	0.472125372	0.445350412	6809	1
BP	GO:0030593	neutrophil chemotaxis	1/61	88/17653	0.263145847	0.472125372	0.445350412	1236	1
BP	GO:0045069	regulation of viral genome replication	1/61	88/17653	0.263145847	0.472125372	0.445350412	6895	1
BP	GO:0048144	fibroblast proliferation	1/61	88/17653	0.263145847	0.472125372	0.445350412	1026	1
BP	GO:0060606	tube closure	1/61	88/17653	0.263145847	0.472125372	0.445350412	5567	1
BP	GO:0071158	positive regulation of cell cycle arrest	1/61	88/17653	0.263145847	0.472125372	0.445350412	1026	1
BP	GO:0048709	oligodendrocyte differentiation	1/61	89/17653	0.265704805	0.476054443	0.449056659	23500	1
BP	GO:0016579	protein deubiquitination	2/61	291/17653	0.266284616	0.47643156	0.44941239	993/55432	2
BP	GO:0006112	energy reserve metabolic process	1/61	90/17653	0.268255022	0.477968202	0.450861887	3572	1
BP	GO:0006911	phagocytosis, engulfment	1/61	90/17653	0.268255022	0.477968202	0.450861887	94134	1
BP	GO:0097006	regulation of plasma lipoprotein particle levels	1/61	90/17653	0.268255022	0.477968202	0.450861887	5567	1
BP	GO:0043414	macromolecule methylation	2/61	294/17653	0.270136807	0.480505529	0.453255317	154743/8085	2
BP	GO:0032649	regulation of interferon-gamma production	1/61	91/17653	0.270796527	0.480505529	0.453255317	1236	1
BP	GO:0090630	activation of GTPase activity	1/61	91/17653	0.270796527	0.480505529	0.453255317	1236	1
BP	GO:0031098	stress-activated protein kinase signaling cascade	2/61	296/17653	0.272704975	0.482564359	0.455197388	1236/8322	2
BP	GO:0072330	monocarboxylic acid biosynthetic process	2/61	296/17653	0.272704975	0.482564359	0.455197388	11057/11343	2
BP	GO:2000379	positive regulation of reactive oxygen species metabolic process	1/61	92/17653	0.273329348	0.483006656	0.455614602	1026	1
BP	GO:0014812	muscle cell migration	1/61	93/17653	0.275853516	0.483956989	0.45651104	6653	1
BP	GO:0030219	megakaryocyte differentiation	1/61	93/17653	0.275853516	0.483956989	0.45651104	8085	1
BP	GO:0042100	B cell proliferation	1/61	93/17653	0.275853516	0.483956989	0.45651104	1026	1
BP	GO:0009953	dorsal/ventral pattern formation	1/61	94/17653	0.278369059	0.483956989	0.45651104	5567	1
BP	GO:0010596	negative regulation of endothelial cell migration	1/61	94/17653	0.278369059	0.483956989	0.45651104	161742	1
BP	GO:0014020	primary neural tube formation	1/61	94/17653	0.278369059	0.483956989	0.45651104	5567	1
BP	GO:0021549	cerebellum development	1/61	94/17653	0.278369059	0.483956989	0.45651104	8322	1
BP	GO:0035282	segmentation	1/61	94/17653	0.278369059	0.483956989	0.45651104	85407	1
BP	GO:0036503	ERAD pathway	1/61	94/17653	0.278369059	0.483956989	0.45651104	55432	1
BP	GO:0072676	lymphocyte migration	1/61	94/17653	0.278369059	0.483956989	0.45651104	1236	1
BP	GO:1902882	regulation of response to oxidative stress	1/61	94/17653	0.278369059	0.483956989	0.45651104	143686	1
BP	GO:1904375	regulation of protein localization to cell periphery	1/61	94/17653	0.278369059	0.483956989	0.45651104	6809	1
BP	GO:0010721	negative regulation of cell development	2/61	301/17653	0.279124668	0.484617526	0.457134117	23500/6653	2
BP	GO:1903037	regulation of leukocyte cell-cell adhesion	2/61	302/17653	0.280408364	0.485046918	0.457539158	1236/3572	2
BP	GO:0006892	post-Golgi vesicle-mediated transport	1/61	95/17653	0.280876006	0.485046918	0.457539158	6653	1
BP	GO:0019233	sensory perception of pain	1/61	95/17653	0.280876006	0.485046918	0.457539158	11343	1
BP	GO:0043502	regulation of muscle adaptation	1/61	95/17653	0.280876006	0.485046918	0.457539158	3572	1
BP	GO:0006470	protein dephosphorylation	2/61	303/17653	0.281691945	0.485805627	0.458254839	993/8036	2
BP	GO:0008585	female gonad development	1/61	96/17653	0.283374387	0.486754938	0.459150313	8322	1
BP	GO:0008593	regulation of Notch signaling pathway	1/61	96/17653	0.283374387	0.486754938	0.459150313	3572	1
BP	GO:0042102	positive regulation of T cell proliferation	1/61	96/17653	0.283374387	0.486754938	0.459150313	3572	1
BP	GO:0009416	response to light stimulus	2/61	305/17653	0.284258706	0.487063828	0.459441685	993/1026	2
BP	GO:0046879	hormone secretion	2/61	306/17653	0.285541857	0.487063828	0.459441685	130399/8322	2
BP	GO:0070646	protein modification by small protein removal	2/61	306/17653	0.285541857	0.487063828	0.459441685	993/55432	2
BP	GO:0007229	integrin-mediated signaling pathway	1/61	97/17653	0.285864229	0.487063828	0.459441685	4739	1
BP	GO:0048010	vascular endothelial growth factor receptor signaling pathway	1/61	97/17653	0.285864229	0.487063828	0.459441685	8322	1
BP	GO:0048640	negative regulation of developmental growth	1/61	97/17653	0.285864229	0.487063828	0.459441685	85407	1
BP	GO:0003300	cardiac muscle hypertrophy	1/61	98/17653	0.288345562	0.487063828	0.459441685	3572	1
BP	GO:0006476	protein deacetylation	1/61	98/17653	0.288345562	0.487063828	0.459441685	161742	1
BP	GO:0006641	triglyceride metabolic process	1/61	98/17653	0.288345562	0.487063828	0.459441685	11343	1
BP	GO:0032091	negative regulation of protein binding	1/61	98/17653	0.288345562	0.487063828	0.459441685	6653	1
BP	GO:0010506	regulation of autophagy	2/61	310/17653	0.290672608	0.487063828	0.459441685	143686/9559	2
BP	GO:0071214	cellular response to abiotic stimulus	2/61	310/17653	0.290672608	0.487063828	0.459441685	993/1026	2
BP	GO:0104004	cellular response to environmental stimulus	2/61	310/17653	0.290672608	0.487063828	0.459441685	993/1026	2
BP	GO:0035335	peptidyl-tyrosine dephosphorylation	1/61	99/17653	0.290818414	0.487063828	0.459441685	993	1
BP	GO:0043331	response to dsRNA	1/61	99/17653	0.290818414	0.487063828	0.459441685	6895	1
BP	GO:0044264	cellular polysaccharide metabolic process	1/61	99/17653	0.290818414	0.487063828	0.459441685	3572	1
BP	GO:0099024	plasma membrane invagination	1/61	99/17653	0.290818414	0.487063828	0.459441685	94134	1
BP	GO:1901184	regulation of ERBB signaling pathway	1/61	99/17653	0.290818414	0.487063828	0.459441685	3092	1
BP	GO:1990266	neutrophil migration	1/61	99/17653	0.290818414	0.487063828	0.459441685	1236	1
BP	GO:0070372	regulation of ERK1 and ERK2 cascade	2/61	311/17653	0.291954764	0.487063828	0.459441685	1236/161742	2
BP	GO:0006282	regulation of DNA repair	1/61	100/17653	0.293282814	0.487063828	0.459441685	10721	1
BP	GO:0014897	striated muscle hypertrophy	1/61	100/17653	0.293282814	0.487063828	0.459441685	3572	1
BP	GO:0021510	spinal cord development	1/61	100/17653	0.293282814	0.487063828	0.459441685	23500	1
BP	GO:0030838	positive regulation of actin filament polymerization	1/61	100/17653	0.293282814	0.487063828	0.459441685	1236	1
BP	GO:0033138	positive regulation of peptidyl-serine phosphorylation	1/61	100/17653	0.293282814	0.487063828	0.459441685	1389	1
BP	GO:0010923	negative regulation of phosphatase activity	1/61	101/17653	0.29573879	0.487063828	0.459441685	161742	1
BP	GO:0031532	actin cytoskeleton reorganization	1/61	101/17653	0.29573879	0.487063828	0.459441685	4739	1
BP	GO:0046545	development of primary female sexual characteristics	1/61	101/17653	0.29573879	0.487063828	0.459441685	8322	1
BP	GO:0046822	regulation of nucleocytoplasmic transport	1/61	101/17653	0.29573879	0.487063828	0.459441685	1026	1
BP	GO:2000278	regulation of DNA biosynthetic process	1/61	101/17653	0.29573879	0.487063828	0.459441685	1026	1
BP	GO:0001676	long-chain fatty acid metabolic process	1/61	102/17653	0.298186371	0.487063828	0.459441685	11343	1
BP	GO:0001841	neural tube formation	1/61	102/17653	0.298186371	0.487063828	0.459441685	5567	1
BP	GO:0014896	muscle hypertrophy	1/61	102/17653	0.298186371	0.487063828	0.459441685	3572	1
BP	GO:0032609	interferon-gamma production	1/61	102/17653	0.298186371	0.487063828	0.459441685	1236	1
BP	GO:0071887	leukocyte apoptotic process	1/61	102/17653	0.298186371	0.487063828	0.459441685	1236	1
BP	GO:1900180	regulation of protein localization to nucleus	1/61	102/17653	0.298186371	0.487063828	0.459441685	1026	1
BP	GO:1903828	negative regulation of cellular protein localization	1/61	102/17653	0.298186371	0.487063828	0.459441685	55432	1
BP	GO:0070997	neuron death	2/61	316/17653	0.298361671	0.487063828	0.459441685	112399/6653	2
BP	GO:0008630	intrinsic apoptotic signaling pathway in response to DNA damage	1/61	103/17653	0.300625584	0.487063828	0.459441685	1026	1
BP	GO:0009119	ribonucleoside metabolic process	1/61	103/17653	0.300625584	0.487063828	0.459441685	51727	1
BP	GO:0022037	metencephalon development	1/61	103/17653	0.300625584	0.487063828	0.459441685	8322	1
BP	GO:0033559	unsaturated fatty acid metabolic process	1/61	103/17653	0.300625584	0.487063828	0.459441685	11343	1
BP	GO:0048524	positive regulation of viral process	1/61	103/17653	0.300625584	0.487063828	0.459441685	6895	1
BP	GO:0051261	protein depolymerization	1/61	103/17653	0.300625584	0.487063828	0.459441685	1073	1
BP	GO:2001237	negative regulation of extrinsic apoptotic signaling pathway	1/61	103/17653	0.300625584	0.487063828	0.459441685	55023	1
BP	GO:0009914	hormone transport	2/61	318/17653	0.30092238	0.487063828	0.459441685	130399/8322	2
BP	GO:0031589	cell-substrate adhesion	2/61	319/17653	0.302202243	0.487536078	0.459887153	1236/8322	2
BP	GO:0032526	response to retinoic acid	1/61	104/17653	0.303056458	0.487536078	0.459887153	8322	1
BP	GO:0034968	histone lysine methylation	1/61	104/17653	0.303056458	0.487536078	0.459887153	8085	1
BP	GO:1901800	positive regulation of proteasomal protein catabolic process	1/61	104/17653	0.303056458	0.487536078	0.459887153	160418	1
BP	GO:0016042	lipid catabolic process	2/61	320/17653	0.30348176	0.487536078	0.459887153	11057/11343	2
BP	GO:0051260	protein homooligomerization	2/61	320/17653	0.30348176	0.487536078	0.459887153	10721/23023	2
BP	GO:0050863	regulation of T cell activation	2/61	321/17653	0.304760919	0.487707843	0.460049177	1236/3572	2
BP	GO:0002698	negative regulation of immune effector process	1/61	105/17653	0.305479021	0.487707843	0.460049177	6895	1
BP	GO:0010508	positive regulation of autophagy	1/61	105/17653	0.305479021	0.487707843	0.460049177	143686	1
BP	GO:0043244	regulation of protein complex disassembly	1/61	105/17653	0.305479021	0.487707843	0.460049177	1073	1
BP	GO:0071621	granulocyte chemotaxis	1/61	105/17653	0.305479021	0.487707843	0.460049177	1236	1
BP	GO:0001952	regulation of cell-matrix adhesion	1/61	106/17653	0.307893301	0.490954707	0.463111906	1236	1
BP	GO:0010631	epithelial cell migration	2/61	324/17653	0.308596123	0.491148625	0.463294827	2196/161742	2
BP	GO:0051480	regulation of cytosolic calcium ion concentration	2/61	325/17653	0.309873725	0.491148625	0.463294827	1236/169200	2
BP	GO:0010324	membrane invagination	1/61	107/17653	0.310299325	0.491148625	0.463294827	94134	1
BP	GO:0010811	positive regulation of cell-substrate adhesion	1/61	107/17653	0.310299325	0.491148625	0.463294827	1236	1
BP	GO:0035305	negative regulation of dephosphorylation	1/61	107/17653	0.310299325	0.491148625	0.463294827	161742	1
BP	GO:0044773	mitotic DNA damage checkpoint	1/61	107/17653	0.310299325	0.491148625	0.463294827	1026	1
BP	GO:0090132	epithelium migration	2/61	327/17653	0.312427655	0.493128713	0.465162621	2196/161742	2
BP	GO:0035601	protein deacylation	1/61	108/17653	0.312697122	0.493128713	0.465162621	161742	1
BP	GO:1904659	glucose transmembrane transport	1/61	108/17653	0.312697122	0.493128713	0.465162621	1389	1
BP	GO:0032147	activation of protein kinase activity	2/61	328/17653	0.31370396	0.493278965	0.465304352	55704/5567	2
BP	GO:0070371	ERK1 and ERK2 cascade	2/61	328/17653	0.31370396	0.493278965	0.465304352	1236/161742	2
BP	GO:0010927	cellular component assembly involved in morphogenesis	1/61	109/17653	0.315086718	0.493278965	0.465304352	1073	1
BP	GO:0043200	response to amino acid	1/61	109/17653	0.315086718	0.493278965	0.465304352	143686	1
BP	GO:0043666	regulation of phosphoprotein phosphatase activity	1/61	109/17653	0.315086718	0.493278965	0.465304352	8036	1
BP	GO:0098732	macromolecule deacylation	1/61	109/17653	0.315086718	0.493278965	0.465304352	161742	1
BP	GO:0006690	icosanoid metabolic process	1/61	110/17653	0.317468143	0.494317729	0.466284207	11343	1
BP	GO:0009062	fatty acid catabolic process	1/61	110/17653	0.317468143	0.494317729	0.466284207	11057	1
BP	GO:0002688	regulation of leukocyte chemotaxis	1/61	111/17653	0.319841422	0.494317729	0.466284207	1236	1
BP	GO:0005976	polysaccharide metabolic process	1/61	111/17653	0.319841422	0.494317729	0.466284207	3572	1
BP	GO:0007569	cell aging	1/61	111/17653	0.319841422	0.494317729	0.466284207	1026	1
BP	GO:0010633	negative regulation of epithelial cell migration	1/61	111/17653	0.319841422	0.494317729	0.466284207	161742	1
BP	GO:0043500	muscle adaptation	1/61	111/17653	0.319841422	0.494317729	0.466284207	3572	1
BP	GO:0003002	regionalization	2/61	333/17653	0.320078394	0.494317729	0.466284207	85407/5567	2
BP	GO:0090130	tissue migration	2/61	333/17653	0.320078394	0.494317729	0.466284207	2196/161742	2
BP	GO:0000724	double-strand break repair via homologous recombination	1/61	112/17653	0.322206585	0.494317729	0.466284207	10721	1
BP	GO:0002065	columnar/cuboidal epithelial cell differentiation	1/61	112/17653	0.322206585	0.494317729	0.466284207	1026	1
BP	GO:0051209	release of sequestered calcium ion into cytosol	1/61	112/17653	0.322206585	0.494317729	0.466284207	1236	1
BP	GO:0051283	negative regulation of sequestering of calcium ion	1/61	112/17653	0.322206585	0.494317729	0.466284207	1236	1
BP	GO:0007159	leukocyte cell-cell adhesion	2/61	335/17653	0.322624641	0.494317729	0.466284207	1236/3572	2
BP	GO:0031331	positive regulation of cellular catabolic process	2/61	335/17653	0.322624641	0.494317729	0.466284207	143686/160418	2
BP	GO:0048871	multicellular organismal homeostasis	2/61	335/17653	0.322624641	0.494317729	0.466284207	5567/169200	2
BP	GO:1902903	regulation of supramolecular fiber organization	2/61	336/17653	0.323896962	0.494317729	0.466284207	1236/1073	2
BP	GO:0000725	recombinational repair	1/61	113/17653	0.324563656	0.494317729	0.466284207	10721	1
BP	GO:0003014	renal system process	1/61	113/17653	0.324563656	0.494317729	0.466284207	5567	1
BP	GO:0042177	negative regulation of protein catabolic process	1/61	113/17653	0.324563656	0.494317729	0.466284207	55432	1
BP	GO:0044774	mitotic DNA integrity checkpoint	1/61	113/17653	0.324563656	0.494317729	0.466284207	1026	1
BP	GO:0051282	regulation of sequestering of calcium ion	1/61	113/17653	0.324563656	0.494317729	0.466284207	1236	1
BP	GO:0071156	regulation of cell cycle arrest	1/61	113/17653	0.324563656	0.494317729	0.466284207	1026	1
BP	GO:0002761	regulation of myeloid leukocyte differentiation	1/61	114/17653	0.326912665	0.496722424	0.468552528	169200	1
BP	GO:0008645	hexose transmembrane transport	1/61	114/17653	0.326912665	0.496722424	0.468552528	1389	1
BP	GO:0019079	viral genome replication	1/61	115/17653	0.329253639	0.499690816	0.471352577	6895	1
BP	GO:0015749	monosaccharide transmembrane transport	1/61	116/17653	0.331586603	0.500288559	0.471916421	1389	1
BP	GO:0046660	female sex differentiation	1/61	116/17653	0.331586603	0.500288559	0.471916421	8322	1
BP	GO:0050715	positive regulation of cytokine secretion	1/61	116/17653	0.331586603	0.500288559	0.471916421	192683	1
BP	GO:0051208	sequestering of calcium ion	1/61	116/17653	0.331586603	0.500288559	0.471916421	1236	1
BP	GO:2000134	negative regulation of G1/S transition of mitotic cell cycle	1/61	116/17653	0.331586603	0.500288559	0.471916421	1026	1
BP	GO:0006869	lipid transport	2/61	343/17653	0.332787192	0.501513408	0.473071807	8322/6653	2
BP	GO:0006165	nucleoside diphosphate phosphorylation	1/61	117/17653	0.333911585	0.501665537	0.473215308	51727	1
BP	GO:1905477	positive regulation of protein localization to membrane	1/61	117/17653	0.333911585	0.501665537	0.473215308	6809	1
BP	GO:0001654	eye development	2/61	344/17653	0.334054803	0.501665537	0.473215308	8322/85407	2
BP	GO:0007368	determination of left/right symmetry	1/61	118/17653	0.336228613	0.502547351	0.474047114	23500	1
BP	GO:0009063	cellular amino acid catabolic process	1/61	118/17653	0.336228613	0.502547351	0.474047114	586	1
BP	GO:0018022	peptidyl-lysine methylation	1/61	118/17653	0.336228613	0.502547351	0.474047114	8085	1
BP	GO:0006913	nucleocytoplasmic transport	2/61	347/17653	0.337853769	0.502547351	0.474047114	1026/55916	2
BP	GO:0018107	peptidyl-threonine phosphorylation	1/61	119/17653	0.338537712	0.502547351	0.474047114	161742	1
BP	GO:0034219	carbohydrate transmembrane transport	1/61	119/17653	0.338537712	0.502547351	0.474047114	1389	1
BP	GO:0043618	regulation of transcription from RNA polymerase II promoter in response to stress	1/61	119/17653	0.338537712	0.502547351	0.474047114	112399	1
BP	GO:0050871	positive regulation of B cell activation	1/61	119/17653	0.338537712	0.502547351	0.474047114	1026	1
BP	GO:0097530	granulocyte migration	1/61	119/17653	0.338537712	0.502547351	0.474047114	1236	1
BP	GO:1903052	positive regulation of proteolysis involved in cellular protein catabolic process	1/61	119/17653	0.338537712	0.502547351	0.474047114	160418	1
BP	GO:0045727	positive regulation of translation	1/61	120/17653	0.34083891	0.503645124	0.47508263	6895	1
BP	GO:0048489	synaptic vesicle transport	1/61	120/17653	0.34083891	0.503645124	0.47508263	6809	1
BP	GO:0050709	negative regulation of protein secretion	1/61	120/17653	0.34083891	0.503645124	0.47508263	130399	1
BP	GO:0097480	establishment of synaptic vesicle localization	1/61	120/17653	0.34083891	0.503645124	0.47508263	6809	1
BP	GO:0051169	nuclear transport	2/61	351/17653	0.342909638	0.505874948	0.477185998	1026/55916	2
BP	GO:0006275	regulation of DNA replication	1/61	121/17653	0.343132232	0.505874948	0.477185998	55704	1
BP	GO:0045861	negative regulation of proteolysis	2/61	352/17653	0.344171854	0.506828415	0.478085392	6653/55432	2
BP	GO:0001838	embryonic epithelial tube formation	1/61	122/17653	0.345417706	0.507187389	0.478424008	5567	1
BP	GO:1903305	regulation of regulated secretory pathway	1/61	122/17653	0.345417706	0.507187389	0.478424008	192683	1
BP	GO:0002223	stimulatory C-type lectin receptor signaling pathway	1/61	123/17653	0.347695359	0.507187389	0.478424008	5567	1
BP	GO:0002687	positive regulation of leukocyte migration	1/61	123/17653	0.347695359	0.507187389	0.478424008	1236	1
BP	GO:0006342	chromatin silencing	1/61	123/17653	0.347695359	0.507187389	0.478424008	8085	1
BP	GO:0030010	establishment of cell polarity	1/61	123/17653	0.347695359	0.507187389	0.478424008	1236	1
BP	GO:0046939	nucleotide phosphorylation	1/61	123/17653	0.347695359	0.507187389	0.478424008	51727	1
BP	GO:1902807	negative regulation of cell cycle G1/S phase transition	1/61	123/17653	0.347695359	0.507187389	0.478424008	1026	1
BP	GO:0032259	methylation	2/61	355/17653	0.347954139	0.507187389	0.478424008	154743/8085	2
BP	GO:0051291	protein heterooligomerization	1/61	124/17653	0.349965215	0.509543033	0.48064606	23023	1
BP	GO:0032535	regulation of cellular component size	2/61	358/17653	0.351729671	0.510531707	0.481578665	1236/1073	2
BP	GO:0002920	regulation of humoral immune response	1/61	125/17653	0.352227302	0.510531707	0.481578665	1236	1
BP	GO:0009116	nucleoside metabolic process	1/61	125/17653	0.352227302	0.510531707	0.481578665	51727	1
BP	GO:0043620	regulation of DNA-templated transcription in response to stress	1/61	125/17653	0.352227302	0.510531707	0.481578665	112399	1
BP	GO:0002220	innate immune response activating cell surface receptor signaling pathway	1/61	126/17653	0.354481646	0.512449299	0.483387507	5567	1
BP	GO:0002792	negative regulation of peptide secretion	1/61	126/17653	0.354481646	0.512449299	0.483387507	130399	1
BP	GO:0002831	regulation of response to biotic stimulus	1/61	127/17653	0.356728272	0.512449299	0.483387507	6895	1
BP	GO:0007224	smoothened signaling pathway	1/61	127/17653	0.356728272	0.512449299	0.483387507	5567	1
BP	GO:0007292	female gamete generation	1/61	127/17653	0.356728272	0.512449299	0.483387507	8085	1
BP	GO:0009855	determination of bilateral symmetry	1/61	127/17653	0.356728272	0.512449299	0.483387507	23500	1
BP	GO:0035304	regulation of protein dephosphorylation	1/61	127/17653	0.356728272	0.512449299	0.483387507	8036	1
BP	GO:0097479	synaptic vesicle localization	1/61	127/17653	0.356728272	0.512449299	0.483387507	6809	1
BP	GO:0009799	specification of symmetry	1/61	128/17653	0.358967207	0.514519663	0.485340458	23500	1
BP	GO:0097553	calcium ion transmembrane import into cytosol	1/61	128/17653	0.358967207	0.514519663	0.485340458	1236	1
BP	GO:1903670	regulation of sprouting angiogenesis	1/61	129/17653	0.361198477	0.516803946	0.487495195	161742	1
BP	GO:0019216	regulation of lipid metabolic process	2/61	366/17653	0.361762762	0.516803946	0.487495195	1236/1389	2
BP	GO:0042692	muscle cell differentiation	2/61	366/17653	0.361762762	0.516803946	0.487495195	1073/23345	2
BP	GO:0006520	cellular amino acid metabolic process	2/61	367/17653	0.363013151	0.516884804	0.487571468	586/112399	2
BP	GO:0030968	endoplasmic reticulum unfolded protein response	1/61	130/17653	0.363422107	0.516884804	0.487571468	55432	1
BP	GO:0032273	positive regulation of protein polymerization	1/61	130/17653	0.363422107	0.516884804	0.487571468	1236	1
BP	GO:0072175	epithelial tube formation	1/61	130/17653	0.363422107	0.516884804	0.487571468	5567	1
BP	GO:0002819	regulation of adaptive immune response	1/61	131/17653	0.365638123	0.518261709	0.488870286	3572	1
BP	GO:0045807	positive regulation of endocytosis	1/61	131/17653	0.365638123	0.518261709	0.488870286	3092	1
BP	GO:0007173	epidermal growth factor receptor signaling pathway	1/61	132/17653	0.367846551	0.518261709	0.488870286	3092	1
BP	GO:0016571	histone methylation	1/61	132/17653	0.367846551	0.518261709	0.488870286	8085	1
BP	GO:0031333	negative regulation of protein complex assembly	1/61	132/17653	0.367846551	0.518261709	0.488870286	6653	1
BP	GO:0033135	regulation of peptidyl-serine phosphorylation	1/61	132/17653	0.367846551	0.518261709	0.488870286	1389	1
BP	GO:0034605	cellular response to heat	1/61	132/17653	0.367846551	0.518261709	0.488870286	1026	1
BP	GO:0072329	monocarboxylic acid catabolic process	1/61	132/17653	0.367846551	0.518261709	0.488870286	11057	1
BP	GO:0001503	ossification	2/61	371/17653	0.368005989	0.518261709	0.488870286	3572/169200	2
BP	GO:0006631	fatty acid metabolic process	2/61	372/17653	0.369251974	0.518870833	0.489444866	11057/11343	2
BP	GO:0048565	digestive tract development	1/61	133/17653	0.370047416	0.518870833	0.489444866	1026	1
BP	GO:0099504	synaptic vesicle cycle	1/61	133/17653	0.370047416	0.518870833	0.489444866	6809	1
BP	GO:1902107	positive regulation of leukocyte differentiation	1/61	133/17653	0.370047416	0.518870833	0.489444866	169200	1
BP	GO:0051053	negative regulation of DNA metabolic process	1/61	134/17653	0.372240744	0.521379544	0.491811304	10721	1
BP	GO:0008203	cholesterol metabolic process	1/61	135/17653	0.37442656	0.523872302	0.494162694	6653	1
BP	GO:0070482	response to oxygen levels	2/61	378/17653	0.376708542	0.526494061	0.496635769	1026/112399	2
BP	GO:0090263	positive regulation of canonical Wnt signaling pathway	1/61	137/17653	0.378775758	0.528238625	0.498281396	23500	1
BP	GO:1903900	regulation of viral life cycle	1/61	137/17653	0.378775758	0.528238625	0.498281396	6895	1
BP	GO:0030518	intracellular steroid hormone receptor signaling pathway	1/61	138/17653	0.380939191	0.528968306	0.498969695	8085	1
BP	GO:0045814	negative regulation of gene expression, epigenetic	1/61	138/17653	0.380939191	0.528968306	0.498969695	8085	1
BP	GO:0060041	retina development in camera-type eye	1/61	138/17653	0.380939191	0.528968306	0.498969695	8322	1
BP	GO:1903364	positive regulation of cellular protein catabolic process	1/61	138/17653	0.380939191	0.528968306	0.498969695	160418	1
BP	GO:0007030	Golgi organization	1/61	139/17653	0.383095212	0.53024981	0.500178524	23345	1
BP	GO:0018210	peptidyl-threonine modification	1/61	139/17653	0.383095212	0.53024981	0.500178524	161742	1
BP	GO:0099003	vesicle-mediated transport in synapse	1/61	139/17653	0.383095212	0.53024981	0.500178524	6809	1
BP	GO:0034250	positive regulation of cellular amide metabolic process	1/61	140/17653	0.385243847	0.532652264	0.50244473	6895	1
BP	GO:0008277	regulation of G-protein coupled receptor protein signaling pathway	1/61	141/17653	0.38738512	0.534467171	0.504156712	11343	1
BP	GO:1902652	secondary alcohol metabolic process	1/61	141/17653	0.38738512	0.534467171	0.504156712	6653	1
BP	GO:0022407	regulation of cell-cell adhesion	2/61	388/17653	0.389058715	0.536202716	0.505793831	1236/3572	2
BP	GO:0051604	protein maturation	2/61	390/17653	0.391516562	0.5364301	0.506008319	5567/6653	2
BP	GO:0009132	nucleoside diphosphate metabolic process	1/61	143/17653	0.391645683	0.5364301	0.506008319	51727	1
BP	GO:0035264	multicellular organism growth	1/61	143/17653	0.391645683	0.5364301	0.506008319	6895	1
BP	GO:0051384	response to glucocorticoid	1/61	143/17653	0.391645683	0.5364301	0.506008319	1026	1
BP	GO:0043900	regulation of multi-organism process	2/61	391/17653	0.392743912	0.5364301	0.506008319	130399/6895	2
BP	GO:0035148	tube formation	1/61	144/17653	0.393765021	0.5364301	0.506008319	5567	1
BP	GO:0048592	eye morphogenesis	1/61	144/17653	0.393765021	0.5364301	0.506008319	85407	1
BP	GO:0051017	actin filament bundle assembly	1/61	144/17653	0.393765021	0.5364301	0.506008319	4739	1
BP	GO:0060249	anatomical structure homeostasis	2/61	393/17653	0.395195429	0.5364301	0.506008319	1073/169200	2
BP	GO:0006997	nucleus organization	1/61	145/17653	0.395877097	0.5364301	0.506008319	23345	1
BP	GO:0007269	neurotransmitter secretion	1/61	145/17653	0.395877097	0.5364301	0.506008319	6809	1
BP	GO:0007605	sensory perception of sound	1/61	145/17653	0.395877097	0.5364301	0.506008319	8322	1
BP	GO:0030902	hindbrain development	1/61	145/17653	0.395877097	0.5364301	0.506008319	8322	1
BP	GO:0055123	digestive system development	1/61	145/17653	0.395877097	0.5364301	0.506008319	1026	1
BP	GO:0060402	calcium ion transport into cytosol	1/61	145/17653	0.395877097	0.5364301	0.506008319	1236	1
BP	GO:0099643	signal release from synapse	1/61	145/17653	0.395877097	0.5364301	0.506008319	6809	1
BP	GO:0002377	immunoglobulin production	1/61	146/17653	0.397981934	0.538151672	0.507632259	10721	1
BP	GO:0050806	positive regulation of synaptic transmission	1/61	146/17653	0.397981934	0.538151672	0.507632259	6809	1
BP	GO:0008643	carbohydrate transport	1/61	147/17653	0.400079558	0.539841313	0.509226077	1389	1
BP	GO:0001558	regulation of cell growth	2/61	397/17653	0.400085526	0.539841313	0.509226077	1026/29946	2
BP	GO:0009451	RNA modification	1/61	148/17653	0.402169993	0.539841313	0.509226077	154743	1
BP	GO:0016331	morphogenesis of embryonic epithelium	1/61	148/17653	0.402169993	0.539841313	0.509226077	5567	1
BP	GO:0045931	positive regulation of mitotic cell cycle	1/61	148/17653	0.402169993	0.539841313	0.509226077	55023	1
BP	GO:0061572	actin filament bundle organization	1/61	148/17653	0.402169993	0.539841313	0.509226077	4739	1
BP	GO:0034620	cellular response to unfolded protein	1/61	149/17653	0.404253262	0.539841313	0.509226077	55432	1
BP	GO:0042129	regulation of T cell proliferation	1/61	149/17653	0.404253262	0.539841313	0.509226077	3572	1
BP	GO:0043535	regulation of blood vessel endothelial cell migration	1/61	149/17653	0.404253262	0.539841313	0.509226077	161742	1
BP	GO:0051028	mRNA transport	1/61	149/17653	0.404253262	0.539841313	0.509226077	55916	1
BP	GO:0071695	anatomical structure maturation	1/61	149/17653	0.404253262	0.539841313	0.509226077	1026	1
BP	GO:1901657	glycosyl compound metabolic process	1/61	149/17653	0.404253262	0.539841313	0.509226077	51727	1
BP	GO:0010212	response to ionizing radiation	1/61	150/17653	0.406329391	0.542052651	0.511312007	1026	1
BP	GO:0006261	DNA-dependent DNA replication	1/61	151/17653	0.408398402	0.544249937	0.513384681	10721	1
BP	GO:0016125	sterol metabolic process	1/61	153/17653	0.41251517	0.549168802	0.51802459	6653	1
BP	GO:0038127	ERBB signaling pathway	1/61	154/17653	0.414562974	0.550758225	0.519523875	3092	1
BP	GO:0046425	regulation of JAK-STAT cascade	1/61	154/17653	0.414562974	0.550758225	0.519523875	3572	1
BP	GO:2001236	regulation of extrinsic apoptotic signaling pathway	1/61	155/17653	0.416603757	0.552900048	0.521544231	55023	1
BP	GO:0099531	presynaptic process involved in chemical synaptic transmission	1/61	156/17653	0.418637542	0.554458346	0.523014156	6809	1
BP	GO:1904892	regulation of STAT cascade	1/61	156/17653	0.418637542	0.554458346	0.523014156	3572	1
BP	GO:0021915	neural tube development	1/61	157/17653	0.420664353	0.55600104	0.524469362	5567	1
BP	GO:0060401	cytosolic calcium ion transport	1/61	157/17653	0.420664353	0.55600104	0.524469362	1236	1
BP	GO:0007156	homophilic cell adhesion via plasma membrane adhesion molecules	1/61	158/17653	0.422684213	0.556958769	0.525372776	2196	1
BP	GO:0050864	regulation of B cell activation	1/61	158/17653	0.422684213	0.556958769	0.525372776	1026	1
BP	GO:0051100	negative regulation of binding	1/61	158/17653	0.422684213	0.556958769	0.525372776	6653	1
BP	GO:0000077	DNA damage checkpoint	1/61	159/17653	0.424697146	0.559040121	0.527336091	1026	1
BP	GO:0006605	protein targeting	2/61	419/17653	0.426654478	0.560536758	0.528747852	64089/6653	2
BP	GO:0031960	response to corticosteroid	1/61	160/17653	0.426703175	0.560536758	0.528747852	1026	1
BP	GO:0006874	cellular calcium ion homeostasis	2/61	420/17653	0.427848362	0.561447714	0.529607146	1236/169200	2
BP	GO:0007088	regulation of mitotic nuclear division	1/61	161/17653	0.428702324	0.561447714	0.529607146	55023	1
BP	GO:0050954	sensory perception of mechanical stimulus	1/61	161/17653	0.428702324	0.561447714	0.529607146	8322	1
BP	GO:0030833	regulation of actin filament polymerization	1/61	162/17653	0.430694615	0.561775585	0.529916423	1236	1
BP	GO:0055002	striated muscle cell development	1/61	162/17653	0.430694615	0.561775585	0.529916423	1073	1
BP	GO:1901568	fatty acid derivative metabolic process	1/61	162/17653	0.430694615	0.561775585	0.529916423	11343	1
BP	GO:1902115	regulation of organelle assembly	1/61	162/17653	0.430694615	0.561775585	0.529916423	55704	1
BP	GO:0008360	regulation of cell shape	1/61	163/17653	0.432680072	0.56322633	0.531284894	55023	1
BP	GO:1905475	regulation of protein localization to membrane	1/61	163/17653	0.432680072	0.56322633	0.531284894	6809	1
BP	GO:0034470	ncRNA processing	2/61	425/17653	0.433798951	0.563545465	0.53158593	154743/6895	2
BP	GO:0044282	small molecule catabolic process	2/61	425/17653	0.433798951	0.563545465	0.53158593	11057/586	2
BP	GO:0010256	endomembrane system organization	2/61	427/17653	0.436170294	0.565487115	0.533417467	23345/23023	2
BP	GO:0051222	positive regulation of protein transport	2/61	427/17653	0.436170294	0.565487115	0.533417467	192683/6653	2
BP	GO:0007519	skeletal muscle tissue development	1/61	165/17653	0.436630576	0.565515505	0.533444246	1073	1
BP	GO:0006906	vesicle fusion	1/61	166/17653	0.438595668	0.565788412	0.533701676	6809	1
BP	GO:0007093	mitotic cell cycle checkpoint	1/61	166/17653	0.438595668	0.565788412	0.533701676	1026	1
BP	GO:0030705	cytoskeleton-dependent intracellular transport	1/61	166/17653	0.438595668	0.565788412	0.533701676	55704	1
BP	GO:0035967	cellular response to topologically incorrect protein	1/61	166/17653	0.438595668	0.565788412	0.533701676	55432	1
BP	GO:0050769	positive regulation of neurogenesis	2/61	430/17653	0.439717648	0.565928135	0.533833476	8322/3572	2
BP	GO:0043123	positive regulation of I-kappaB kinase/NF-kappaB signaling	1/61	167/17653	0.440554018	0.565928135	0.533833476	1236	1
BP	GO:0046890	regulation of lipid biosynthetic process	1/61	167/17653	0.440554018	0.565928135	0.533833476	1389	1
BP	GO:0070613	regulation of protein processing	1/61	167/17653	0.440554018	0.565928135	0.533833476	5567	1
BP	GO:0055074	calcium ion homeostasis	2/61	431/17653	0.440897501	0.565928135	0.533833476	1236/169200	2
BP	GO:0048167	regulation of synaptic plasticity	1/61	168/17653	0.442505648	0.566542737	0.534413222	6809	1
BP	GO:0002040	sprouting angiogenesis	1/61	169/17653	0.444450581	0.566542737	0.534413222	161742	1
BP	GO:0016525	negative regulation of angiogenesis	1/61	169/17653	0.444450581	0.566542737	0.534413222	161742	1
BP	GO:0031570	DNA integrity checkpoint	1/61	169/17653	0.444450581	0.566542737	0.534413222	1026	1
BP	GO:0043534	blood vessel endothelial cell migration	1/61	169/17653	0.444450581	0.566542737	0.534413222	161742	1
BP	GO:0048771	tissue remodeling	1/61	169/17653	0.444450581	0.566542737	0.534413222	169200	1
BP	GO:1903317	regulation of protein maturation	1/61	169/17653	0.444450581	0.566542737	0.534413222	5567	1
BP	GO:1903708	positive regulation of hemopoiesis	1/61	170/17653	0.44638884	0.568385007	0.536151015	169200	1
BP	GO:0006979	response to oxidative stress	2/61	436/17653	0.446777052	0.568385007	0.536151015	1236/143686	2
BP	GO:0009142	nucleoside triphosphate biosynthetic process	1/61	171/17653	0.448320447	0.568666053	0.536416122	51727	1
BP	GO:0090174	organelle membrane fusion	1/61	171/17653	0.448320447	0.568666053	0.536416122	6809	1
BP	GO:0140056	organelle localization by membrane tethering	1/61	171/17653	0.448320447	0.568666053	0.536416122	6809	1
BP	GO:0050796	regulation of insulin secretion	1/61	172/17653	0.450245424	0.569986847	0.537662011	130399	1
BP	GO:2000181	negative regulation of blood vessel morphogenesis	1/61	172/17653	0.450245424	0.569986847	0.537662011	161742	1
BP	GO:0060538	skeletal muscle organ development	1/61	173/17653	0.452163794	0.57091374	0.538536339	1073	1
BP	GO:2000377	regulation of reactive oxygen species metabolic process	1/61	173/17653	0.452163794	0.57091374	0.538536339	1026	1
BP	GO:0043254	regulation of protein complex assembly	2/61	441/17653	0.452623289	0.57091374	0.538536339	1236/6653	2
BP	GO:0009314	response to radiation	2/61	442/17653	0.453788486	0.57091374	0.538536339	993/1026	2
BP	GO:0007259	JAK-STAT cascade	1/61	174/17653	0.45407558	0.57091374	0.538536339	3572	1
BP	GO:0009408	response to heat	1/61	174/17653	0.45407558	0.57091374	0.538536339	1026	1
BP	GO:0042098	T cell proliferation	1/61	174/17653	0.45407558	0.57091374	0.538536339	3572	1
BP	GO:0043902	positive regulation of multi-organism process	1/61	175/17653	0.455980802	0.572193808	0.539743813	6895	1
BP	GO:2000045	regulation of G1/S transition of mitotic cell cycle	1/61	175/17653	0.455980802	0.572193808	0.539743813	1026	1
BP	GO:0002685	regulation of leukocyte migration	1/61	176/17653	0.457879485	0.572349356	0.539890539	1236	1
BP	GO:0019083	viral transcription	1/61	176/17653	0.457879485	0.572349356	0.539890539	6895	1
BP	GO:0030041	actin filament polymerization	1/61	176/17653	0.457879485	0.572349356	0.539890539	1236	1
BP	GO:0097696	STAT cascade	1/61	176/17653	0.457879485	0.572349356	0.539890539	3572	1
BP	GO:0055001	muscle cell development	1/61	177/17653	0.459771649	0.573048722	0.540550243	1073	1
BP	GO:0097529	myeloid leukocyte migration	1/61	177/17653	0.459771649	0.573048722	0.540550243	1236	1
BP	GO:1901796	regulation of signal transduction by p53 class mediator	1/61	177/17653	0.459771649	0.573048722	0.540550243	161742	1
BP	GO:0009156	ribonucleoside monophosphate biosynthetic process	1/61	178/17653	0.461657317	0.573859979	0.541315492	51727	1
BP	GO:0002429	immune response-activating cell surface receptor signaling pathway	2/61	450/17653	0.463060673	0.573859979	0.541315492	1236/5567	2
BP	GO:0010975	regulation of neuron projection development	2/61	450/17653	0.463060673	0.573859979	0.541315492	55704/8322	2
BP	GO:1903706	regulation of hemopoiesis	2/61	450/17653	0.463060673	0.573859979	0.541315492	8085/169200	2
BP	GO:0006986	response to unfolded protein	1/61	179/17653	0.46353651	0.573859979	0.541315492	55432	1
BP	GO:0050731	positive regulation of peptidyl-tyrosine phosphorylation	1/61	179/17653	0.46353651	0.573859979	0.541315492	3572	1
BP	GO:1901343	negative regulation of vasculature development	1/61	179/17653	0.46353651	0.573859979	0.541315492	161742	1
BP	GO:0006479	protein methylation	1/61	180/17653	0.465409251	0.574524338	0.541942175	8085	1
BP	GO:0008213	protein alkylation	1/61	180/17653	0.465409251	0.574524338	0.541942175	8085	1
BP	GO:0022406	membrane docking	1/61	180/17653	0.465409251	0.574524338	0.541942175	6809	1
BP	GO:0010498	proteasomal protein catabolic process	2/61	453/17653	0.466514818	0.575338543	0.542710204	160418/55432	2
BP	GO:0007219	Notch signaling pathway	1/61	181/17653	0.467275561	0.57565436	0.543008111	3572	1
BP	GO:1901987	regulation of cell cycle phase transition	2/61	454/17653	0.467663387	0.57565436	0.543008111	993/1026	2
BP	GO:0051346	negative regulation of hydrolase activity	2/61	456/17653	0.469956281	0.577925264	0.545150229	6653/161742	2
BP	GO:1903531	negative regulation of secretion by cell	1/61	183/17653	0.470988975	0.578230039	0.545437719	130399	1
BP	GO:0072503	cellular divalent inorganic cation homeostasis	2/61	457/17653	0.471100597	0.578230039	0.545437719	1236/169200	2
BP	GO:0034249	negative regulation of cellular amide metabolic process	2/61	458/17653	0.472243489	0.579081845	0.546241218	6653/6895	2
BP	GO:0051783	regulation of nuclear division	1/61	184/17653	0.472836123	0.579257929	0.546407316	55023	1
BP	GO:0002244	hematopoietic progenitor cell differentiation	1/61	186/17653	0.476511407	0.580487363	0.547567027	255631	1
BP	GO:0017157	regulation of exocytosis	1/61	186/17653	0.476511407	0.580487363	0.547567027	192683	1
BP	GO:0031099	regeneration	1/61	186/17653	0.476511407	0.580487363	0.547567027	1026	1
BP	GO:1904951	positive regulation of establishment of protein localization	2/61	462/17653	0.476800723	0.580487363	0.547567027	192683/6653	2
BP	GO:0042110	T cell activation	2/61	463/17653	0.47793643	0.580487363	0.547567027	1236/3572	2
BP	GO:0006367	transcription initiation from RNA polymerase II promoter	1/61	187/17653	0.478339586	0.580487363	0.547567027	1026	1
BP	GO:0007565	female pregnancy	1/61	187/17653	0.478339586	0.580487363	0.547567027	130399	1
BP	GO:0008037	cell recognition	1/61	187/17653	0.478339586	0.580487363	0.547567027	1236	1
BP	GO:0031348	negative regulation of defense response	1/61	187/17653	0.478339586	0.580487363	0.547567027	6895	1
BP	GO:0034764	positive regulation of transmembrane transport	1/61	187/17653	0.478339586	0.580487363	0.547567027	1389	1
BP	GO:0006575	cellular modified amino acid metabolic process	1/61	188/17653	0.480161485	0.581058458	0.548105734	112399	1
BP	GO:0031032	actomyosin structure organization	1/61	188/17653	0.480161485	0.581058458	0.548105734	1073	1
BP	GO:1901215	negative regulation of neuron death	1/61	188/17653	0.480161485	0.581058458	0.548105734	6653	1
BP	GO:0009124	nucleoside monophosphate biosynthetic process	1/61	189/17653	0.481977125	0.582163381	0.549147996	51727	1
BP	GO:0009749	response to glucose	1/61	189/17653	0.481977125	0.582163381	0.549147996	130399	1
BP	GO:0022604	regulation of cell morphogenesis	2/61	468/17653	0.483593169	0.583256654	0.550179267	8322/55023	2
BP	GO:0019080	viral gene expression	1/61	190/17653	0.483786527	0.583256654	0.550179267	6895	1
BP	GO:0007626	locomotory behavior	1/61	191/17653	0.485589712	0.584101452	0.550976155	8322	1
BP	GO:0097305	response to alcohol	1/61	191/17653	0.485589712	0.584101452	0.550976155	1236	1
BP	GO:0006644	phospholipid metabolic process	2/61	470/17653	0.485845626	0.584101452	0.550976155	1236/55500	2
BP	GO:0090316	positive regulation of intracellular protein transport	1/61	192/17653	0.487386702	0.585408608	0.552209181	6653	1
BP	GO:0009746	response to hexose	1/61	193/17653	0.489177516	0.586467468	0.553207991	130399	1
BP	GO:1902806	regulation of cell cycle G1/S phase transition	1/61	193/17653	0.489177516	0.586467468	0.553207991	1026	1
BP	GO:0043523	regulation of neuron apoptotic process	1/61	194/17653	0.490962176	0.58755487	0.554233725	112399	1
BP	GO:0022613	ribonucleoprotein complex biogenesis	2/61	475/17653	0.491450934	0.58755487	0.554233725	154743/6895	2
BP	GO:0072507	divalent inorganic cation homeostasis	2/61	475/17653	0.491450934	0.58755487	0.554233725	1236/169200	2
BP	GO:0015893	drug transport	1/61	195/17653	0.492740704	0.588551396	0.555173736	8322	1
BP	GO:0016458	gene silencing	2/61	477/17653	0.493682653	0.589032246	0.555627317	8085/6895	2
BP	GO:0048284	organelle fusion	1/61	196/17653	0.494513118	0.589032246	0.555627317	6809	1
BP	GO:0050792	regulation of viral process	1/61	196/17653	0.494513118	0.589032246	0.555627317	6895	1
BP	GO:0050657	nucleic acid transport	1/61	197/17653	0.496279441	0.590046525	0.556584074	55916	1
BP	GO:0050658	RNA transport	1/61	197/17653	0.496279441	0.590046525	0.556584074	55916	1
BP	GO:0034284	response to monosaccharide	1/61	198/17653	0.498039693	0.591049866	0.557530514	130399	1
BP	GO:0035966	response to topologically incorrect protein	1/61	198/17653	0.498039693	0.591049866	0.557530514	55432	1
BP	GO:0002768	immune response-regulating cell surface receptor signaling pathway	2/61	482/17653	0.499235721	0.591499196	0.557954362	1236/5567	2
BP	GO:0007188	adenylate cyclase-modulating G-protein coupled receptor signaling pathway	1/61	199/17653	0.499793894	0.591499196	0.557954362	5567	1
BP	GO:0071456	cellular response to hypoxia	1/61	199/17653	0.499793894	0.591499196	0.557954362	112399	1
BP	GO:0050852	T cell receptor signaling pathway	1/61	200/17653	0.501542065	0.592481011	0.558880496	1236	1
BP	GO:0051236	establishment of RNA localization	1/61	200/17653	0.501542065	0.592481011	0.558880496	55916	1
BP	GO:0002064	epithelial cell development	1/61	201/17653	0.503284226	0.593995106	0.560308725	1026	1
BP	GO:0030073	insulin secretion	1/61	202/17653	0.505020397	0.594955536	0.561214688	130399	1
BP	GO:0030595	leukocyte chemotaxis	1/61	202/17653	0.505020397	0.594955536	0.561214688	1236	1
BP	GO:0090276	regulation of peptide hormone secretion	1/61	203/17653	0.506750599	0.596449154	0.5626236	130399	1
BP	GO:0007163	establishment or maintenance of cell polarity	1/61	204/17653	0.508474852	0.597933053	0.564023345	1236	1
BP	GO:0090066	regulation of anatomical structure size	2/61	491/17653	0.509135819	0.598165033	0.564242169	1236/1073	2
BP	GO:0006888	ER to Golgi vesicle-mediated transport	1/61	205/17653	0.510193176	0.598317452	0.564385944	6653	1
BP	GO:0009952	anterior/posterior pattern specification	1/61	205/17653	0.510193176	0.598317452	0.564385944	85407	1
BP	GO:0051962	positive regulation of nervous system development	2/61	493/17653	0.511319015	0.598692849	0.564740052	8322/3572	2
BP	GO:0036294	cellular response to decreased oxygen levels	1/61	206/17653	0.511905591	0.598692849	0.564740052	112399	1
BP	GO:0043393	regulation of protein binding	1/61	206/17653	0.511905591	0.598692849	0.564740052	6653	1
BP	GO:0051048	negative regulation of secretion	1/61	208/17653	0.515312774	0.602131774	0.56798395	130399	1
BP	GO:0007160	cell-matrix adhesion	1/61	209/17653	0.517007582	0.603019693	0.568821514	1236	1
BP	GO:0043624	cellular protein complex disassembly	1/61	209/17653	0.517007582	0.603019693	0.568821514	1073	1
BP	GO:0010594	regulation of endothelial cell migration	1/61	210/17653	0.51869656	0.604221287	0.569954963	161742	1
BP	GO:0001894	tissue homeostasis	1/61	211/17653	0.520379729	0.604221287	0.569954963	169200	1
BP	GO:0022618	ribonucleoprotein complex assembly	1/61	211/17653	0.520379729	0.604221287	0.569954963	6895	1
BP	GO:0032271	regulation of protein polymerization	1/61	211/17653	0.520379729	0.604221287	0.569954963	1236	1
BP	GO:0048588	developmental cell growth	1/61	211/17653	0.520379729	0.604221287	0.569954963	8085	1
BP	GO:2001234	negative regulation of apoptotic signaling pathway	1/61	213/17653	0.523728715	0.607562988	0.573107151	55023	1
BP	GO:0008406	gonad development	1/61	215/17653	0.527054698	0.610323663	0.575711264	8322	1
BP	GO:0034404	nucleobase-containing small molecule biosynthetic process	1/61	215/17653	0.527054698	0.610323663	0.575711264	51727	1
BP	GO:1902749	regulation of cell cycle G2/M phase transition	1/61	216/17653	0.528709111	0.611690362	0.577000456	993	1
BP	GO:0033500	carbohydrate homeostasis	1/61	218/17653	0.53200088	0.613298601	0.578517489	143686	1
BP	GO:0042593	glucose homeostasis	1/61	218/17653	0.53200088	0.613298601	0.578517489	143686	1
BP	GO:0044706	multi-multicellular organism process	1/61	218/17653	0.53200088	0.613298601	0.578517489	130399	1
BP	GO:0060560	developmental growth involved in morphogenesis	1/61	218/17653	0.53200088	0.613298601	0.578517489	85407	1
BP	GO:0051402	neuron apoptotic process	1/61	219/17653	0.533638272	0.614088645	0.579262729	112399	1
BP	GO:0097191	extrinsic apoptotic signaling pathway	1/61	219/17653	0.533638272	0.614088645	0.579262729	55023	1
BP	GO:0006302	double-strand break repair	1/61	220/17653	0.53527003	0.614869403	0.579999208	10721	1
BP	GO:0009743	response to carbohydrate	1/61	220/17653	0.53527003	0.614869403	0.579999208	130399	1
BP	GO:0019882	antigen processing and presentation	1/61	221/17653	0.536896172	0.615640944	0.580726994	1236	1
BP	GO:0045137	development of primary sexual characteristics	1/61	221/17653	0.536896172	0.615640944	0.580726994	8322	1
BP	GO:0043903	regulation of symbiosis, encompassing mutualism through parasitism	1/61	222/17653	0.538516717	0.61640334	0.581446154	6895	1
BP	GO:0071453	cellular response to oxygen levels	1/61	222/17653	0.538516717	0.61640334	0.581446154	112399	1
BP	GO:0002440	production of molecular mediator of immune response	1/61	223/17653	0.540131683	0.616610505	0.58164157	10721	1
BP	GO:0043122	regulation of I-kappaB kinase/NF-kappaB signaling	1/61	223/17653	0.540131683	0.616610505	0.58164157	1236	1
BP	GO:0071826	ribonucleoprotein complex subunit organization	1/61	223/17653	0.540131683	0.616610505	0.58164157	6895	1
BP	GO:0051607	defense response to virus	1/61	224/17653	0.54174109	0.617900978	0.582858858	6895	1
BP	GO:0000075	cell cycle checkpoint	1/61	225/17653	0.543344957	0.618636359	0.583552534	1026	1
BP	GO:0030217	T cell differentiation	1/61	225/17653	0.543344957	0.618636359	0.583552534	1236	1
BP	GO:0031330	negative regulation of cellular catabolic process	1/61	230/17653	0.551281838	0.627119551	0.591554632	55432	1
BP	GO:0006403	RNA localization	1/61	233/17653	0.555978673	0.631905275	0.59606895	55916	1
BP	GO:0072659	protein localization to plasma membrane	1/61	234/17653	0.557533512	0.633114639	0.597209729	6809	1
BP	GO:1901991	negative regulation of mitotic cell cycle phase transition	1/61	236/17653	0.560627142	0.636067733	0.599995349	1026	1
BP	GO:0009266	response to temperature stimulus	1/61	237/17653	0.562165968	0.636693678	0.600585795	1026	1
BP	GO:0050730	regulation of peptidyl-tyrosine phosphorylation	1/61	237/17653	0.562165968	0.636693678	0.600585795	3572	1
BP	GO:0007187	G-protein coupled receptor signaling pathway, coupled to cyclic nucleotide second messenger	1/61	238/17653	0.563699494	0.636753368	0.6006421	5567	1
BP	GO:0048872	homeostasis of number of cells	1/61	238/17653	0.563699494	0.636753368	0.6006421	1236	1
BP	GO:0050714	positive regulation of protein secretion	1/61	238/17653	0.563699494	0.636753368	0.6006421	192683	1
BP	GO:0070374	positive regulation of ERK1 and ERK2 cascade	1/61	239/17653	0.565227735	0.637921066	0.601743576	1236	1
BP	GO:0015931	nucleobase-containing compound transport	1/61	240/17653	0.566750712	0.638522636	0.60231103	55916	1
BP	GO:0032388	positive regulation of intracellular transport	1/61	240/17653	0.566750712	0.638522636	0.60231103	6653	1
BP	GO:0090257	regulation of muscle system process	1/61	242/17653	0.569780939	0.640817272	0.604475534	3572	1
BP	GO:0098742	cell-cell adhesion via plasma-membrane adhesion molecules	1/61	242/17653	0.569780939	0.640817272	0.604475534	2196	1
BP	GO:0030072	peptide hormone secretion	1/61	243/17653	0.571288225	0.641394091	0.60501964	130399	1
BP	GO:0046474	glycerophospholipid biosynthetic process	1/61	243/17653	0.571288225	0.641394091	0.60501964	55500	1
BP	GO:0051091	positive regulation of DNA binding transcription factor activity	1/61	245/17653	0.574287232	0.644193316	0.607660117	8322	1
BP	GO:0006352	DNA-templated transcription, initiation	1/61	246/17653	0.575778987	0.644193316	0.607660117	1026	1
BP	GO:0006836	neurotransmitter transport	1/61	246/17653	0.575778987	0.644193316	0.607660117	6809	1
BP	GO:0051321	meiotic cell cycle	1/61	246/17653	0.575778987	0.644193316	0.607660117	5567	1
BP	GO:0043542	endothelial cell migration	1/61	249/17653	0.580223472	0.6480418	0.611290347	161742	1
BP	GO:0051650	establishment of vesicle localization	1/61	249/17653	0.580223472	0.6480418	0.611290347	6809	1
BP	GO:0007050	cell cycle arrest	1/61	250/17653	0.581694764	0.64912305	0.612310278	1026	1
BP	GO:0010951	negative regulation of endopeptidase activity	1/61	251/17653	0.583160983	0.649635292	0.61279347	6653	1
BP	GO:0090596	sensory organ morphogenesis	1/61	251/17653	0.583160983	0.649635292	0.61279347	85407	1
BP	GO:0061025	membrane fusion	1/61	253/17653	0.586078274	0.652321806	0.615327628	6809	1
BP	GO:0007162	negative regulation of cell adhesion	1/61	255/17653	0.588975479	0.654327668	0.617219734	8322	1
BP	GO:0007249	I-kappaB kinase/NF-kappaB signaling	1/61	256/17653	0.590416593	0.654327668	0.617219734	1236	1
BP	GO:0072593	reactive oxygen species metabolic process	1/61	256/17653	0.590416593	0.654327668	0.617219734	1026	1
BP	GO:1901988	negative regulation of cell cycle phase transition	1/61	256/17653	0.590416593	0.654327668	0.617219734	1026	1
BP	GO:1902105	regulation of leukocyte differentiation	1/61	256/17653	0.590416593	0.654327668	0.617219734	169200	1
BP	GO:0031334	positive regulation of protein complex assembly	1/61	257/17653	0.591852737	0.655356249	0.618189983	1236	1
BP	GO:0002793	positive regulation of peptide secretion	1/61	259/17653	0.59471018	0.657955517	0.620641842	192683	1
BP	GO:0010976	positive regulation of neuron projection development	1/61	260/17653	0.596131514	0.658834913	0.621471367	8322	1
BP	GO:0006310	DNA recombination	1/61	261/17653	0.597547945	0.658834913	0.621471367	10721	1
BP	GO:0046883	regulation of hormone secretion	1/61	261/17653	0.597547945	0.658834913	0.621471367	130399	1
BP	GO:0051648	vesicle localization	1/61	261/17653	0.597547945	0.658834913	0.621471367	6809	1
BP	GO:0044262	cellular carbohydrate metabolic process	1/61	262/17653	0.598959489	0.659827276	0.622407451	3572	1
BP	GO:0010466	negative regulation of peptidase activity	1/61	264/17653	0.601767984	0.662355545	0.624792338	6653	1
BP	GO:0006364	rRNA processing	1/61	265/17653	0.603164968	0.663327202	0.625708891	154743	1
BP	GO:1990778	protein localization to cell periphery	1/61	266/17653	0.604557131	0.664291907	0.626618886	6809	1
BP	GO:0043406	positive regulation of MAP kinase activity	1/61	268/17653	0.607327062	0.666767583	0.628954162	8322	1
BP	GO:0010632	regulation of epithelial cell migration	1/61	269/17653	0.608704861	0.667144665	0.62930986	161742	1
BP	GO:0140014	mitotic nuclear division	1/61	269/17653	0.608704861	0.667144665	0.62930986	55023	1
BP	GO:0009895	negative regulation of catabolic process	1/61	270/17653	0.610077906	0.668081917	0.630193959	55432	1
BP	GO:0045017	glycerolipid biosynthetic process	1/61	272/17653	0.612809793	0.669719004	0.631738203	55500	1
BP	GO:0090287	regulation of cellular response to growth factor stimulus	1/61	272/17653	0.612809793	0.669719004	0.631738203	8322	1
BP	GO:0007548	sex differentiation	1/61	273/17653	0.614168668	0.669719004	0.631738203	8322	1
BP	GO:0042113	B cell activation	1/61	273/17653	0.614168668	0.669719004	0.631738203	1026	1
BP	GO:0060326	cell chemotaxis	1/61	273/17653	0.614168668	0.669719004	0.631738203	1236	1
BP	GO:0048511	rhythmic process	1/61	276/17653	0.618217209	0.672995949	0.634829308	8322	1
BP	GO:0051258	protein polymerization	1/61	276/17653	0.618217209	0.672995949	0.634829308	1236	1
BP	GO:0009410	response to xenobiotic stimulus	1/61	277/17653	0.619557414	0.673318504	0.63513357	5567	1
BP	GO:0015980	energy derivation by oxidation of organic compounds	1/61	277/17653	0.619557414	0.673318504	0.63513357	3572	1
BP	GO:0051146	striated muscle cell differentiation	1/61	279/17653	0.622223957	0.675647226	0.637330227	1073	1
BP	GO:0050851	antigen receptor-mediated signaling pathway	1/61	282/17653	0.626189338	0.679381199	0.640852441	1236	1
BP	GO:0002758	innate immune response-activating signal transduction	1/61	283/17653	0.627502012	0.680233273	0.641656192	5567	1
BP	GO:0030522	intracellular receptor signaling pathway	1/61	285/17653	0.630113771	0.682490986	0.643785867	8085	1
BP	GO:0008654	phospholipid biosynthetic process	1/61	287/17653	0.632707516	0.684725416	0.645893579	55500	1
BP	GO:0018105	peptidyl-serine phosphorylation	1/61	288/17653	0.633997672	0.685546519	0.646668116	1389	1
BP	GO:0097193	intrinsic apoptotic signaling pathway	1/61	290/17653	0.636564625	0.6877457	0.648742578	1026	1
BP	GO:0007204	positive regulation of cytosolic calcium ion concentration	1/61	295/17653	0.642904788	0.694014373	0.654655745	1236	1
BP	GO:0090150	establishment of protein localization to membrane	1/61	296/17653	0.644159702	0.694787639	0.655385157	6809	1
BP	GO:0043010	camera-type eye development	1/61	297/17653	0.645410279	0.695554937	0.656108941	8322	1
BP	GO:0000209	protein polyubiquitination	1/61	298/17653	0.646656532	0.695735552	0.656279313	143279	1
BP	GO:0007568	aging	1/61	298/17653	0.646656532	0.695735552	0.656279313	1026	1
BP	GO:0016072	rRNA metabolic process	1/61	299/17653	0.647898477	0.696490863	0.656991789	154743	1
BP	GO:0002218	activation of innate immune response	1/61	301/17653	0.650369499	0.698565074	0.658948369	5567	1
BP	GO:0009260	ribonucleotide biosynthetic process	1/61	304/17653	0.654044083	0.70192751	0.662120116	51727	1
BP	GO:0001505	regulation of neurotransmitter levels	1/61	308/17653	0.658884495	0.705361825	0.665359665	6809	1
BP	GO:0046390	ribose phosphate biosynthetic process	1/61	308/17653	0.658884495	0.705361825	0.665359665	51727	1
BP	GO:0070588	calcium ion transmembrane transport	1/61	308/17653	0.658884495	0.705361825	0.665359665	1236	1
BP	GO:0009615	response to virus	1/61	310/17653	0.661279659	0.706752908	0.666671857	6895	1
BP	GO:0032102	negative regulation of response to external stimulus	1/61	310/17653	0.661279659	0.706752908	0.666671857	6895	1
BP	GO:0008202	steroid metabolic process	1/61	311/17653	0.662471029	0.707440089	0.667320068	6653	1
BP	GO:0032984	protein-containing complex disassembly	1/61	314/17653	0.666020466	0.710642184	0.670340567	1073	1
BP	GO:0019058	viral life cycle	1/61	316/17653	0.668366333	0.71196744	0.671590666	6895	1
BP	GO:0060562	epithelial tube morphogenesis	1/61	316/17653	0.668366333	0.71196744	0.671590666	5567	1
BP	GO:0045930	negative regulation of mitotic cell cycle	1/61	319/17653	0.671854778	0.715092956	0.674538929	1026	1
BP	GO:0018209	peptidyl-serine modification	1/61	322/17653	0.675307122	0.718174928	0.677446117	1389	1
BP	GO:0048638	regulation of developmental growth	1/61	323/17653	0.676449945	0.718797718	0.678033588	85407	1
BP	GO:0006066	alcohol metabolic process	1/61	324/17653	0.677588811	0.719415281	0.678616128	6653	1
BP	GO:0000377	RNA splicing, via transesterification reactions with bulged adenosine as nucleophile	1/61	326/17653	0.679854728	0.720634839	0.679766523	23524	1
BP	GO:0000398	mRNA splicing, via spliceosome	1/61	326/17653	0.679854728	0.720634839	0.679766523	23524	1
BP	GO:0032496	response to lipopolysaccharide	1/61	327/17653	0.680981805	0.721236887	0.680334428	1236	1
BP	GO:0000375	RNA splicing, via transesterification reactions	1/61	329/17653	0.683224263	0.721830069	0.68089397	23524	1
BP	GO:0006959	humoral immune response	1/61	329/17653	0.683224263	0.721830069	0.68089397	1236	1
BP	GO:0016485	protein processing	1/61	329/17653	0.683224263	0.721830069	0.68089397	5567	1
BP	GO:0006909	phagocytosis	1/61	330/17653	0.68433967	0.721830069	0.68089397	94134	1
BP	GO:0030098	lymphocyte differentiation	1/61	330/17653	0.68433967	0.721830069	0.68089397	1236	1
BP	GO:0042254	ribosome biogenesis	1/61	335/17653	0.68985902	0.725836615	0.684673298	154743	1
BP	GO:0050804	modulation of chemical synaptic transmission	1/61	335/17653	0.68985902	0.725836615	0.684673298	6809	1
BP	GO:0099177	regulation of trans-synaptic signaling	1/61	335/17653	0.68985902	0.725836615	0.684673298	6809	1
BP	GO:0007178	transmembrane receptor protein serine/threonine kinase signaling pathway	1/61	336/17653	0.690951444	0.725836615	0.684673298	130399	1
BP	GO:0009161	ribonucleoside monophosphate metabolic process	1/61	336/17653	0.690951444	0.725836615	0.684673298	51727	1
BP	GO:0009141	nucleoside triphosphate metabolic process	1/61	337/17653	0.692040083	0.726388696	0.68519407	51727	1
BP	GO:0007596	blood coagulation	1/61	341/17653	0.696357046	0.730325683	0.688907784	5567	1
BP	GO:0009101	glycoprotein biosynthetic process	1/61	342/17653	0.697426953	0.73085359	0.689405753	1236	1
BP	GO:0045666	positive regulation of neuron differentiation	1/61	343/17653	0.698493151	0.731376757	0.68989925	8322	1
BP	GO:0002237	response to molecule of bacterial origin	1/61	345/17653	0.700614473	0.732325091	0.690793802	1236	1
BP	GO:0035195	gene silencing by miRNA	1/61	345/17653	0.700614473	0.732325091	0.690793802	6895	1
BP	GO:0001666	response to hypoxia	1/61	346/17653	0.701669622	0.732325091	0.690793802	112399	1
BP	GO:0007599	hemostasis	1/61	346/17653	0.701669622	0.732325091	0.690793802	5567	1
BP	GO:0050817	coagulation	1/61	347/17653	0.702721113	0.732829616	0.691269716	5567	1
BP	GO:0051098	regulation of binding	1/61	349/17653	0.70481317	0.734417601	0.692767643	6653	1
BP	GO:0010948	negative regulation of cell cycle process	1/61	350/17653	0.705853762	0.734908275	0.69323049	1026	1
BP	GO:0009123	nucleoside monophosphate metabolic process	1/61	352/17653	0.707924132	0.735760722	0.694034593	51727	1
BP	GO:0035194	posttranscriptional gene silencing by RNA	1/61	352/17653	0.707924132	0.735760722	0.694034593	6895	1
BP	GO:0016441	posttranscriptional gene silencing	1/61	353/17653	0.708953936	0.735760722	0.694034593	6895	1
BP	GO:0045089	positive regulation of innate immune response	1/61	353/17653	0.708953936	0.735760722	0.694034593	5567	1
BP	GO:0036293	response to decreased oxygen levels	1/61	354/17653	0.709980167	0.736233453	0.694480516	112399	1
BP	GO:0071902	positive regulation of protein serine/threonine kinase activity	1/61	355/17653	0.71100284	0.736701738	0.694922243	8322	1
BP	GO:0048193	Golgi vesicle transport	1/61	360/17653	0.716063234	0.741349577	0.699306496	6653	1
BP	GO:1903532	positive regulation of secretion by cell	1/61	361/17653	0.717064804	0.741791177	0.699723052	192683	1
BP	GO:0006650	glycerophospholipid metabolic process	1/61	362/17653	0.718062898	0.742228477	0.700135552	55500	1
BP	GO:0060271	cilium assembly	1/61	365/17653	0.721036448	0.744705379	0.702471985	55704	1
BP	GO:0045765	regulation of angiogenesis	1/61	366/17653	0.72202076	0.745125424	0.702868209	161742	1
BP	GO:0009165	nucleotide biosynthetic process	1/61	369/17653	0.724953242	0.747553703	0.705158777	51727	1
BP	GO:1901293	nucleoside phosphate biosynthetic process	1/61	373/17653	0.728815932	0.750936543	0.708349771	51727	1
BP	GO:0044782	cilium organization	1/61	378/17653	0.733569328	0.754393361	0.711610547	55704	1
BP	GO:0014706	striated muscle tissue development	1/61	379/17653	0.734510125	0.754393361	0.711610547	1073	1
BP	GO:0018108	peptidyl-tyrosine phosphorylation	1/61	379/17653	0.734510125	0.754393361	0.711610547	3572	1
BP	GO:0031047	gene silencing by RNA	1/61	379/17653	0.734510125	0.754393361	0.711610547	6895	1
BP	GO:0018212	peptidyl-tyrosine modification	1/61	382/17653	0.737312954	0.756669619	0.713757715	3572	1
BP	GO:2001233	regulation of apoptotic signaling pathway	1/61	383/17653	0.738240747	0.757019526	0.714087778	55023	1
BP	GO:0051047	positive regulation of secretion	1/61	388/17653	0.742831581	0.761122112	0.7179577	192683	1
BP	GO:0018205	peptidyl-lysine modification	1/61	390/17653	0.744645657	0.762375315	0.719139832	8085	1
BP	GO:0043062	extracellular structure organization	1/61	395/17653	0.749125962	0.766046225	0.722602559	5567	1
BP	GO:0060537	muscle tissue development	1/61	396/17653	0.750012699	0.766046225	0.722602559	1073	1
BP	GO:1901342	regulation of vasculature development	1/61	396/17653	0.750012699	0.766046225	0.722602559	161742	1
BP	GO:0007517	muscle organ development	1/61	398/17653	0.751776936	0.767240702	0.723729295	1073	1
BP	GO:0016050	vesicle organization	1/61	402/17653	0.755268748	0.770195008	0.726516058	6809	1
BP	GO:0043161	proteasome-mediated ubiquitin-dependent protein catabolic process	1/61	403/17653	0.756134124	0.770468421	0.726773965	55432	1
BP	GO:0002697	regulation of immune effector process	1/61	405/17653	0.757855857	0.771613304	0.72785392	6895	1
BP	GO:0000280	nuclear division	1/61	411/17653	0.762949635	0.776186931	0.73216817	55023	1
BP	GO:0006816	calcium ion transport	1/61	413/17653	0.764624024	0.776665348	0.732619455	1236	1
BP	GO:0009100	glycoprotein metabolic process	1/61	413/17653	0.764624024	0.776665348	0.732619455	1236	1
BP	GO:0051090	regulation of DNA binding transcription factor activity	1/61	416/17653	0.767113819	0.778581295	0.734426746	8322	1
BP	GO:1901990	regulation of mitotic cell cycle phase transition	1/61	419/17653	0.769577704	0.780467954	0.73620641	1026	1
BP	GO:0002683	negative regulation of immune system process	1/61	426/17653	0.775227493	0.785580099	0.741028637	6895	1
BP	GO:0045088	regulation of innate immune response	1/61	427/17653	0.776023402	0.785769379	0.741207182	5567	1
BP	GO:0048608	reproductive structure development	1/61	430/17653	0.778394533	0.787552116	0.742888818	8322	1
BP	GO:0008380	RNA splicing	1/61	432/17653	0.779961553	0.788519124	0.743800986	23524	1
BP	GO:0061458	reproductive system development	1/61	433/17653	0.78074097	0.788688999	0.743961226	8322	1
BP	GO:0017148	negative regulation of translation	1/61	442/17653	0.787634627	0.795030258	0.749942862	6895	1
BP	GO:0003012	muscle system process	1/61	450/17653	0.793583054	0.799158579	0.75383706	3572	1
BP	GO:0016570	histone modification	1/61	450/17653	0.793583054	0.799158579	0.75383706	8085	1
BP	GO:0051656	establishment of organelle localization	1/61	450/17653	0.793583054	0.799158579	0.75383706	6809	1
BP	GO:0048285	organelle fission	1/61	457/17653	0.798653274	0.80363707	0.758061569	55023	1
BP	GO:0070838	divalent metal ion transport	1/61	458/17653	0.799367519	0.803728838	0.758148133	1236	1
BP	GO:0072511	divalent inorganic cation transport	1/61	462/17653	0.80219966	0.805948256	0.760241685	1236	1
BP	GO:0016569	covalent chromatin modification	1/61	464/17653	0.803600947	0.806727799	0.760977018	8085	1
BP	GO:0050900	leukocyte migration	1/61	470/17653	0.807746482	0.810258913	0.764307877	1236	1
BP	GO:0030335	positive regulation of cell migration	1/61	486/17653	0.818385079	0.820292737	0.773772667	1236	1
BP	GO:0006397	mRNA processing	1/61	495/17653	0.824112563	0.82539224	0.77858297	23524	1
BP	GO:1901615	organic hydroxy compound metabolic process	1/61	497/17653	0.825361003	0.826001314	0.779157503	6653	1
BP	GO:0050878	regulation of body fluid levels	1/61	499/17653	0.826600727	0.826600727	0.779722922	5567	1
CC	GO:0035859	Seh1-associated complex	2/69	16/18698	0.001557591	0.281923928	0.255772798	154743/143686	2
CC	GO:0030669	clathrin-coated endocytic vesicle membrane	2/69	43/18698	0.010992856	0.305244866	0.276930498	8322/3092	2
CC	GO:0008287	protein serine/threonine phosphatase complex	2/69	50/18698	0.014668023	0.305244866	0.276930498	85407/8036	2
CC	GO:1903293	phosphatase complex	2/69	50/18698	0.014668023	0.305244866	0.276930498	85407/8036	2
CC	GO:0031201	SNARE complex	2/69	52/18698	0.01580258	0.305244866	0.276930498	192683/6809	2
CC	GO:0015030	Cajal body	2/69	56/18698	0.01818053	0.305244866	0.276930498	4863/23524	2
CC	GO:0045171	intercellular bridge	2/69	57/18698	0.018797269	0.305244866	0.276930498	5567/8625	2
CC	GO:0045334	clathrin-coated endocytic vesicle	2/69	62/18698	0.0220109	0.305244866	0.276930498	8322/3092	2
CC	GO:0097060	synaptic membrane	4/69	317/18698	0.029641107	0.305244866	0.276930498	3092/23362/6809/23345	4
CC	GO:0030027	lamellipodium	3/69	187/18698	0.031871222	0.305244866	0.276930498	55704/4739/6809	3
CC	GO:0042734	presynaptic membrane	2/69	79/18698	0.034458608	0.305244866	0.276930498	3092/6809	2
CC	GO:0034992	microtubule organizing center attachment site	1/69	10/18698	0.036304125	0.305244866	0.276930498	23345	1
CC	GO:0034993	meiotic nuclear membrane microtubule tethering complex	1/69	10/18698	0.036304125	0.305244866	0.276930498	23345	1
CC	GO:0106083	nuclear membrane protein complex	1/69	10/18698	0.036304125	0.305244866	0.276930498	23345	1
CC	GO:0106094	nuclear membrane microtubule tethering complex	1/69	10/18698	0.036304125	0.305244866	0.276930498	23345	1
CC	GO:1902554	serine/threonine protein kinase complex	2/69	85/18698	0.039370759	0.305244866	0.276930498	130399/1026	2
CC	GO:0016442	RISC complex	1/69	11/18698	0.039862292	0.305244866	0.276930498	6895	1
CC	GO:0031332	RNAi effector complex	1/69	11/18698	0.039862292	0.305244866	0.276930498	6895	1
CC	GO:0042589	zymogen granule membrane	1/69	11/18698	0.039862292	0.305244866	0.276930498	6809	1
CC	GO:0044666	MLL3/4 complex	1/69	11/18698	0.039862292	0.305244866	0.276930498	8085	1
CC	GO:0061700	GATOR2 complex	1/69	11/18698	0.039862292	0.305244866	0.276930498	143686	1
CC	GO:0106003	amyloid-beta complex	1/69	11/18698	0.039862292	0.305244866	0.276930498	8322	1
CC	GO:0097504	Gemini of coiled bodies	1/69	12/18698	0.04340751	0.305244866	0.276930498	4863	1
CC	GO:0031932	TORC2 complex	1/69	13/18698	0.046939828	0.305244866	0.276930498	143686	1
CC	GO:0042588	zymogen granule	1/69	13/18698	0.046939828	0.305244866	0.276930498	6809	1
CC	GO:0000164	protein phosphatase type 1 complex	1/69	14/18698	0.05045929	0.305244866	0.276930498	8036	1
CC	GO:0030122	AP-2 adaptor complex	1/69	14/18698	0.05045929	0.305244866	0.276930498	3092	1
CC	GO:0034362	low-density lipoprotein particle	1/69	14/18698	0.05045929	0.305244866	0.276930498	6653	1
CC	GO:0044613	nuclear pore central transport channel	1/69	14/18698	0.05045929	0.305244866	0.276930498	55916	1
CC	GO:1902911	protein kinase complex	2/69	99/18698	0.051777675	0.305244866	0.276930498	130399/1026	2
CC	GO:0031252	cell leading edge	4/69	385/18698	0.053855811	0.305244866	0.276930498	55704/4739/23362/6809	4
CC	GO:0030128	clathrin coat of endocytic vesicle	1/69	15/18698	0.053965943	0.305244866	0.276930498	3092	1
CC	GO:0030665	clathrin-coated vesicle membrane	2/69	104/18698	0.056506205	0.305889113	0.277514985	8322/3092	2
CC	GO:0038201	TOR complex	1/69	16/18698	0.057459833	0.305889113	0.277514985	143686	1
CC	GO:0045211	postsynaptic membrane	3/69	244/18698	0.061394723	0.317498424	0.288047421	3092/23362/23345	3
CC	GO:0030132	clathrin coat of coated pit	1/69	19/18698	0.067865382	0.341212061	0.309561393	3092	1
CC	GO:0000159	protein phosphatase type 2A complex	1/69	21/18698	0.074739435	0.365617234	0.331702754	85407	1
CC	GO:0030904	retromer complex	1/69	22/18698	0.078157702	0.372277475	0.337745194	9559	1
CC	GO:0001891	phagocytic cup	1/69	23/18698	0.081563523	0.376005078	0.341127026	94134	1
CC	GO:0098794	postsynapse	4/69	450/18698	0.084642593	0.376005078	0.341127026	3092/23362/6809/23345	4
CC	GO:0010008	endosome membrane	4/69	451/18698	0.085172421	0.376005078	0.341127026	192683/64089/6653/9559	4
CC	GO:0005640	nuclear outer membrane	1/69	25/18698	0.088338006	0.380694741	0.345381678	23345	1
CC	GO:0019898	extrinsic component of membrane	3/69	289/18698	0.091151269	0.38368325	0.348092975	3092/11343/64089	3
CC	GO:0030125	clathrin vesicle coat	1/69	27/18698	0.095063239	0.388076981	0.352079145	3092	1
CC	GO:0071007	U2-type catalytic step 2 spliceosome	1/69	29/18698	0.101739574	0.388076981	0.352079145	23524	1
CC	GO:1902555	endoribonuclease complex	1/69	29/18698	0.101739574	0.388076981	0.352079145	6895	1
CC	GO:1905348	endonuclease complex	1/69	29/18698	0.101739574	0.388076981	0.352079145	6895	1
CC	GO:0030131	clathrin adaptor complex	1/69	30/18698	0.105059514	0.388076981	0.352079145	3092	1
CC	GO:0097546	ciliary base	1/69	30/18698	0.105059514	0.388076981	0.352079145	5567	1
CC	GO:0044440	endosomal part	4/69	496/18698	0.11067303	0.400636367	0.363473529	192683/64089/6653/9559	4
CC	GO:0030666	endocytic vesicle membrane	2/69	161/18698	0.119139136	0.412888535	0.374589191	8322/3092	2
CC	GO:0055037	recycling endosome	2/69	165/18698	0.124012208	0.412888535	0.374589191	192683/6653	2
CC	GO:0005769	early endosome	3/69	334/18698	0.12577628	0.412888535	0.374589191	64089/6653/9559	3
CC	GO:0031312	extrinsic component of organelle membrane	1/69	37/18698	0.127962908	0.412888535	0.374589191	64089	1
CC	GO:0030662	coated vesicle membrane	2/69	171/18698	0.131411331	0.412888535	0.374589191	8322/3092	2
CC	GO:0034358	plasma lipoprotein particle	1/69	39/18698	0.134399961	0.412888535	0.374589191	6653	1
CC	GO:1990777	lipoprotein particle	1/69	39/18698	0.134399961	0.412888535	0.374589191	6653	1
CC	GO:0008021	synaptic vesicle	2/69	176/18698	0.137654187	0.412888535	0.374589191	192683/6809	2
CC	GO:0000307	cyclin-dependent protein kinase holoenzyme complex	1/69	41/18698	0.140790182	0.412888535	0.374589191	1026	1
CC	GO:0032994	protein-lipid complex	1/69	41/18698	0.140790182	0.412888535	0.374589191	6653	1
CC	GO:0030136	clathrin-coated vesicle	2/69	179/18698	0.141431432	0.412888535	0.374589191	8322/3092	2
CC	GO:0098802	plasma membrane receptor complex	2/69	179/18698	0.141431432	0.412888535	0.374589191	130399/3572	2
CC	GO:0070382	exocytic vesicle	2/69	190/18698	0.155466608	0.441558607	0.400599841	192683/6809	2
CC	GO:0030119	AP-type membrane coat adaptor complex	1/69	47/18698	0.159683196	0.441558607	0.400599841	3092	1
CC	GO:0043235	receptor complex	3/69	374/18698	0.159921967	0.441558607	0.400599841	130399/3572/53353	3
CC	GO:0098793	presynapse	3/69	379/18698	0.164378695	0.441558607	0.400599841	3092/192683/6809	3
CC	GO:0030017	sarcomere	2/69	197/18698	0.164534876	0.441558607	0.400599841	1073/23345	2
CC	GO:0030118	clathrin coat	1/69	49/18698	0.165889422	0.441558607	0.400599841	3092	1
CC	GO:0005802	trans-Golgi network	2/69	202/18698	0.17106994	0.448748683	0.407122969	192683/6653	2
CC	GO:0030120	vesicle coat	1/69	55/18698	0.184238329	0.47638768	0.432198186	3092	1
CC	GO:0044449	contractile fiber part	2/69	214/18698	0.186925502	0.476528393	0.432325846	1073/23345	2
CC	GO:0030016	myofibril	2/69	219/18698	0.193594341	0.486674663	0.441530953	1073/23345	2
CC	GO:0005684	U2-type spliceosomal complex	1/69	60/18698	0.199224756	0.49396823	0.448147973	23524	1
CC	GO:0043292	contractile fiber	2/69	230/18698	0.208372247	0.509667253	0.462390761	1073/23345	2
CC	GO:0005905	clathrin-coated pit	1/69	67/18698	0.219750891	0.527291267	0.478379981	3092	1
CC	GO:0005911	cell-cell junction	3/69	440/18698	0.221404068	0.527291267	0.478379981	2196/8322/6809	3
CC	GO:0043195	terminal bouton	1/69	71/18698	0.231246384	0.536057238	0.486332824	6809	1
CC	GO:0055038	recycling endosome membrane	1/69	72/18698	0.234094078	0.536057238	0.486332824	192683	1
CC	GO:0005635	nuclear envelope	3/69	455/18698	0.236026938	0.536057238	0.486332824	55916/6653/23345	3
CC	GO:0035097	histone methyltransferase complex	1/69	73/18698	0.236931376	0.536057238	0.486332824	8085	1
CC	GO:0030864	cortical actin cytoskeleton	1/69	75/18698	0.242574932	0.540501661	0.490364985	3092	1
CC	GO:0005901	caveola	1/69	78/18698	0.250963223	0.540501661	0.490364985	161742	1
CC	GO:0005643	nuclear pore	1/69	82/18698	0.262005346	0.540501661	0.490364985	55916	1
CC	GO:0000932	P-body	1/69	84/18698	0.267466092	0.540501661	0.490364985	23345	1
CC	GO:0032588	trans-Golgi network membrane	1/69	85/18698	0.270181512	0.540501661	0.490364985	192683	1
CC	GO:0030135	coated vesicle	2/69	276/18698	0.27109452	0.540501661	0.490364985	8322/3092	2
CC	GO:0061695	transferase complex, transferring phosphorus-containing groups	2/69	277/18698	0.272464623	0.540501661	0.490364985	130399/1026	2
CC	GO:0031970	organelle envelope lumen	1/69	86/18698	0.272887013	0.540501661	0.490364985	6653	1
CC	GO:0036126	sperm flagellum	1/69	86/18698	0.272887013	0.540501661	0.490364985	11057	1
CC	GO:0097729	9+2 motile cilium	1/69	86/18698	0.272887013	0.540501661	0.490364985	11057	1
CC	GO:0005581	collagen trimer	1/69	88/18698	0.278268395	0.540501661	0.490364985	255631	1
CC	GO:0005791	rough endoplasmic reticulum	1/69	90/18698	0.283610522	0.540501661	0.490364985	23023	1
CC	GO:0032587	ruffle membrane	1/69	90/18698	0.283610522	0.540501661	0.490364985	23362	1
CC	GO:0009897	external side of plasma membrane	2/69	287/18698	0.286160657	0.540501661	0.490364985	1236/3572	2
CC	GO:0030139	endocytic vesicle	2/69	290/18698	0.290266106	0.540501661	0.490364985	8322/3092	2
CC	GO:0034708	methyltransferase complex	1/69	95/18698	0.296795947	0.540501661	0.490364985	8085	1
CC	GO:0005938	cell cortex	2/69	296/18698	0.298469468	0.540501661	0.490364985	3092/4739	2
CC	GO:0030117	membrane coat	1/69	98/18698	0.304592096	0.540501661	0.490364985	3092	1
CC	GO:0030672	synaptic vesicle membrane	1/69	98/18698	0.304592096	0.540501661	0.490364985	192683	1
CC	GO:0044853	plasma membrane raft	1/69	98/18698	0.304592096	0.540501661	0.490364985	161742	1
CC	GO:0048475	coated membrane	1/69	98/18698	0.304592096	0.540501661	0.490364985	3092	1
CC	GO:0099501	exocytic vesicle membrane	1/69	98/18698	0.304592096	0.540501661	0.490364985	192683	1
CC	GO:0071013	catalytic step 2 spliceosome	1/69	101/18698	0.312303052	0.544621981	0.494103106	23524	1
CC	GO:0000777	condensed chromosome kinetochore	1/69	104/18698	0.319929731	0.544621981	0.494103106	84295	1
CC	GO:0030863	cortical cytoskeleton	1/69	105/18698	0.322453386	0.544621981	0.494103106	3092	1
CC	GO:0016363	nuclear matrix	1/69	106/18698	0.324967812	0.544621981	0.494103106	1073	1
CC	GO:0042470	melanosome	1/69	106/18698	0.324967812	0.544621981	0.494103106	6809	1
CC	GO:0048770	pigment granule	1/69	106/18698	0.324967812	0.544621981	0.494103106	6809	1
CC	GO:0005913	cell-cell adherens junction	1/69	110/18698	0.334933881	0.546153445	0.495492512	2196	1
CC	GO:0031234	extrinsic component of cytoplasmic side of plasma membrane	1/69	110/18698	0.334933881	0.546153445	0.495492512	3092	1
CC	GO:0036064	ciliary basal body	1/69	110/18698	0.334933881	0.546153445	0.495492512	55704	1
CC	GO:0031985	Golgi cisterna	1/69	112/18698	0.339862396	0.548306885	0.4974462	6653	1
CC	GO:0001669	acrosomal vesicle	1/69	113/18698	0.342313138	0.548306885	0.4974462	11057	1
CC	GO:0000779	condensed chromosome, centromeric region	1/69	117/18698	0.35202676	0.558919681	0.507074558	84295	1
CC	GO:0043679	axon terminus	1/69	123/18698	0.366332675	0.576575776	0.523092882	6809	1
CC	GO:0030018	Z disc	1/69	125/18698	0.371031788	0.577604182	0.524025893	1073	1
CC	GO:0031902	late endosome membrane	1/69	126/18698	0.373368449	0.577604182	0.524025893	64089	1
CC	GO:0005814	centriole	1/69	129/18698	0.380327223	0.583383282	0.529268927	55704	1
CC	GO:0034399	nuclear periphery	1/69	131/18698	0.384924038	0.585472696	0.531164528	1073	1
CC	GO:0000776	kinetochore	1/69	133/18698	0.389487243	0.587476592	0.532982544	84295	1
CC	GO:0031674	I band	1/69	138/18698	0.400749802	0.592999584	0.537993226	1073	1
CC	GO:0031901	early endosome membrane	1/69	138/18698	0.400749802	0.592999584	0.537993226	64089	1
CC	GO:0044306	neuron projection terminus	1/69	139/18698	0.402977618	0.592999584	0.537993226	6809	1
CC	GO:0030133	transport vesicle	2/69	381/18698	0.411915773	0.599464536	0.543858491	192683/6809	2
CC	GO:0005795	Golgi stack	1/69	144/18698	0.413994845	0.599464536	0.543858491	6653	1
CC	GO:0005925	focal adhesion	2/69	393/18698	0.427289307	0.599949646	0.544298603	23092/4739	2
CC	GO:0005924	cell-substrate adherens junction	2/69	396/18698	0.431101124	0.599949646	0.544298603	23092/4739	2
CC	GO:0000922	spindle pole	1/69	153/18698	0.433323225	0.599949646	0.544298603	4739	1
CC	GO:0030426	growth cone	1/69	154/18698	0.435431647	0.599949646	0.544298603	6809	1
CC	GO:0030055	cell-substrate junction	2/69	401/18698	0.437425168	0.599949646	0.544298603	23092/4739	2
CC	GO:0005766	primary lysosome	1/69	155/18698	0.437532339	0.599949646	0.544298603	6809	1
CC	GO:0042582	azurophil granule	1/69	155/18698	0.437532339	0.599949646	0.544298603	6809	1
CC	GO:0031514	motile cilium	1/69	157/18698	0.441710638	0.60054566	0.544839331	11057	1
CC	GO:0030427	site of polarized growth	1/69	159/18698	0.445858345	0.60054566	0.544839331	6809	1
CC	GO:0042581	specific granule	1/69	160/18698	0.447920796	0.60054566	0.544839331	6809	1
CC	GO:0001726	ruffle	1/69	164/18698	0.456095218	0.603513785	0.547532134	23362	1
CC	GO:0031256	leading edge membrane	1/69	165/18698	0.458120115	0.603513785	0.547532134	23362	1
CC	GO:0044448	cell cortex part	1/69	166/18698	0.460137582	0.603513785	0.547532134	3092	1
CC	GO:0019897	extrinsic component of plasma membrane	1/69	171/18698	0.470114408	0.610342159	0.553727112	3092	1
CC	GO:0044450	microtubule organizing center part	1/69	172/18698	0.472087858	0.610342159	0.553727112	55704	1
CC	GO:0044441	ciliary part	2/69	432/18698	0.475781308	0.610754728	0.554101411	55704/5567	2
CC	GO:0009898	cytoplasmic side of plasma membrane	1/69	176/18698	0.479909483	0.611715609	0.554973161	3092	1
CC	GO:0005681	spliceosomal complex	1/69	190/18698	0.506396331	0.630878642	0.57235864	23524	1
CC	GO:0036464	cytoplasmic ribonucleoprotein granule	1/69	191/18698	0.508236544	0.630878642	0.57235864	23345	1
CC	GO:0097223	sperm part	1/69	193/18698	0.511896709	0.630878642	0.57235864	11057	1
CC	GO:0000775	chromosome, centromeric region	1/69	194/18698	0.51371671	0.630878642	0.57235864	84295	1
CC	GO:0099568	cytoplasmic region	2/69	468/18698	0.518336202	0.630878642	0.57235864	3092/4739	2
CC	GO:0098562	cytoplasmic side of membrane	1/69	199/18698	0.522716877	0.630878642	0.57235864	3092	1
CC	GO:0035770	ribonucleoprotein granule	1/69	200/18698	0.52449711	0.630878642	0.57235864	23345	1
CC	GO:0031968	organelle outer membrane	1/69	201/18698	0.526270799	0.630878642	0.57235864	23345	1
CC	GO:0019867	outer membrane	1/69	203/18698	0.529798639	0.630878642	0.57235864	23345	1
CC	GO:0030658	transport vesicle membrane	1/69	203/18698	0.529798639	0.630878642	0.57235864	192683	1
CC	GO:0015629	actin cytoskeleton	2/69	487/18698	0.539878024	0.638459482	0.579236285	1073/3092	2
CC	GO:0005813	centrosome	2/69	490/18698	0.54321967	0.638459482	0.579236285	55704/5567	2
CC	GO:0000793	condensed chromosome	1/69	217/18698	0.553778889	0.646670832	0.586685954	84295	1
CC	GO:0014069	postsynaptic density	1/69	227/18698	0.570165629	0.661020166	0.599704251	23362	1
CC	GO:0099572	postsynaptic specialization	1/69	229/18698	0.573371083	0.661020166	0.599704251	23362	1
CC	GO:0032279	asymmetric synapse	1/69	232/18698	0.578135143	0.662294056	0.600859975	23362	1
CC	GO:0098984	neuron to neuron synapse	1/69	235/18698	0.582846765	0.66349223	0.601947007	23362	1
CC	GO:0005770	late endosome	1/69	240/18698	0.590584486	0.6680987	0.606126183	64089	1
CC	GO:0150034	distal axon	1/69	268/18698	0.631372202	0.709803531	0.643962494	6809	1
CC	GO:0005788	endoplasmic reticulum lumen	1/69	297/18698	0.669393827	0.73481246	0.666651607	255631	1
CC	GO:0016324	apical plasma membrane	1/69	300/18698	0.673099217	0.73481246	0.666651607	6809	1
CC	GO:0045121	membrane raft	1/69	302/18698	0.675546707	0.73481246	0.666651607	161742	1
CC	GO:0030667	secretory granule membrane	1/69	303/18698	0.676763672	0.73481246	0.666651607	6809	1
CC	GO:0098857	membrane microdomain	1/69	303/18698	0.676763672	0.73481246	0.666651607	161742	1
CC	GO:0031965	nuclear membrane	1/69	304/18698	0.677976138	0.73481246	0.666651607	23345	1
CC	GO:0098589	membrane region	1/69	314/18698	0.689856942	0.743238729	0.674296259	161742	1
CC	GO:0005819	spindle	1/69	324/18698	0.701305535	0.751102378	0.68143048	4739	1
CC	GO:0031253	cell projection membrane	1/69	332/18698	0.710163652	0.756115418	0.685978512	23362	1
CC	GO:0005667	transcription factor complex	1/69	345/18698	0.724009016	0.759386891	0.688946525	83439	1
CC	GO:0098687	chromosomal region	1/69	347/18698	0.726080404	0.759386891	0.688946525	84295	1
CC	GO:0033267	axon part	1/69	353/18698	0.73220308	0.759386891	0.688946525	6809	1
CC	GO:0005765	lysosomal membrane	1/69	355/18698	0.734213844	0.759386891	0.688946525	28962	1
CC	GO:0098852	lytic vacuole membrane	1/69	355/18698	0.734213844	0.759386891	0.688946525	28962	1
CC	GO:0045177	apical part of cell	1/69	366/18698	0.745009949	0.766175004	0.695104976	6809	1
CC	GO:0005578	proteinaceous extracellular matrix	1/69	375/18698	0.753520702	0.770549419	0.699073622	255631	1
CC	GO:0016607	nuclear speck	1/69	381/18698	0.759038371	0.771831152	0.700236462	23524	1
CC	GO:0005774	vacuolar membrane	1/69	414/18698	0.787278648	0.796075057	0.722231515	28962	1
CC	GO:0043025	neuronal cell body	1/69	449/18698	0.813668541	0.818188922	0.742294108	3572	1
CC	GO:0031012	extracellular matrix	1/69	479/18698	0.833700447	0.833700447	0.756366791	255631	1
MF	GO:0047372	acylglycerol lipase activity	2/63	12/17548	0.000818049	0.147248895	0.127443488	11057/11343	2
MF	GO:0019955	cytokine binding	3/63	103/17548	0.006042943	0.243637312	0.210867381	1236/8322/3572	3
MF	GO:0030291	protein serine/threonine kinase inhibitor activity	2/63	33/17548	0.00623466	0.243637312	0.210867381	1026/161742	2
MF	GO:0047485	protein N-terminus binding	3/63	109/17548	0.007065176	0.243637312	0.210867381	4863/23524/6895	3
MF	GO:0003779	actin binding	5/63	410/17548	0.015769076	0.243637312	0.210867381	55704/1073/23500/3092/23345	5
MF	GO:0001540	amyloid-beta binding	2/63	57/17548	0.017835489	0.243637312	0.210867381	8322/6653	2
MF	GO:0051015	actin filament binding	3/63	174/17548	0.024653108	0.243637312	0.210867381	1073/3092/23345	3
MF	GO:0031625	ubiquitin protein ligase binding	4/63	309/17548	0.024934035	0.243637312	0.210867381	1026/8322/5567/55432	4
MF	GO:0044389	ubiquitin-like protein ligase binding	4/63	323/17548	0.028718577	0.243637312	0.210867381	1026/8322/5567/55432	4
MF	GO:0031406	carboxylic acid binding	3/63	189/17548	0.03047125	0.243637312	0.210867381	112399/143686/6809	3
MF	GO:0043177	organic acid binding	3/63	191/17548	0.03129715	0.243637312	0.210867381	112399/143686/6809	3
MF	GO:0019957	C-C chemokine binding	1/63	10/17548	0.035335948	0.243637312	0.210867381	1236	1
MF	GO:0038024	cargo receptor activity	2/63	85/17548	0.037427895	0.243637312	0.210867381	3092/6653	2
MF	GO:0035197	siRNA binding	1/63	11/17548	0.038801214	0.243637312	0.210867381	6895	1
MF	GO:0035615	clathrin adaptor activity	1/63	11/17548	0.038801214	0.243637312	0.210867381	3092	1
MF	GO:0061578	Lys63-specific deubiquitinase activity	1/63	11/17548	0.038801214	0.243637312	0.210867381	55432	1
MF	GO:0098748	endocytic adaptor activity	1/63	11/17548	0.038801214	0.243637312	0.210867381	3092	1
MF	GO:0030165	PDZ domain binding	2/63	87/17548	0.039042935	0.243637312	0.210867381	8322/85407	2
MF	GO:0004861	cyclin-dependent protein serine/threonine kinase inhibitor activity	1/63	12/17548	0.042254229	0.243637312	0.210867381	1026	1
MF	GO:0016493	C-C chemokine receptor activity	1/63	12/17548	0.042254229	0.243637312	0.210867381	1236	1
MF	GO:0036041	long-chain fatty acid binding	1/63	12/17548	0.042254229	0.243637312	0.210867381	6809	1
MF	GO:0043422	protein kinase B binding	1/63	12/17548	0.042254229	0.243637312	0.210867381	55704	1
MF	GO:1990380	Lys48-specific deubiquitinase activity	1/63	12/17548	0.042254229	0.243637312	0.210867381	55432	1
MF	GO:0008565	protein transporter activity	2/63	91/17548	0.042351321	0.243637312	0.210867381	55916/9559	2
MF	GO:0051213	dioxygenase activity	2/63	91/17548	0.042351321	0.243637312	0.210867381	112399/54665	2
MF	GO:0004896	cytokine receptor activity	2/63	93/17548	0.04404378	0.243637312	0.210867381	1236/3572	2
MF	GO:0031543	peptidyl-proline dioxygenase activity	1/63	13/17548	0.045695036	0.243637312	0.210867381	112399	1
MF	GO:0043142	single-stranded DNA-dependent ATPase activity	1/63	13/17548	0.045695036	0.243637312	0.210867381	10721	1
MF	GO:0004860	protein kinase inhibitor activity	2/63	95/17548	0.045761167	0.243637312	0.210867381	1026/161742	2
MF	GO:0005041	low-density lipoprotein particle receptor activity	1/63	14/17548	0.049123676	0.243637312	0.210867381	6653	1
MF	GO:0019206	nucleoside kinase activity	1/63	14/17548	0.049123676	0.243637312	0.210867381	51727	1
MF	GO:0019210	kinase inhibitor activity	2/63	99/17548	0.049269	0.243637312	0.210867381	1026/161742	2
MF	GO:0005521	lamin binding	1/63	15/17548	0.052540193	0.243637312	0.210867381	23345	1
MF	GO:0070742	C2H2 zinc finger domain binding	1/63	15/17548	0.052540193	0.243637312	0.210867381	23524	1
MF	GO:0035091	phosphatidylinositol binding	3/63	237/17548	0.053480389	0.243637312	0.210867381	55704/3092/64089	3
MF	GO:0042826	histone deacetylase binding	2/63	109/17548	0.058445169	0.243637312	0.210867381	84295/8625	2
MF	GO:0004675	transmembrane receptor protein serine/threonine kinase activity	1/63	17/17548	0.059337025	0.243637312	0.210867381	130399	1
MF	GO:0008409	5'-3' exonuclease activity	1/63	17/17548	0.059337025	0.243637312	0.210867381	10721	1
MF	GO:0030169	low-density lipoprotein particle binding	1/63	17/17548	0.059337025	0.243637312	0.210867381	6653	1
MF	GO:0030228	lipoprotein particle receptor activity	1/63	17/17548	0.059337025	0.243637312	0.210867381	6653	1
MF	GO:0042800	histone methyltransferase activity (H3-K4 specific)	1/63	17/17548	0.059337025	0.243637312	0.210867381	8085	1
MF	GO:0005543	phospholipid binding	4/63	410/17548	0.059627784	0.243637312	0.210867381	23092/55704/3092/64089	4
MF	GO:0004550	nucleoside diphosphate kinase activity	1/63	18/17548	0.062717423	0.243637312	0.210867381	51727	1
MF	GO:0070577	lysine-acetylated histone binding	1/63	18/17548	0.062717423	0.243637312	0.210867381	55023	1
MF	GO:0140033	acetylation-dependent protein binding	1/63	18/17548	0.062717423	0.243637312	0.210867381	55023	1
MF	GO:0008157	protein phosphatase 1 binding	1/63	19/17548	0.066085866	0.243637312	0.210867381	8036	1
MF	GO:0005086	ARF guanyl-nucleotide exchange factor activity	1/63	20/17548	0.069442395	0.243637312	0.210867381	23362	1
MF	GO:0031418	L-ascorbic acid binding	1/63	20/17548	0.069442395	0.243637312	0.210867381	112399	1
MF	GO:0004622	lysophospholipase activity	1/63	21/17548	0.072787051	0.243637312	0.210867381	11343	1
MF	GO:0008483	transaminase activity	1/63	21/17548	0.072787051	0.243637312	0.210867381	586	1
MF	GO:0008649	rRNA methyltransferase activity	1/63	22/17548	0.076119875	0.243637312	0.210867381	154743	1
MF	GO:0042813	Wnt-activated receptor activity	1/63	22/17548	0.076119875	0.243637312	0.210867381	8322	1
MF	GO:0140102	catalytic activity, acting on a rRNA	1/63	22/17548	0.076119875	0.243637312	0.210867381	154743	1
MF	GO:0016298	lipase activity	2/63	129/17548	0.078370196	0.243637312	0.210867381	11057/11343	2
MF	GO:0005158	insulin receptor binding	1/63	23/17548	0.07944091	0.243637312	0.210867381	55023	1
MF	GO:0016769	transferase activity, transferring nitrogenous groups	1/63	23/17548	0.07944091	0.243637312	0.210867381	586	1
MF	GO:0019838	growth factor binding	2/63	133/17548	0.082581064	0.243637312	0.210867381	130399/3572	2
MF	GO:0070851	growth factor receptor binding	2/63	133/17548	0.082581064	0.243637312	0.210867381	3092/3572	2
MF	GO:0005096	GTPase activator activity	3/63	286/17548	0.083439035	0.243637312	0.210867381	94134/23092/55789	3
MF	GO:0019201	nucleotide kinase activity	1/63	25/17548	0.086047772	0.243637312	0.210867381	51727	1
MF	GO:0019956	chemokine binding	1/63	25/17548	0.086047772	0.243637312	0.210867381	1236	1
MF	GO:0080025	phosphatidylinositol-3,5-bisphosphate binding	1/63	25/17548	0.086047772	0.243637312	0.210867381	3092	1
MF	GO:1901567	fatty acid derivative binding	1/63	25/17548	0.086047772	0.243637312	0.210867381	6809	1
MF	GO:0001637	G-protein coupled chemoattractant receptor activity	1/63	26/17548	0.089333681	0.243637312	0.210867381	1236	1
MF	GO:0004950	chemokine receptor activity	1/63	26/17548	0.089333681	0.243637312	0.210867381	1236	1
MF	GO:0043325	phosphatidylinositol-3,4-bisphosphate binding	1/63	26/17548	0.089333681	0.243637312	0.210867381	3092	1
MF	GO:0071813	lipoprotein particle binding	1/63	27/17548	0.092607964	0.245138727	0.212166852	6653	1
MF	GO:0071814	protein-lipid complex binding	1/63	27/17548	0.092607964	0.245138727	0.212166852	6653	1
MF	GO:0052689	carboxylic ester hydrolase activity	2/63	144/17548	0.094506377	0.246524553	0.21336628	11057/11343	2
MF	GO:0005504	fatty acid binding	1/63	28/17548	0.09587066	0.246524553	0.21336628	6809	1
MF	GO:0003887	DNA-directed DNA polymerase activity	1/63	29/17548	0.09912181	0.247804524	0.214474091	10721	1
MF	GO:0051959	dynein light intermediate chain binding	1/63	29/17548	0.09912181	0.247804524	0.214474091	55704	1
MF	GO:0030695	GTPase regulator activity	3/63	316/17548	0.104655936	0.253415117	0.219330043	94134/23092/55789	3
MF	GO:0017147	Wnt-protein binding	1/63	31/17548	0.105589632	0.253415117	0.219330043	8322	1
MF	GO:0030332	cyclin binding	1/63	31/17548	0.105589632	0.253415117	0.219330043	1026	1
MF	GO:0008757	S-adenosylmethionine-dependent methyltransferase activity	2/63	158/17548	0.110346675	0.255216648	0.220889263	154743/8085	2
MF	GO:0005154	epidermal growth factor receptor binding	1/63	33/17548	0.112011751	0.255216648	0.220889263	3092	1
MF	GO:0016538	cyclin-dependent protein serine/threonine kinase regulator activity	1/63	33/17548	0.112011751	0.255216648	0.220889263	1026	1
MF	GO:0061980	regulatory RNA binding	1/63	33/17548	0.112011751	0.255216648	0.220889263	6895	1
MF	GO:0004693	cyclin-dependent protein serine/threonine kinase activity	1/63	35/17548	0.118388484	0.264709968	0.229105703	1026	1
MF	GO:0032266	phosphatidylinositol-3-phosphate binding	1/63	36/17548	0.12155993	0.264709968	0.229105703	3092	1
MF	GO:0097472	cyclin-dependent protein kinase activity	1/63	36/17548	0.12155993	0.264709968	0.229105703	1026	1
MF	GO:0019902	phosphatase binding	2/63	168/17548	0.122060708	0.264709968	0.229105703	8036/161742	2
MF	GO:0036002	pre-mRNA binding	1/63	37/17548	0.124720147	0.267257458	0.231310548	6895	1
MF	GO:0005484	SNAP receptor activity	1/63	38/17548	0.127869175	0.270781782	0.234360841	6809	1
MF	GO:0060589	nucleoside-triphosphatase regulator activity	3/63	359/17548	0.138327228	0.283862373	0.245682054	94134/23092/55789	3
MF	GO:0016776	phosphotransferase activity, phosphate group as acceptor	1/63	42/17548	0.140354173	0.283862373	0.245682054	51727	1
MF	GO:0034061	DNA polymerase activity	1/63	42/17548	0.140354173	0.283862373	0.245682054	10721	1
MF	GO:0035254	glutamate receptor binding	1/63	42/17548	0.140354173	0.283862373	0.245682054	3092	1
MF	GO:0016706	oxidoreductase activity, acting on paired donors, with incorporation or reduction of molecular oxygen, 2-oxoglutarate as one donor, and incorporation of one atom each of oxygen into both donors	1/63	45/17548	0.149602332	0.299204665	0.258960763	112399	1
MF	GO:0042393	histone binding	2/63	194/17548	0.153795822	0.304211517	0.263294178	84295/55023	2
MF	GO:0018024	histone-lysine N-methyltransferase activity	1/63	47/17548	0.155713303	0.304656463	0.263679278	8085	1
MF	GO:0019887	protein kinase regulator activity	2/63	200/17548	0.161337276	0.309793504	0.268125372	1026/161742	2
MF	GO:0016684	oxidoreductase activity, acting on peroxide as acceptor	1/63	49/17548	0.161781052	0.309793504	0.268125372	143686	1
MF	GO:0019205	nucleobase-containing compound kinase activity	1/63	50/17548	0.164798813	0.312250382	0.270251793	51727	1
MF	GO:0008168	methyltransferase activity	2/63	215/17548	0.180473864	0.338388495	0.292874253	154743/8085	2
MF	GO:0019207	kinase regulator activity	2/63	222/17548	0.189522607	0.344790173	0.298414887	1026/161742	2
MF	GO:0003707	steroid hormone receptor activity	1/63	59/17548	0.191481933	0.344790173	0.298414887	11057	1
MF	GO:0097110	scaffold protein binding	1/63	59/17548	0.191481933	0.344790173	0.298414887	84295	1
MF	GO:0016597	amino acid binding	1/63	60/17548	0.194394429	0.344790173	0.298414887	143686	1
MF	GO:0042054	histone methyltransferase activity	1/63	60/17548	0.194394429	0.344790173	0.298414887	8085	1
MF	GO:0016741	transferase activity, transferring one-carbon groups	2/63	227/17548	0.196024963	0.344790173	0.298414887	154743/8085	2
MF	GO:0033293	monocarboxylic acid binding	1/63	61/17548	0.197296599	0.344790173	0.298414887	6809	1
MF	GO:0016279	protein-lysine N-methyltransferase activity	1/63	62/17548	0.20018848	0.34483603	0.298454575	8085	1
MF	GO:0008173	RNA methyltransferase activity	1/63	63/17548	0.203070106	0.34483603	0.298454575	154743	1
MF	GO:0016278	lysine N-methyltransferase activity	1/63	63/17548	0.203070106	0.34483603	0.298454575	8085	1
MF	GO:0003725	double-stranded RNA binding	1/63	66/17548	0.211653821	0.356053158	0.308162967	6895	1
MF	GO:0003684	damaged DNA binding	1/63	68/17548	0.217325682	0.36220947	0.313491237	10721	1
MF	GO:0048029	monosaccharide binding	1/63	69/17548	0.220146534	0.363544734	0.314646905	112399	1
MF	GO:0016835	carbon-oxygen lyase activity	1/63	72/17548	0.228549192	0.373989587	0.323686894	10721	1
MF	GO:0030276	clathrin binding	1/63	73/17548	0.231330229	0.375130101	0.324674005	3092	1
MF	GO:0030295	protein kinase activator activity	1/63	74/17548	0.234101399	0.376234391	0.325629765	1026	1
MF	GO:0051219	phosphoprotein binding	1/63	76/17548	0.239614276	0.380309116	0.329156428	84295	1
MF	GO:0005201	extracellular matrix structural constituent	1/63	77/17548	0.242356051	0.380309116	0.329156428	255631	1
MF	GO:0004527	exonuclease activity	1/63	78/17548	0.245088097	0.380309116	0.329156428	10721	1
MF	GO:0019888	protein phosphatase regulator activity	1/63	78/17548	0.245088097	0.380309116	0.329156428	8036	1
MF	GO:0004843	thiol-dependent ubiquitin-specific protease activity	1/63	80/17548	0.250523134	0.384439664	0.332731405	55432	1
MF	GO:0019209	kinase activator activity	1/63	81/17548	0.253226194	0.384439664	0.332731405	1026	1
MF	GO:0008013	beta-catenin binding	1/63	82/17548	0.255919659	0.384439664	0.332731405	83439	1
MF	GO:0042277	peptide binding	2/63	273/17548	0.2568358	0.384439664	0.332731405	8322/6653	2
MF	GO:0019199	transmembrane receptor protein kinase activity	1/63	83/17548	0.258603562	0.384439664	0.332731405	130399	1
MF	GO:0008094	DNA-dependent ATPase activity	1/63	84/17548	0.261277938	0.384439664	0.332731405	10721	1
MF	GO:0005126	cytokine receptor binding	2/63	278/17548	0.263502535	0.384439664	0.332731405	3572/161742	2
MF	GO:0050662	coenzyme binding	2/63	279/17548	0.264836213	0.384439664	0.332731405	154743/112399	2
MF	GO:0046982	protein heterodimerization activity	3/63	500/17548	0.267127316	0.384663336	0.332924992	8322/3092/23023	3
MF	GO:0008276	protein methyltransferase activity	1/63	91/17548	0.279734574	0.396474199	0.34314726	8085	1
MF	GO:0019208	phosphatase regulator activity	1/63	91/17548	0.279734574	0.396474199	0.34314726	8036	1
MF	GO:0042562	hormone binding	1/63	94/17548	0.287504937	0.404303817	0.349923772	11057	1
MF	GO:0051087	chaperone binding	1/63	96/17548	0.292639285	0.407653855	0.352823219	993	1
MF	GO:0008170	N-methyltransferase activity	1/63	97/17548	0.295192788	0.407653855	0.352823219	8085	1
MF	GO:0004620	phospholipase activity	1/63	99/17548	0.300272608	0.407653855	0.352823219	11343	1
MF	GO:1902936	phosphatidylinositol bisphosphate binding	1/63	99/17548	0.300272608	0.407653855	0.352823219	3092	1
MF	GO:0004725	protein tyrosine phosphatase activity	1/63	100/17548	0.302798989	0.407653855	0.352823219	993	1
MF	GO:0033218	amide binding	2/63	308/17548	0.303475647	0.407653855	0.352823219	8322/6653	2
MF	GO:0005200	structural constituent of cytoskeleton	1/63	107/17548	0.320234044	0.426978725	0.369548838	3092	1
MF	GO:0019903	protein phosphatase binding	1/63	119/17548	0.349129813	0.458192977	0.396564682	8036	1
MF	GO:0043021	ribonucleoprotein complex binding	1/63	120/17548	0.35148249	0.458192977	0.396564682	84295	1
MF	GO:0036459	thiol-dependent ubiquitinyl hydrolase activity	1/63	121/17548	0.353826799	0.458192977	0.396564682	55432	1
MF	GO:0101005	ubiquitinyl hydrolase activity	1/63	121/17548	0.353826799	0.458192977	0.396564682	55432	1
MF	GO:0004702	signal transducer, downstream of receptor, with serine/threonine kinase activity	1/63	123/17548	0.358490423	0.459680439	0.397852076	130399	1
MF	GO:0015631	tubulin binding	2/63	351/17548	0.36008301	0.459680439	0.397852076	55704/84295	2
MF	GO:0000149	SNARE binding	1/63	129/17548	0.372283452	0.471019933	0.407666374	6809	1
MF	GO:0019783	ubiquitin-like protein-specific protease activity	1/63	131/17548	0.376815946	0.471019933	0.407666374	55432	1
MF	GO:0140030	modification-dependent protein binding	1/63	131/17548	0.376815946	0.471019933	0.407666374	55023	1
MF	GO:0008528	G-protein coupled peptide receptor activity	1/63	133/17548	0.381316229	0.47287524	0.409272138	1236	1
MF	GO:0001653	peptide receptor activity	1/63	134/17548	0.383554361	0.47287524	0.409272138	1236	1
MF	GO:0019842	vitamin binding	1/63	139/17548	0.394626053	0.483215575	0.418221667	112399	1
MF	GO:0016779	nucleotidyltransferase activity	1/63	142/17548	0.401174887	0.487915403	0.422289354	10721	1
MF	GO:1901981	phosphatidylinositol phosphate binding	1/63	147/17548	0.411935012	0.497639612	0.430705629	3092	1
MF	GO:0004857	enzyme inhibitor activity	2/63	397/17548	0.418782519	0.502539023	0.434946055	1026/161742	2
MF	GO:0016705	oxidoreductase activity, acting on paired donors, with incorporation or reduction of molecular oxygen	1/63	160/17548	0.439028837	0.523345633	0.452954115	112399	1
MF	GO:0005506	iron ion binding	1/63	162/17548	0.443086597	0.524707813	0.454133078	112399	1
MF	GO:0005057	signal transducer activity, downstream of receptor	1/63	169/17548	0.457062583	0.536529467	0.464364685	130399	1
MF	GO:0030674	protein binding, bridging	1/63	170/17548	0.459030767	0.536529467	0.464364685	3092	1
MF	GO:0017048	Rho GTPase binding	1/63	173/17548	0.464893283	0.539876071	0.467261161	23500	1
MF	GO:0004721	phosphoprotein phosphatase activity	1/63	179/17548	0.476431369	0.548404317	0.474642332	993	1
MF	GO:0016829	lyase activity	1/63	180/17548	0.478330432	0.548404317	0.474642332	10721	1
MF	GO:0008022	protein C-terminus binding	1/63	189/17548	0.495119772	0.5640605	0.488192713	4863	1
MF	GO:0060090	molecular adaptor activity	1/63	191/17548	0.498777892	0.564654217	0.488706574	3092	1
MF	GO:0000287	magnesium ion binding	1/63	196/17548	0.507809459	0.568196746	0.491772622	5567	1
MF	GO:0140097	catalytic activity, acting on DNA	1/63	197/17548	0.509596458	0.568196746	0.491772622	10721	1
MF	GO:0008234	cysteine-type peptidase activity	1/63	198/17548	0.511377071	0.568196746	0.491772622	55432	1
MF	GO:0048037	cofactor binding	2/63	490/17548	0.528567917	0.583694632	0.505185997	154743/112399	2
MF	GO:0004518	nuclease activity	1/63	214/17548	0.539016549	0.591603529	0.512031124	10721	1
MF	GO:0061630	ubiquitin protein ligase activity	1/63	224/17548	0.55550371	0.606004047	0.524494731	143279	1
MF	GO:0061659	ubiquitin-like protein ligase activity	1/63	229/17548	0.563528277	0.61026362	0.528181379	143279	1
MF	GO:0003714	transcription corepressor activity	1/63	232/17548	0.568274404	0.61026362	0.528181379	4863	1
MF	GO:0001227	transcriptional repressor activity, RNA polymerase II transcription regulatory region sequence-specific DNA binding	1/63	233/17548	0.569845131	0.61026362	0.528181379	84295	1
MF	GO:1901681	sulfur compound binding	1/63	235/17548	0.572969732	0.61026362	0.528181379	154743	1
MF	GO:0030246	carbohydrate binding	1/63	266/17548	0.618639341	0.65320153	0.565344014	112399	1
MF	GO:0008017	microtubule binding	1/63	268/17548	0.621414786	0.65320153	0.565344014	55704	1
MF	GO:0016791	phosphatase activity	1/63	270/17548	0.624170351	0.65320153	0.565344014	993	1
MF	GO:0003713	transcription coactivator activity	1/63	317/17548	0.683532863	0.711190262	0.615533092	4863	1
MF	GO:0005085	guanyl-nucleotide exchange factor activity	1/63	323/17548	0.690413108	0.714220457	0.618155717	23362	1
MF	GO:0042578	phosphoric ester hydrolase activity	1/63	364/17548	0.733644359	0.754605626	0.653108963	993	1
MF	GO:0140098	catalytic activity, acting on RNA	1/63	375/17548	0.744194264	0.76110777	0.65873655	154743	1
MF	GO:0042623	ATPase activity, coupled	1/63	380/17548	0.748852682	0.7615451	0.659115058	10721	1
MF	GO:0004842	ubiquitin-protein transferase activity	1/63	446/17548	0.803052325	0.812075384	0.702848871	143279	1
MF	GO:0016887	ATPase activity	1/63	457/17548	0.810889823	0.815419933	0.705743568	10721	1
MF	GO:0019787	ubiquitin-like protein transferase activity	1/63	472/17548	0.821084678	0.821084678	0.710646388	143279	1
