# Supplementary material for: The Identification and Verification of Key Long Noncoding RNAs in Ischemic Stroke
Source: Biomed Res Int. 2020 Dec 29;2020:2094320. doi: 10.1155/2020/2094320 (PMC7789472; doi:10.1155/2020/2094320)
Supplement: Supplementary 3 — Table S3: detailed information regarding the results of KEGG pathway analysis. [file 2094320.f3.txt]

ID	Description	BgRatio	pvalue	p.adjust	qvalue	geneID	Count
hsa04934	Cushing syndrome	155/7837	0.000161094	0.011810054	0.010297847	1026/8322/8085/5567/83439	5
hsa04310	Wnt signaling pathway	158/7837	0.000176269	0.011810054	0.010297847	23500/8322/85407/5567/83439	5
hsa05217	Basal cell carcinoma	63/7837	0.001262	0.056369351	0.049151594	1026/8322/83439	3
hsa04916	Melanogenesis	101/7837	0.004854687	0.162632002	0.141807952	8322/5567/83439	3
hsa05216	Thyroid cancer	37/7837	0.007067956	0.189421224	0.165166975	1026/83439	2
hsa04550	Signaling pathways regulating pluripotency of stem cells	139/7837	0.011698234	0.204426459	0.178250879	130399/8322/3572	3
hsa05224	Breast cancer	147/7837	0.013602545	0.204426459	0.178250879	1026/8322/83439	3
hsa05226	Gastric cancer	149/7837	0.014104804	0.204426459	0.178250879	1026/8322/83439	3
hsa04923	Regulation of lipolysis in adipocytes	55/7837	0.015171432	0.204426459	0.178250879	11343/5567	2
hsa04390	Hippo signaling pathway	154/7837	0.015406646	0.204426459	0.178250879	8322/85407/83439	3
hsa05213	Endometrial cancer	58/7837	0.016781276	0.204426459	0.178250879	1026/83439	2
hsa05225	Hepatocellular carcinoma	168/7837	0.019406077	0.216701198	0.188953912	1026/8322/83439	3
hsa05211	Renal cell carcinoma	69/7837	0.023271122	0.225072732	0.196253521	1026/112399	2
hsa05165	Human papillomavirus infection	330/7837	0.025190473	0.225072732	0.196253521	1026/8322/5567/83439	4
hsa04115	p53 signaling pathway	72/7837	0.025194709	0.225072732	0.196253521	1026/143686	2
hsa05203	Viral carcinogenesis	201/7837	0.03092425	0.243755853	0.212544381	1026/3572/5567	3
hsa05205	Proteoglycans in cancer	201/7837	0.03092425	0.243755853	0.212544381	1026/8322/5567	3
hsa05210	Colorectal cancer	86/7837	0.034983716	0.260434333	0.227087282	1026/83439	2
hsa04211	Longevity regulating pathway	89/7837	0.037246826	0.262688142	0.229052504	5567/143686	2
hsa05215	Prostate cancer	97/7837	0.043549385	0.268055708	0.233732786	1026/83439	2
hsa01522	Endocrine resistance	98/7837	0.044363722	0.268055708	0.233732786	1026/5567	2
hsa04914	Progesterone-mediated oocyte maturation	99/7837	0.045183796	0.268055708	0.233732786	993/5567	2
hsa04066	HIF-1 signaling pathway	100/7837	0.046009562	0.268055708	0.233732786	1026/112399	2
